# Supplementary material for: Prevalence Trends of Site‐Specific Osteoarthritis From 1990 to 2019: Findings From the Global Burden of Disease Study 2019
Source: PubMed Central journal article supplement — Arthritis Rheumatol. 2022 Jun 2;74(7):1172–83. doi: 10.1002/art.42089 (PMC9543105; doi:10.1002/art.42089), 2022-06-02

Table S1. The prevalent cases and ASR of OA knee in 1990 and 2019.

| Characteristics          | 1990                           |                                | 2019                           |                                | 1990-2019 |                  |
|--------------------------|--------------------------------|--------------------------------|--------------------------------|--------------------------------|-----------|------------------|
|                          | Prevalent cases                | ASR per 100 000                | Prevalent cases                | ASR per 100 000                | Change*   | EAPC             |
|                          | No. × 10 <sup>6</sup> (95% UI) | No. × 10 <sup>3</sup> (95% UI) | No. × 10 <sup>6</sup> (95% UI) | No. × 10 <sup>3</sup> (95% UI) | (%)       | No. (95% CI)     |
| Overall                  | 163.91 (141.00-187.92)         | 4.07 (3.52-4.66)               | 364.58 (315.25-417.4)          | 4.38 (3.79-5.00)               | 122.42    | 0.32 (0.29-0.34) |
| Sex                      |                                |                                |                                |                                |           |                  |
| Male                     | 62.43 (53.34-71.98)            | 3.28 (2.83-3.77)               | 139.42 (119.55-160.63)         | 3.51 (3.03-4.04)               | 123.31    | 0.26 (0.23-0.29) |
| Female                   | 101.48 (87.75-116.31)          | 4.76 (4.12-5.44)               | 225.16 (195.12-256.97)         | 5.16 (4.47-5.89)               | 121.87    | 0.37 (0.34-0.40) |
| SDI                      |                                |                                |                                |                                |           |                  |
| Low SDI                  | 8.40 (7.21-9.70)               | 3.39 (2.91-3.91)               | 19.75 (16.99-22.76)            | 3.62 (3.13-4.16)               | 135.02    | 0.24 (0.23-0.24) |
| Low-middle SDI           | 23.82 (20.48-27.36)            | 3.78 (3.27-4.32)               | 59.05 (50.92-67.62)            | 4.17 (3.61-4.76)               | 147.90    | 0.42 (0.39-0.44) |
| Middle SDI               | 44.35 (38.02-51.06)            | 4.11 (3.54-4.71)               | 115.94 (99.56-133.4)           | 4.42 (3.82-5.07)               | 161.40    | 0.39 (0.33-0.46) |
| High-middle SDI          | 41.40 (35.47-47.74)            | 3.83 (3.30-4.39)               | 87.79 (75.58-101.27)           | 4.29 (3.68-4.94)               | 112.02    | 0.47 (0.42-0.51) |
| High SDI                 | 45.85 (39.53-52.30)            | 4.51 (3.89-5.16)               | 81.87 (71.06-93.16)            | 4.70 (4.08-5.37)               | 78.55     | 0.11 (0.07-0.15) |
| Region                   |                                |                                |                                |                                |           |                  |
| High-income Asia Pacific | 11.33 (9.77-13.01)             | 5.52 (4.77-6.32)               | 22.23 (19.30-25.27)            | 5.66 (4.90-6.48)               | 96.30     | 0.16 (0.11-0.20) |
| Central Asia             | 1.28 (1.10-1.48)               | 2.73 (2.34-3.14)               | 2.26 (1.92-2.64)               | 2.91 (2.49-3.37)               | 76.41     | 0.20 (0.18-0.22) |
| East Asia                | 44.14 (37.72-51.12)            | 4.79 (4.11-5.53)               | 111.80 (95.10-130.04)          | 5.12 (4.39-5.92)               | 153.29    | 0.48 (0.37-0.60) |
| South Asia               | 21.03 (18.00-24.32)            | 3.48 (2.99-4.00)               | 56.44 (48.78-64.87)            | 3.87 (3.34-4.44)               | 168.43    | 0.39 (0.38-0.40) |
| Southeast Asia           | 7.98 (6.80-9.21)               | 2.95 (2.54-3.40)               | 21.65 (18.54-25.03)            | 3.32 (2.85-3.83)               | 171.52    | 0.43 (0.42-0.44) |
| Australasia              | 1.01 (0.87-1.16)               | 4.37 (3.75-5.04)               | 2.25 (1.95-2.58)               | 4.90 (4.25-5.65)               | 123.62    | 0.40 (0.36-0.43) |
| Caribbean                | 1.10 (0.94-1.26)               | 4.19 (3.61-4.82)               | 2.39 (2.05-2.75)               | 4.59 (3.94-5.27)               | 117.83    | 0.34 (0.32-0.36) |
| Central Europe           | 4.69 (4.02-5.43)               | 3.17 (2.72-3.66)               | 6.91 (5.91-7.95)               | 3.41 (2.93-3.94)               | 47.35     | 0.24 (0.23-0.25) |
| Eastern Europe           | 9.39 (8.00-10.91)              | 3.35 (2.88-3.87)               | 12.23 (10.46-14.17)            | 3.60 (3.09-4.16)               | 30.31     | 0.27 (0.26-0.28) |
| Western Europe           | 22.30 (19.16-25.61)            | 4.01 (3.45-4.59)               | 34.77 (29.99-39.76)            | 4.26 (3.66-4.89)               | 55.88     | 0.19 (0.16-0.21) |

|                              |                     |                  |                     |                  |        |                     |
|------------------------------|---------------------|------------------|---------------------|------------------|--------|---------------------|
| Andean Latin America         | 0.86 (0.74-0.99)    | 4.11 (3.53-4.73) | 2.64 (2.29-3.02)    | 4.64 (4.02-5.30) | 205.62 | 0.41 (0.40-0.43)    |
| Central Latin America        | 3.63 (3.13-4.18)    | 4.22 (3.64-4.85) | 11.07 (9.54-12.75)  | 4.60 (3.97-5.29) | 204.77 | 0.29 (0.28-0.30)    |
| Southern Latin America       | 1.95 (1.67-2.23)    | 4.20 (3.60-4.81) | 3.87 (3.34-4.44)    | 4.73 (4.09-5.44) | 98.43  | 0.40 (0.35-0.45)    |
| Tropical Latin America       | 3.88 (3.32-4.48)    | 4.12 (3.55-4.74) | 11.27 (9.70-13.02)  | 4.56 (3.93-5.26) | 190.79 | 0.37 (0.36-0.38)    |
| North Africa and Middle East | 6.16 (5.28-7.12)    | 3.47 (2.99-3.99) | 17.75 (15.27-20.42) | 3.86 (3.32-4.44) | 188.11 | 0.34 (0.33-0.36)    |
| High-income North America    | 15.36 (13.25-17.54) | 4.58 (3.95-5.25) | 26.50 (23.11-30.04) | 4.49 (3.92-5.10) | 72.52  | -0.25 (-0.44--0.06) |
| Oceania                      | 0.12 (0.10-0.14)    | 3.74 (3.21-4.28) | 0.32 (0.27-0.37)    | 4.04 (3.48-4.67) | 162.88 | 0.23 (0.19-0.27)    |
| Central Sub-Saharan Africa   | 0.81 (0.69-0.94)    | 3.36 (2.89-3.90) | 2.00 (1.71-2.33)    | 3.51 (3.02-4.07) | 148.43 | 0.10 (0.08-0.12)    |
| Eastern Sub-Saharan Africa   | 2.57 (2.19-2.97)    | 3.29 (2.83-3.80) | 6.05 (5.17-6.96)    | 3.50 (3.01-4.04) | 135.64 | 0.22 (0.22-0.23)    |
| Southern Sub-Saharan Africa  | 1.05 (0.90-1.22)    | 3.74 (3.21-4.31) | 2.34 (2.01-2.71)    | 4.00 (3.44-4.62) | 123.35 | 0.24 (0.23-0.24)    |
| Western Sub-Saharan Africa   | 3.30 (2.82-3.81)    | 3.62 (3.11-4.17) | 7.84 (6.68-9.03)    | 3.88 (3.33-4.47) | 137.56 | 0.23 (0.17-0.30)    |

ASR, age-standardized prevalence rate; EAPC, estimated annual percentage change; UI, uncertainty interval; CI, confidential interval.

\* Change in absolute number (%)

Table S2. The prevalent cases and ASR of OA hip in 1990 and 2019.

| Characteristics          | 1990                       |                            | 2019                       |                            | 1990-2019 |                  |
|--------------------------|----------------------------|----------------------------|----------------------------|----------------------------|-----------|------------------|
|                          | Prevalent cases            | ASR per 100 000            | Prevalent cases            | ASR per 100 000            | Change*   | EAPC             |
|                          | No. $\times 10^6$ (95% UI) | No. $\times 10^2$ (95% UI) | No. $\times 10^6$ (95% UI) | No. $\times 10^2$ (95% UI) | (%)       | No. (95% CI)     |
| Overall                  | 14.50 (11.17-18.24)        | 3.69 (2.86-4.62)           | 32.99 (25.69-41.12)        | 4.01 (3.13-4.99)           | 127.51    | 0.28 (0.26-0.31) |
| Sex                      |                            |                            |                            |                            |           |                  |
| Male                     | 6.54 (5.03-8.20)           | 3.57 (2.76-4.47)           | 15.32 (11.85-19.17)        | 3.95 (3.07-4.92)           | 134.17    | 0.31 (0.28-0.34) |
| Female                   | 7.96 (6.18-9.97)           | 3.77 (2.92-4.72)           | 17.67 (13.80-21.97)        | 4.05 (3.17-5.04)           | 122.04    | 0.29 (0.25-0.33) |
| SDI                      |                            |                            |                            |                            |           |                  |
| Low SDI                  | 0.61 (0.47-0.76)           | 2.48 (1.92-3.12)           | 1.52 (1.17-1.91)           | 2.79 (2.17-3.51)           | 150.58    | 0.45 (0.42-0.49) |
| Low-middle SDI           | 1.37 (1.06-1.73)           | 2.21 (1.71-2.79)           | 3.83 (2.96-4.83)           | 2.72 (2.11-3.44)           | 178.74    | 0.83 (0.74-0.91) |
| Middle SDI               | 2.29 (1.77-2.87)           | 2.16 (1.67-2.72)           | 6.93 (5.35-8.70)           | 2.71 (2.10-3.41)           | 202.93    | 0.80 (0.75-0.85) |
| High-middle SDI          | 3.81 (2.93-4.81)           | 3.57 (2.75-4.49)           | 7.86 (6.05-9.92)           | 3.86 (2.99-4.87)           | 106.21    | 0.29 (0.27-0.31) |
| High SDI                 | 6.41 (4.98-8.02)           | 6.25 (4.83-7.88)           | 12.83 (10.03-16.04)        | 7.24 (5.70-8.97)           | 100.11    | 0.47 (0.44-0.50) |
| Region                   |                            |                            |                            |                            |           |                  |
| High-income Asia Pacific | 0.85 (0.66-1.07)           | 4.19 (3.23-5.26)           | 1.84 (1.40-2.33)           | 4.60 (3.53-5.8)            | 115.87    | 0.30 (0.22-0.37) |
| Central Asia             | 0.17 (0.13-0.22)           | 3.63 (2.78-4.57)           | 0.31 (0.24-0.40)           | 4.13 (3.17-5.16)           | 84.50     | 0.41 (0.37-0.44) |
| East Asia                | 1.57 (1.20-1.99)           | 1.73 (1.33-2.20)           | 4.94 (3.79-6.27)           | 2.33 (1.79-2.96)           | 215.27    | 1.13 (1.03-1.24) |
| South Asia               | 1.32 (1.01-1.67)           | 2.18 (1.69-2.73)           | 4.06 (3.15-5.14)           | 2.77 (2.16-3.49)           | 206.94    | 1.03 (0.89-1.17) |
| Southeast Asia           | 0.56 (0.43-0.70)           | 2.11 (1.62-2.66)           | 1.58 (1.22-1.98)           | 2.52 (1.93-3.18)           | 184.07    | 0.65 (0.62-0.68) |
| Australasia              | 0.13 (0.10-0.17)           | 5.71 (4.36-7.19)           | 0.35 (0.27-0.44)           | 7.55 (5.78-9.49)           | 166.69    | 0.97 (0.88-1.06) |
| Caribbean                | 0.07 (0.06-0.09)           | 2.86 (2.20-3.57)           | 0.17 (0.13-0.22)           | 3.37 (2.59-4.24)           | 134.15    | 0.65 (0.6-0.69)  |
| Central Europe           | 0.58 (0.45-0.74)           | 3.97 (3.04-4.99)           | 0.94 (0.72-1.19)           | 4.58 (3.51-5.75)           | 60.23     | 0.49 (0.48-0.50) |
| Eastern Europe           | 1.07 (0.82-1.35)           | 3.85 (2.95-4.84)           | 1.52 (1.17-1.92)           | 4.49 (3.44-5.65)           | 42.19     | 0.55 (0.53-0.57) |
| Western Europe           | 3.62 (2.78-4.55)           | 6.47 (5.02-8.13)           | 6.15 (4.68-7.86)           | 7.42 (5.74-9.29)           | 70.17     | 0.49 (0.43-0.56) |

|                              |                  |                  |                  |                   |        |                   |
|------------------------------|------------------|------------------|------------------|-------------------|--------|-------------------|
| Andean Latin America         | 0.06 (0.04-0.07) | 2.67 (2.05-3.38) | 0.19 (0.14-0.24) | 3.29 (2.52-4.16)  | 233.77 | 0.72 (0.68-0.76)  |
| Central Latin America        | 0.23 (0.18-0.29) | 2.66 (2.04-3.37) | 0.73 (0.56-0.92) | 3.05 (2.35-3.86)  | 217.44 | 0.22 (0.13-0.31)  |
| Southern Latin America       | 0.23 (0.18-0.29) | 5.08 (3.87-6.35) | 0.55 (0.43-0.70) | 6.74 (5.19-8.51)  | 135.96 | 0.97 (0.86-1.08)  |
| Tropical Latin America       | 0.27 (0.21-0.33) | 2.83 (2.17-3.57) | 0.84 (0.65-1.06) | 3.43 (2.65-4.32)  | 216.46 | 0.70 (0.68-0.72)  |
| North Africa and Middle East | 0.40 (0.31-0.51) | 2.27 (1.75-2.85) | 1.28 (0.99-1.62) | 2.80 (2.16-3.54)  | 218.12 | 0.65 (0.60-0.69)  |
| High-income North America    | 2.70 (2.09-3.41) | 7.91 (6.09-9.97) | 5.91 (4.69-7.33) | 9.84 (7.85-12.11) | 118.77 | 0.67 (0.57-0.78)  |
| Oceania                      | 0.01 (0.01-0.01) | 2.49 (1.91-3.13) | 0.02 (0.02-0.03) | 2.76 (2.12-3.52)  | 163.81 | 0.24 (0.14-0.34)  |
| Central Sub-Saharan Africa   | 0.07 (0.05-0.09) | 2.93 (2.25-3.70) | 0.17 (0.13-0.22) | 3.13 (2.42-3.94)  | 155.51 | 0.15 (0.10-0.20)  |
| Eastern Sub-Saharan Africa   | 0.22 (0.17-0.28) | 2.89 (2.23-3.67) | 0.56 (0.43-0.70) | 3.26 (2.51-4.10)  | 150.70 | 0.44 (0.42-0.46)  |
| Southern Sub-Saharan Africa  | 0.11 (0.09-0.14) | 3.98 (3.04-5.05) | 0.26 (0.20-0.33) | 4.54 (3.46-5.75)  | 136.38 | 0.47 (0.44-0.49)  |
| Western Sub-Saharan Africa   | 0.25 (0.19-0.32) | 2.80 (2.16-3.55) | 0.60 (0.46-0.76) | 3.00 (2.31-3.79)  | 136.17 | 0.08 (-0.04-0.20) |

ASR, age-standardized prevalence rate; EAPC, estimated annual percentage change; UI, uncertainty interval; CI, confidential interval.

\* Change in absolute number (%)

Table S3. The prevalent cases and ASR of OA hand in 1990 and 2019.

| Characteristics          | 1990                           |                                | 2019                           |                                | 1990-2019 |                     |
|--------------------------|--------------------------------|--------------------------------|--------------------------------|--------------------------------|-----------|---------------------|
|                          | Prevalent cases                | ASR per 100 000                | Prevalent cases                | ASR per 100 000                | Change*   | EAPC                |
|                          | No. × 10 <sup>6</sup> (95% UI) | No. × 10 <sup>3</sup> (95% UI) | No. × 10 <sup>6</sup> (95% UI) | No. × 10 <sup>3</sup> (95% UI) | (%)       | No. (95% CI)        |
| Overall                  | 74.27 (56.30-97.42)            | 1.89 (1.43-2.47)               | 142.48 (108.63-186.79)         | 1.73 (1.32-2.25)               | 91.84     | -0.36 (-0.38--0.33) |
| Sex                      |                                |                                |                                |                                |           |                     |
| Male                     | 24.15 (18.26-32.01)            | 1.31 (1.00-1.73)               | 47.04 (35.73-62.30)            | 1.21 (0.93-1.59)               | 94.80     | -0.64 (-0.76--0.51) |
| Female                   | 50.12 (38.02-65.33)            | 2.38 (1.80-3.10)               | 95.44 (72.72-124.37)           | 2.18 (1.66-2.84)               | 90.41     | -0.20 (-0.25--0.14) |
| SDI                      |                                |                                |                                |                                |           |                     |
| Low SDI                  | 3.10 (2.31-4.13)               | 1.28 (0.96-1.70)               | 6.87 (5.11-9.13)               | 1.28 (0.96-1.69)               | 121.57    | -0.01 (-0.01--0.01) |
| Low-middle SDI           | 5.20 (3.80-7.03)               | 0.87 (0.65-1.17)               | 12.35 (9.13-16.61)             | 0.90 (0.67-1.20)               | 137.40    | 0.03 (-0.01-0.07)   |
| Middle SDI               | 8.89 (6.56-12.06)              | 0.86 (0.65-1.16)               | 23.98 (17.84-32.11)            | 0.94 (0.71-1.26)               | 169.61    | 0.03 (-0.12-0.18)   |
| High-middle SDI          | 23.46 (17.76-30.66)            | 2.19 (1.66-2.85)               | 36.52 (27.46-47.85)            | 1.78 (1.34-2.32)               | 55.68     | -1.09 (-1.23--0.94) |
| High SDI                 | 33.60 (25.47-43.81)            | 3.32 (2.52-4.32)               | 62.72 (47.87-81.81)            | 3.60 (2.74-4.66)               | 86.69     | 0.49 (0.36-0.63)    |
| Region                   |                                |                                |                                |                                |           |                     |
| High-income Asia Pacific | 5.78 (4.35-7.64)               | 2.83 (2.13-3.74)               | 12.85 (9.64-16.77)             | 3.30 (2.49-4.33)               | 122.25    | 1.50 (1.16-1.84)    |
| Central Asia             | 1.00 (0.74-1.33)               | 2.14 (1.60-2.85)               | 1.60 (1.18-2.13)               | 2.09 (1.55-2.78)               | 60.56     | -0.05 (-0.1-0)      |
| East Asia                | 7.27 (5.26-10.01)              | 0.83 (0.61-1.13)               | 20.26 (14.77-27.49)            | 0.95 (0.70-1.28)               | 178.69    | -0.14 (-0.49-0.2)   |
| South Asia               | 4.72 (3.41-6.43)               | 0.83 (0.62-1.12)               | 11.96 (8.80-16.23)             | 0.85 (0.63-1.15)               | 153.52    | 0.08 (0.08-0.09)    |
| Southeast Asia           | 0.33 (0.23-0.46)               | 0.13 (0.10-0.18)               | 0.81 (0.57-1.14)               | 0.13 (0.10-0.19)               | 144.97    | 0.01 (0.01-0.02)    |
| Australasia              | 0.78 (0.58-1.02)               | 3.39 (2.55-4.48)               | 1.60 (1.20-2.14)               | 3.49 (2.62-4.64)               | 106.63    | -0.24 (-0.37--0.11) |
| Caribbean                | 0.20 (0.15-0.27)               | 0.77 (0.56-1.04)               | 0.40 (0.30-0.55)               | 0.77 (0.57-1.05)               | 102.72    | 0.02 (0.02-0.02)    |
| Central Europe           | 1.52 (1.13-2.06)               | 1.04 (0.78-1.39)               | 2.11 (1.58-2.83)               | 1.03 (0.77-1.39)               | 39.10     | -0.01 (-0.02--0.01) |
| Eastern Europe           | 13.13 (9.87-17.00)             | 4.71 (3.56-6.06)               | 15.08 (11.42-19.62)            | 4.48 (3.37-5.80)               | 14.90     | -0.83 (-1.1--0.57)  |
| Western Europe           | 13.09 (9.94-17.14)             | 2.37 (1.79-3.11)               | 20.03 (14.91-26.31)            | 2.45 (1.82-3.23)               | 53.02     | 0.29 (0.23-0.35)    |

|                              |                     |                  |                     |                  |        |                     |
|------------------------------|---------------------|------------------|---------------------|------------------|--------|---------------------|
| Andean Latin America         | 0.22 (0.16-0.30)    | 1.07 (0.79-1.44) | 0.65 (0.51-0.84)    | 1.15 (0.90-1.48) | 193.85 | 0.41 (0.33-0.49)    |
| Central Latin America        | 1.30 (0.95-1.74)    | 1.52 (1.14-2.05) | 4.14 (3.09-5.51)    | 1.72 (1.29-2.28) | 219.24 | 0.60 (0.46-0.74)    |
| Southern Latin America       | 1.53 (1.16-2.03)    | 3.32 (2.51-4.38) | 2.70 (2.04-3.57)    | 3.31 (2.50-4.37) | 76.25  | -0.01 (-0.02--0.01) |
| Tropical Latin America       | 0.77 (0.56-1.03)    | 0.84 (0.62-1.13) | 2.08 (1.53-2.78)    | 0.85 (0.63-1.14) | 170.44 | 0.03 (0.03-0.03)    |
| North Africa and Middle East | 1.59 (1.17-2.13)    | 0.90 (0.67-1.21) | 4.28 (3.15-5.73)    | 0.93 (0.70-1.25) | 169.05 | 0.04 (0-0.08)       |
| High-income North America    | 17.24 (13.15-22.26) | 5.21 (3.96-6.76) | 33.35 (25.53-43.28) | 5.61 (4.31-7.24) | 93.49  | 0.27 (0.04-0.5)     |
| Oceania                      | 0.01 (0.01-0.01)    | 0.28 (0.21-0.39) | 0.02 (0.01-0.03)    | 0.28 (0.21-0.39) | 141.11 | -0.01 (-0.01--0.01) |
| Central Sub-Saharan Africa   | 0.40 (0.30-0.53)    | 1.66 (1.25-2.20) | 0.96 (0.71-1.27)    | 1.68 (1.26-2.22) | 141.10 | 0.03 (0.02-0.04)    |
| Eastern Sub-Saharan Africa   | 1.30 (0.97-1.72)    | 1.68 (1.26-2.21) | 2.93 (2.18-3.87)    | 1.69 (1.27-2.23) | 124.75 | 0.04 (0.04-0.04)    |
| Southern Sub-Saharan Africa  | 0.59 (0.44-0.78)    | 2.11 (1.57-2.75) | 1.24 (0.92-1.63)    | 2.12 (1.58-2.77) | 109.21 | 0.02 (0.02-0.03)    |
| Western Sub-Saharan Africa   | 1.51 (1.13-2.00)    | 1.68 (1.26-2.22) | 3.42 (2.53-4.52)    | 1.70 (1.28-2.24) | 125.65 | 0.04 (0.02-0.05)    |

ASR, age-standardized prevalence rate; EAPC, estimated annual percentage change; UI, uncertainty interval; CI, confidential interval.

\* Change in absolute number (%)

Table S4. The prevalent cases and ASR of OA other in 1990 and 2019.

| Characteristics          | 1990                                              |                                                   | 2019                                              |                                                   | 1990-2019      |                      |
|--------------------------|---------------------------------------------------|---------------------------------------------------|---------------------------------------------------|---------------------------------------------------|----------------|----------------------|
|                          | Prevalent cases<br>No. × 10 <sup>6</sup> (95% UI) | ASR per 100 000<br>No. × 10 <sup>2</sup> (95% UI) | Prevalent cases<br>No. × 10 <sup>6</sup> (95% UI) | ASR per 100 000<br>No. × 10 <sup>2</sup> (95% UI) | Change*<br>(%) | EAPC<br>No. (95% CI) |
| Overall                  | 27.60 (20.94-34.93)                               | 7.08 (5.43-8.88)                                  | 61.42 (46.68-77.73)                               | 7.46 (5.70-9.40)                                  | 122.56         | 0.18 (0.18-0.19)     |
| Sex                      |                                                   | 0.00 (0-0)                                        |                                                   | 0.00 (0-0)                                        |                |                      |
| Male                     | 13.50 (10.16-17.24)                               | 7.47 (5.72-9.40)                                  | 30.83 (23.23-39.40)                               | 7.96 (6.07-10.08)                                 | 128.37         | 0.22 (0.21-0.23)     |
| Female                   | 14.10 (10.77-17.71)                               | 6.72 (5.16-8.42)                                  | 30.59 (23.40-38.35)                               | 6.99 (5.35-8.76)                                  | 116.99         | 0.14 (0.14-0.15)     |
| SDI                      |                                                   | 0.00 (0-0)                                        |                                                   | 0.00 (0-0)                                        |                |                      |
| Low SDI                  | 1.55 (1.14-2.01)                                  | 6.79 (5.16-8.59)                                  | 3.54 (2.64-4.58)                                  | 7.00 (5.29-8.87)                                  | 129.02         | 0.11 (0.10-0.11)     |
| Low-middle SDI           | 3.98 (2.96-5.18)                                  | 6.89 (5.23-8.74)                                  | 9.75 (7.28-12.57)                                 | 7.22 (5.46-9.16)                                  | 144.64         | 0.17 (0.16-0.18)     |
| Middle SDI               | 7.12 (5.28-9.21)                                  | 7.11 (5.37-9.00)                                  | 18.91 (14.05-24.39)                               | 7.53 (5.69-9.59)                                  | 165.71         | 0.20 (0.20-0.21)     |
| High-middle SDI          | 7.65 (5.74-9.78)                                  | 7.25 (5.50-9.18)                                  | 15.72 (11.81-20.02)                               | 7.67 (5.78-9.75)                                  | 105.48         | 0.20 (0.19-0.20)     |
| High SDI                 | 7.29 (5.83-8.94)                                  | 7.13 (5.69-8.77)                                  | 13.48 (10.78-16.41)                               | 7.57 (6.01-9.29)                                  | 84.91          | 0.21 (0.19-0.23)     |
| Region                   |                                                   | 0.00 (0-0)                                        |                                                   | 0.00 (0-0)                                        |                |                      |
| High-income Asia Pacific | 1.36 (1.02-1.73)                                  | 6.75 (5.11-8.53)                                  | 2.88 (2.23-3.60)                                  | 6.92 (5.25-8.80)                                  | 111.52         | 0.10 (0.08-0.11)     |
| Central Asia             | 0.33 (0.25-0.42)                                  | 7.19 (5.43-9.13)                                  | 0.56 (0.41-0.72)                                  | 7.50 (5.65-9.61)                                  | 68.35          | 0.11 (0.09-0.12)     |
| East Asia                | 6.00 (4.45-7.74)                                  | 7.02 (5.31-8.9)                                   | 15.79 (11.74-20.28)                               | 7.44 (5.62-9.48)                                  | 163.07         | 0.23 (0.21-0.24)     |
| South Asia               | 3.75 (2.77-4.89)                                  | 6.90 (5.23-8.74)                                  | 10.00 (7.47-12.83)                                | 7.23 (5.47-9.15)                                  | 166.37         | 0.17 (0.16-0.18)     |
| Southeast Asia           | 1.69 (1.26-2.18)                                  | 6.80 (5.14-8.63)                                  | 4.40 (3.26-5.68)                                  | 7.19 (5.44-9.14)                                  | 160.41         | 0.20 (0.18-0.21)     |
| Australasia              | 0.16 (0.12-0.21)                                  | 7.10 (5.40-9.02)                                  | 0.37 (0.28-0.47)                                  | 7.87 (5.96-9.93)                                  | 126.53         | 0.37 (0.34-0.40)     |
| Caribbean                | 0.19 (0.14-0.24)                                  | 7.24 (5.47-9.19)                                  | 0.39 (0.30-0.50)                                  | 7.59 (5.74-9.67)                                  | 112.15         | 0.20 (0.18-0.22)     |
| Central Europe           | 1.10 (0.83-1.41)                                  | 7.52 (5.68-9.58)                                  | 1.65 (1.25-2.08)                                  | 7.95 (5.98-10.19)                                 | 49.71          | 0.19 (0.18-0.20)     |
| Eastern Europe           | 2.08 (1.55-2.67)                                  | 7.51 (5.68-9.54)                                  | 2.73 (2.05-3.48)                                  | 7.94 (6.00-10.12)                                 | 30.91          | 0.19 (0.18-0.20)     |
| Western Europe           | 3.92 (3.01-4.93)                                  | 7.00 (5.36-8.84)                                  | 6.26 (4.81-7.80)                                  | 7.41 (5.64-9.38)                                  | 59.46          | 0.18 (0.16-0.21)     |

|                              |                  |                  |                  |                   |        |                  |
|------------------------------|------------------|------------------|------------------|-------------------|--------|------------------|
| Andean Latin America         | 0.14 (0.11-0.18) | 7.05 (5.31-8.94) | 0.42 (0.32-0.54) | 7.56 (5.70-9.60)  | 197.46 | 0.26 (0.25-0.28) |
| Central Latin America        | 0.62 (0.46-0.8)  | 7.49 (5.67-9.52) | 1.85 (1.39-2.37) | 7.78 (5.88-9.90)  | 199.24 | 0.14 (0.13-0.15) |
| Southern Latin America       | 0.31 (0.23-0.39) | 6.69 (5.10-8.41) | 0.61 (0.47-0.77) | 7.42 (5.66-9.40)  | 99.76  | 0.35 (0.30-0.40) |
| Tropical Latin America       | 0.67 (0.50-0.87) | 7.45 (5.65-9.49) | 1.93 (1.44-2.48) | 7.92 (5.93-10.08) | 189.22 | 0.24 (0.23-0.26) |
| North Africa and Middle East | 1.27 (0.94-1.64) | 7.51 (5.69-9.63) | 3.55 (2.65-4.60) | 8.11 (6.12-10.36) | 179.95 | 0.26 (0.25-0.26) |
| High-income North America    | 2.54 (2.17-2.96) | 7.46 (6.32-8.69) | 4.71 (3.97-5.52) | 8.02 (6.76-9.32)  | 85.05  | 0.27 (0.24-0.29) |
| Oceania                      | 0.02 (0.02-0.03) | 7.06 (5.37-8.98) | 0.05 (0.04-0.07) | 7.24 (5.46-9.31)  | 147.42 | 0.07 (0.03-0.10) |
| Central Sub-Saharan Africa   | 0.15 (0.11-0.19) | 6.71 (5.09-8.53) | 0.36 (0.26-0.46) | 6.83 (5.17-8.66)  | 143.83 | 0.03 (0.00-0.05) |
| Eastern Sub-Saharan Africa   | 0.48 (0.36-0.63) | 6.72 (5.10-8.49) | 1.12 (0.83-1.45) | 7.02 (5.32-8.92)  | 131.44 | 0.15 (0.14-0.16) |
| Southern Sub-Saharan Africa  | 0.21 (0.15-0.27) | 7.72 (5.79-9.83) | 0.45 (0.34-0.59) | 8.09 (6.09-10.32) | 118.33 | 0.17 (0.15-0.18) |
| Western Sub-Saharan Africa   | 0.60 (0.45-0.78) | 7.05 (5.33-8.93) | 1.36 (1.01-1.76) | 7.29 (5.51-9.24)  | 125.17 | 0.06 (0.03-0.09) |

ASR, age-standardized prevalence rate; EAPC, estimated annual percentage change; UI, uncertainty interval; CI, confidential interval.

\* Change in absolute number (%)



Table S5. The prevalent cases and ASR of OA in 1990 and 2019, at national level.

| Nation         | Cause                | Case in 1990 | ASR in 1990 per 100 000 | Case in 2019 | ASR in 2019 per 100 000 | Change in absolute number (%) | EAPC No. (95% CI)   |
|----------------|----------------------|--------------|-------------------------|--------------|-------------------------|-------------------------------|---------------------|
| Afghanistan    | Osteoarthritis       | 328021.32    | 4490.34                 | 665279.11    | 4874.10                 | 102.82                        | 0.34 (0.30-0.38)    |
| Afghanistan    | Osteoarthritis knee  | 228018.59    | 3108.60                 | 471509.69    | 3453.98                 | 106.79                        | 0.43 (0.38-0.48)    |
| Afghanistan    | Osteoarthritis hip   | 12557.57     | 176.67                  | 28301.57     | 209.46                  | 125.37                        | 0.75 (0.62-0.89)    |
| Afghanistan    | Osteoarthritis hand  | 66132.28     | 909.54                  | 124822.14    | 940.59                  | 88.75                         | 0.14 (0.12-0.16)    |
| Afghanistan    | Osteoarthritis other | 47381.48     | 677.15                  | 90337.76     | 726.62                  | 90.66                         | 0.34 (0.28-0.40)    |
| Albania        | Osteoarthritis       | 98583.14     | 4624.62                 | 206968.57    | 4924.42                 | 109.94                        | 0.23 (0.22-0.23)    |
| Albania        | Osteoarthritis knee  | 63884.73     | 2991.00                 | 136993.25    | 3253.70                 | 114.44                        | 0.30 (0.29-0.31)    |
| Albania        | Osteoarthritis hip   | 7341.78      | 345.43                  | 16968.78     | 402.38                  | 131.13                        | 0.58 (0.56-0.61)    |
| Albania        | Osteoarthritis hand  | 21067.92     | 1001.36                 | 42233.28     | 999.64                  | 100.46                        | -0.01 (-0.01--0.01) |
| Albania        | Osteoarthritis other | 14637.81     | 709.20                  | 31742.34     | 745.55                  | 116.85                        | 0.18 (0.17-0.20)    |
| Algeria        | Osteoarthritis       | 608600.60    | 4832.01                 | 1882092.51   | 5320.33                 | 209.25                        | 0.33 (0.32-0.34)    |
| Algeria        | Osteoarthritis knee  | 429793.94    | 3398.28                 | 1362643.82   | 3848.53                 | 217.05                        | 0.43 (0.41-0.44)    |
| Algeria        | Osteoarthritis hip   | 27221.47     | 216.04                  | 98131.52     | 279.67                  | 260.49                        | 0.90 (0.85-0.95)    |
| Algeria        | Osteoarthritis hand  | 115913.19    | 923.87                  | 320516.75    | 914.22                  | 176.51                        | -0.05 (-0.06--0.04) |
| Algeria        | Osteoarthritis other | 88374.10     | 738.03                  | 276497.96    | 816.40                  | 212.87                        | 0.38 (0.36-0.40)    |
| American Samoa | Osteoarthritis       | 1307.65      | 5318.12                 | 2940.26      | 5777.56                 | 124.85                        | 0.22 (0.12-0.32)    |
| American Samoa | Osteoarthritis knee  | 1082.42      | 4350.69                 | 2475.03      | 4819.33                 | 128.66                        | 0.28 (0.18-0.38)    |
| American Samoa | Osteoarthritis hip   | 84.24        | 354.82                  | 194.99       | 400.53                  | 131.47                        | 0.23 (-0.02-0.48)   |
| American Samoa | Osteoarthritis hand  | 63.39        | 282.83                  | 137.58       | 287.03                  | 117.04                        | 0.05 (0.05-0.06)    |
| American Samoa | Osteoarthritis other | 182.31       | 810.41                  | 406.66       | 839.78                  | 123.06                        | 0.07 (-0.02-0.17)   |

|                     |                      |            |         |            |         |        |                     |
|---------------------|----------------------|------------|---------|------------|---------|--------|---------------------|
| Andorra             | Osteoarthritis       | 4645.01    | 8171.75 | 11981.14   | 8536.27 | 157.94 | 0.45 (0.35-0.54)    |
| Andorra             | Osteoarthritis knee  | 2203.38    | 3889.69 | 5932.30    | 4234.68 | 169.24 | 0.29 (0.26-0.32)    |
| Andorra             | Osteoarthritis hip   | 356.49     | 632.21  | 1050.23    | 753.57  | 194.61 | 0.58 (0.48-0.68)    |
| Andorra             | Osteoarthritis hand  | 2493.39    | 4385.06 | 6156.83    | 4375.56 | 146.93 | 0.77 (0.521-0.03)   |
| Andorra             | Osteoarthritis other | 377.39     | 685.00  | 1047.74    | 741.09  | 177.63 | 0.26 (0.21-0.31)    |
| Angola              | Osteoarthritis       | 220307.82  | 5298.07 | 692463.97  | 5650.08 | 214.32 | 0.22 (0.21-0.23)    |
| Angola              | Osteoarthritis knee  | 135381.12  | 3265.04 | 435127.90  | 3567.46 | 221.41 | 0.30 (0.28-0.32)    |
| Angola              | Osteoarthritis hip   | 11156.69   | 276.34  | 38448.41   | 325.30  | 244.62 | 0.58 (0.54-0.61)    |
| Angola              | Osteoarthritis hand  | 68441.67   | 1647.01 | 205391.20  | 1679.78 | 200.10 | 0.07 (0.07-0.07)    |
| Angola              | Osteoarthritis other | 24415.94   | 652.50  | 77005.71   | 695.65  | 215.39 | 0.20 (0.19-0.22)    |
| Antigua and Barbuda | Osteoarthritis       | 2759.24    | 5449.77 | 6133.89    | 5790.39 | 122.30 | 0.21 (0.20-0.22)    |
| Antigua and Barbuda | Osteoarthritis knee  | 2139.17    | 4229.07 | 4843.34    | 4564.78 | 126.41 | 0.27 (0.25-0.28)    |
| Antigua and Barbuda | Osteoarthritis hip   | 145.93     | 281.08  | 342.96     | 330.31  | 135.03 | 0.54 (0.52-0.56)    |
| Antigua and Barbuda | Osteoarthritis hand  | 403.87     | 788.10  | 806.46     | 772.49  | 99.68  | -0.07 (-0.08--0.07) |
| Antigua and Barbuda | Osteoarthritis other | 373.29     | 719.74  | 782.14     | 757.82  | 109.53 | 0.16 (0.15-0.17)    |
| Argentina           | Osteoarthritis       | 2395863.68 | 7416.76 | 4185704.35 | 7980.85 | 74.71  | 0.25 (0.22-0.28)    |
| Argentina           | Osteoarthritis knee  | 1352142.67 | 4171.67 | 2476629.69 | 4701.42 | 83.16  | 0.41 (0.35-0.46)    |
| Argentina           | Osteoarthritis hip   | 161187.25  | 499.66  | 351630.40  | 662.79  | 118.15 | 0.99 (0.88-1.10)    |
| Argentina           | Osteoarthritis hand  | 1071469.47 | 3321.66 | 1741172.63 | 3314.68 | 62.50  | -0.01 (-0.02-0.00)  |
| Argentina           | Osteoarthritis other | 212428.78  | 664.73  | 392317.31  | 738.42  | 84.68  | 0.36 (0.31-0.41)    |
| Armenia             | Osteoarthritis       | 143158.01  | 5177.35 | 226557.05  | 5478.39 | 58.26  | 0.19 (0.19-0.19)    |
| Armenia             | Osteoarthritis knee  | 73263.50   | 2650.58 | 120300.50  | 2905.82 | 64.20  | 0.32 (0.32-0.33)    |
| Armenia             | Osteoarthritis hip   | 9311.47    | 339.83  | 16889.37   | 407.46  | 81.38  | 0.65 (0.64-0.67)    |
| Armenia             | Osteoarthritis hand  | 56350.94   | 2048.55 | 84728.97   | 2041.58 | 50.36  | -0.02 (-0.03--0.01) |

|            |                      |            |         |            |         |        |                     |
|------------|----------------------|------------|---------|------------|---------|--------|---------------------|
| Armenia    | Osteoarthritis other | 18679.98   | 697.60  | 30919.76   | 745.43  | 65.52  | 0.21 (0.20-0.22)    |
| Australia  | Osteoarthritis       | 1464076.23 | 7662.59 | 3195923.45 | 8345.79 | 118.29 | 0.18 (0.13-0.24)    |
| Australia  | Osteoarthritis knee  | 842779.13  | 4378.81 | 1904137.00 | 4929.84 | 125.94 | 0.41 (0.37-0.44)    |
| Australia  | Osteoarthritis hip   | 110171.72  | 569.87  | 299100.84  | 760.15  | 171.49 | 1.00 (0.91-1.09)    |
| Australia  | Osteoarthritis hand  | 638706.92  | 3350.68 | 1339640.65 | 3466.84 | 109.74 | -0.29 (-0.45--0.13) |
| Australia  | Osteoarthritis other | 135363.65  | 704.76  | 311065.85  | 785.15  | 129.80 | 0.39 (0.35-0.42)    |
| Austria    | Osteoarthritis       | 877031.40  | 7928.41 | 1324467.94 | 8252.16 | 51.02  | 0.39 (0.30-0.47)    |
| Austria    | Osteoarthritis knee  | 453299.17  | 4015.17 | 692145.83  | 4238.76 | 52.69  | 0.16 (0.15-0.18)    |
| Austria    | Osteoarthritis hip   | 71594.73   | 630.16  | 120725.10  | 729.42  | 68.62  | 0.47 (0.44-0.51)    |
| Austria    | Osteoarthritis hand  | 433634.78  | 3938.77 | 645887.91  | 4019.45 | 48.95  | 0.77 (0.54-1.00)    |
| Austria    | Osteoarthritis other | 78268.80   | 687.53  | 122753.39  | 731.71  | 56.84  | 0.20 (0.19-0.21)    |
| Azerbaijan | Osteoarthritis       | 277968.40  | 5472.98 | 577741.14  | 5709.92 | 107.84 | 0.26 (0.20-0.32)    |
| Azerbaijan | Osteoarthritis knee  | 136391.80  | 2691.23 | 295876.40  | 2931.23 | 116.93 | 0.31 (0.27-0.34)    |
| Azerbaijan | Osteoarthritis hip   | 17603.97   | 349.50  | 41514.74   | 423.20  | 135.83 | 0.69 (0.63-0.75)    |
| Azerbaijan | Osteoarthritis hand  | 119337.49  | 2365.76 | 229749.58  | 2289.41 | 92.52  | 0.21 (0.02-0.41)    |
| Azerbaijan | Osteoarthritis other | 34992.58   | 706.44  | 72399.39   | 757.22  | 106.90 | 0.23 (0.21-0.25)    |
| Bahamas    | Osteoarthritis       | 8961.51    | 5691.46 | 24506.89   | 5964.58 | 173.47 | 0.16 (0.14-0.18)    |
| Bahamas    | Osteoarthritis knee  | 7004.44    | 4448.91 | 19449.61   | 4730.67 | 177.68 | 0.21 (0.19-0.23)    |
| Bahamas    | Osteoarthritis hip   | 499.53     | 317.09  | 1418.39    | 354.13  | 183.94 | 0.37 (0.32-0.43)    |
| Bahamas    | Osteoarthritis hand  | 1214.69    | 789.93  | 3150.09    | 781.92  | 159.33 | -0.04 (-0.05--0.04) |
| Bahamas    | Osteoarthritis other | 1146.43    | 755.48  | 3077.94    | 775.05  | 168.48 | 0.08 (0.06-0.10)    |
| Bahrain    | Osteoarthritis       | 10515.32   | 5128.21 | 72697.24   | 5471.26 | 591.35 | 0.20 (0.20-0.21)    |
| Bahrain    | Osteoarthritis knee  | 7494.84    | 3660.84 | 52912.74   | 3994.51 | 605.99 | 0.28 (0.27-0.28)    |
| Bahrain    | Osteoarthritis hip   | 582.35     | 269.37  | 4246.73    | 327.28  | 629.24 | 0.62 (0.58-0.66)    |

|            |                      |            |         |            |         |        |                     |
|------------|----------------------|------------|---------|------------|---------|--------|---------------------|
| Bahrain    | Osteoarthritis hand  | 1750.89    | 893.67  | 10625.17   | 846.81  | 506.84 | -0.18 (-0.22--0.15) |
| Bahrain    | Osteoarthritis other | 1508.64    | 809.90  | 10575.92   | 879.36  | 601.02 | 0.26 (0.25-0.28)    |
| Bangladesh | Osteoarthritis       | 2189176.84 | 4520.46 | 6551799.41 | 4875.22 | 199.28 | 0.29 (0.27-0.32)    |
| Bangladesh | Osteoarthritis knee  | 1603686.21 | 3280.79 | 4864039.18 | 3601.73 | 203.30 | 0.36 (0.34-0.39)    |
| Bangladesh | Osteoarthritis hip   | 98571.09   | 197.15  | 338673.03  | 249.88  | 243.58 | 0.93 (0.88-0.99)    |
| Bangladesh | Osteoarthritis hand  | 353924.37  | 758.61  | 1021537.64 | 775.82  | 188.63 | 0.08 (0.06-0.10)    |
| Bangladesh | Osteoarthritis other | 293942.02  | 651.34  | 866839.42  | 670.46  | 194.90 | 0.13 (0.11-0.15)    |
| Barbados   | Osteoarthritis       | 15254.88   | 5673.30 | 28744.11   | 5978.42 | 88.43  | 0.19 (0.17-0.20)    |
| Barbados   | Osteoarthritis knee  | 11948.30   | 4440.88 | 22864.65   | 4744.49 | 91.36  | 0.24 (0.22-0.25)    |
| Barbados   | Osteoarthritis hip   | 865.53     | 311.53  | 1717.50    | 356.90  | 98.43  | 0.48 (0.44-0.51)    |
| Barbados   | Osteoarthritis hand  | 2172.04    | 794.58  | 3778.08    | 779.93  | 73.94  | -0.06 (-0.07--0.06) |
| Barbados   | Osteoarthritis other | 2071.61    | 741.99  | 3793.99    | 777.46  | 83.14  | 0.18 (0.15-0.20)    |
| Belarus    | Osteoarthritis       | 780022.97  | 6011.49 | 977785.59  | 6280.06 | 25.35  | 0.16 (0.15-0.17)    |
| Belarus    | Osteoarthritis knee  | 437210.30  | 3360.95 | 565649.15  | 3621.70 | 29.38  | 0.27 (0.25-0.28)    |
| Belarus    | Osteoarthritis hip   | 48056.67   | 370.98  | 67413.76   | 431.14  | 40.28  | 0.54 (0.50-0.57)    |
| Belarus    | Osteoarthritis hand  | 298947.17  | 2302.31 | 356522.24  | 2279.41 | 19.26  | -0.02 (-0.03--0.02) |
| Belarus    | Osteoarthritis other | 93597.81   | 722.52  | 120813.34  | 764.00  | 29.08  | 0.19 (0.18-0.20)    |
| Belgium    | Osteoarthritis       | 1085999.97 | 7458.56 | 1572855.67 | 7754.98 | 44.83  | 0.26 (0.22-0.30)    |
| Belgium    | Osteoarthritis knee  | 582927.48  | 3949.29 | 863721.28  | 4194.60 | 48.17  | 0.19 (0.17-0.21)    |
| Belgium    | Osteoarthritis hip   | 91905.71   | 618.90  | 149844.21  | 715.55  | 63.04  | 0.47 (0.43-0.50)    |
| Belgium    | Osteoarthritis hand  | 497589.46  | 3412.50 | 698064.04  | 3425.51 | 40.29  | 0.40 (0.27-0.53)    |
| Belgium    | Osteoarthritis other | 101276.40  | 681.42  | 153945.22  | 724.42  | 52.01  | 0.19 (0.17-0.20)    |
| Belize     | Osteoarthritis       | 5069.81    | 5480.04 | 17442.85   | 5995.21 | 244.05 | 0.30 (0.24-0.37)    |
| Belize     | Osteoarthritis knee  | 3935.79    | 4255.41 | 13798.11   | 4748.32 | 250.58 | 0.37 (0.30-0.44)    |

|                                  |                      |           |         |           |         |        |                     |
|----------------------------------|----------------------|-----------|---------|-----------|---------|--------|---------------------|
| Belize                           | Osteoarthritis hip   | 279.33    | 298.76  | 1062.18   | 372.80  | 280.26 | 0.75 (0.56-0.94)    |
| Belize                           | Osteoarthritis hand  | 694.38    | 755.67  | 2148.84   | 753.81  | 209.46 | -0.01 (-0.02-0.00)  |
| Belize                           | Osteoarthritis other | 677.97    | 742.09  | 2225.53   | 798.97  | 228.26 | 0.24 (0.16-0.32)    |
| Benin                            | Osteoarthritis       | 113226.76 | 5596.60 | 312329.15 | 6017.41 | 175.84 | 0.25 (0.22-0.28)    |
| Benin                            | Osteoarthritis knee  | 72672.71  | 3595.94 | 206140.92 | 3988.64 | 183.66 | 0.36 (0.31-0.40)    |
| Benin                            | Osteoarthritis hip   | 5389.54   | 265.45  | 16729.35  | 327.53  | 210.40 | 0.74 (0.66-0.82)    |
| Benin                            | Osteoarthritis hand  | 33424.73  | 1655.49 | 85968.13  | 1664.35 | 157.20 | 0.02 (0.02-0.03)    |
| Benin                            | Osteoarthritis other | 13071.40  | 674.83  | 35241.24  | 731.59  | 169.61 | 0.28 (0.25-0.30)    |
| Bermuda                          | Osteoarthritis       | 3775.70   | 5973.24 | 7529.22   | 6146.12 | 99.41  | 0.09 (0.07-0.11)    |
| Bermuda                          | Osteoarthritis knee  | 2975.07   | 4700.83 | 6003.64   | 4893.87 | 101.80 | 0.13 (0.11-0.15)    |
| Bermuda                          | Osteoarthritis hip   | 230.99    | 365.13  | 479.12    | 388.15  | 107.42 | 0.18 (0.12-0.23)    |
| Bermuda                          | Osteoarthritis hand  | 492.65    | 789.00  | 972.90    | 778.59  | 97.48  | -0.05 (-0.05--0.04) |
| Bermuda                          | Osteoarthritis other | 500.45    | 803.88  | 1018.90   | 807.19  | 103.60 | 0.00 (-0.03-0.03)   |
| Bhutan                           | Osteoarthritis       | 12374.50  | 4764.03 | 30281.54  | 5188.65 | 144.71 | 0.32 (0.31-0.34)    |
| Bhutan                           | Osteoarthritis knee  | 9165.11   | 3486.17 | 22728.81  | 3875.84 | 147.99 | 0.40 (0.38-0.42)    |
| Bhutan                           | Osteoarthritis hip   | 600.61    | 225.62  | 1780.15   | 299.33  | 196.39 | 1.07 (1.01-1.13)    |
| Bhutan                           | Osteoarthritis hand  | 1946.31   | 797.35  | 4404.43   | 778.12  | 126.30 | -0.08 (-0.10--0.06) |
| Bhutan                           | Osteoarthritis other | 1574.33   | 665.18  | 3982.40   | 716.25  | 152.96 | 0.28 (0.25-0.32)    |
| Bolivia (Plurinational State of) | Osteoarthritis       | 179928.03 | 5451.46 | 539653.58 | 5924.48 | 199.93 | 0.29 (0.28-0.30)    |
| Bolivia (Plurinational State of) | Osteoarthritis knee  | 131603.75 | 3980.44 | 405620.54 | 4446.90 | 208.21 | 0.39 (0.37-0.40)    |
| Bolivia (Plurinational State of) | Osteoarthritis hip   | 7898.12   | 240.37  | 27032.92  | 299.32  | 242.27 | 0.78 (0.75-0.82)    |
| Bolivia (Plurinational State of) | Osteoarthritis hand  | 37121.80  | 1148.87 | 102002.40 | 1136.23 | 174.78 | -0.03 (-0.04--0.03) |
| Bolivia (Plurinational State of) | Osteoarthritis other | 21144.12  | 674.13  | 64695.38  | 734.59  | 205.97 | 0.32 (0.30-0.34)    |
| Bosnia and Herzegovina           | Osteoarthritis       | 197798.79 | 4653.35 | 288181.49 | 4960.90 | 45.69  | 0.23 (0.20-0.26)    |

|                        |                      |            |         |             |         |        |                     |
|------------------------|----------------------|------------|---------|-------------|---------|--------|---------------------|
| Bosnia and Herzegovina | Osteoarthritis knee  | 129033.71  | 3023.52 | 191402.39   | 3285.04 | 48.34  | 0.29 (0.26-0.32)    |
| Bosnia and Herzegovina | Osteoarthritis hip   | 14438.68   | 346.06  | 23790.01    | 408.61  | 64.77  | 0.62 (0.53-0.70)    |
| Bosnia and Herzegovina | Osteoarthritis hand  | 42227.75   | 1008.19 | 58581.37    | 1004.33 | 38.73  | -0.01 (-0.01--0.01) |
| Bosnia and Herzegovina | Osteoarthritis other | 28688.89   | 702.65  | 44034.52    | 750.71  | 53.49  | 0.23 (0.18-0.28)    |
| Botswana               | Osteoarthritis       | 35326.08   | 5937.12 | 96708.27    | 6455.22 | 173.76 | 0.27 (0.25-0.28)    |
| Botswana               | Osteoarthritis knee  | 20881.22   | 3526.30 | 58896.60    | 3984.55 | 182.06 | 0.39 (0.37-0.41)    |
| Botswana               | Osteoarthritis hip   | 1967.61    | 334.96  | 6413.22     | 438.90  | 225.94 | 0.85 (0.78-0.92)    |
| Botswana               | Osteoarthritis hand  | 12205.46   | 2041.47 | 31003.21    | 2048.19 | 154.01 | 0.02 (0.01-0.03)    |
| Botswana               | Osteoarthritis other | 3913.90    | 702.90  | 10773.58    | 782.23  | 175.26 | 0.33 (0.30-0.37)    |
| Brazil                 | Osteoarthritis       | 4963040.04 | 5417.24 | 14185138.43 | 5874.22 | 185.82 | 0.30 (0.29-0.31)    |
| Brazil                 | Osteoarthritis knee  | 3783203.46 | 4117.73 | 11016487.87 | 4557.87 | 191.19 | 0.37 (0.36-0.38)    |
| Brazil                 | Osteoarthritis hip   | 260275.58  | 283.78  | 825157.10   | 343.93  | 217.03 | 0.70 (0.68-0.72)    |
| Brazil                 | Osteoarthritis hand  | 751497.92  | 844.26  | 2035479.96  | 851.31  | 170.86 | 0.03 (0.03-0.03)    |
| Brazil                 | Osteoarthritis other | 652728.94  | 746.08  | 1891603.24  | 793.43  | 189.80 | 0.24 (0.23-0.26)    |
| Brunei Darussalam      | Osteoarthritis       | 8751.55    | 8276.66 | 30287.81    | 8743.52 | 246.08 | 0.19 (0.18-0.20)    |
| Brunei Darussalam      | Osteoarthritis knee  | 5672.37    | 5540.52 | 19951.89    | 5953.91 | 251.74 | 0.26 (0.24-0.27)    |
| Brunei Darussalam      | Osteoarthritis hip   | 429.55     | 409.62  | 1616.81     | 492.94  | 276.40 | 0.67 (0.60-0.75)    |
| Brunei Darussalam      | Osteoarthritis hand  | 3503.67    | 3451.26 | 11971.05    | 3544.87 | 241.67 | 0.09 (0.07-0.10)    |
| Brunei Darussalam      | Osteoarthritis other | 634.17     | 644.02  | 2205.79     | 692.62  | 247.82 | 0.29 (0.26-0.32)    |
| Bulgaria               | Osteoarthritis       | 611077.10  | 4926.38 | 688536.02   | 5107.65 | 12.68  | 0.09 (0.08-0.11)    |
| Bulgaria               | Osteoarthritis knee  | 402752.90  | 3230.10 | 458194.73   | 3392.82 | 13.77  | 0.13 (0.12-0.15)    |
| Bulgaria               | Osteoarthritis hip   | 51240.83   | 413.34  | 60772.40    | 443.44  | 18.60  | 0.17 (0.13-0.21)    |
| Bulgaria               | Osteoarthritis hand  | 123808.44  | 1002.47 | 137491.58   | 1006.03 | 11.05  | 0.01 (0.01-0.01)    |
| Bulgaria               | Osteoarthritis other | 93303.68   | 758.78  | 108371.53   | 780.42  | 16.15  | 0.06 (0.04-0.08)    |

|              |                      |           |         |           |         |        |                     |
|--------------|----------------------|-----------|---------|-----------|---------|--------|---------------------|
| Burkina Faso | Osteoarthritis       | 249694.93 | 5512.85 | 569082.83 | 5830.78 | 127.91 | 0.19 (0.18-0.20)    |
| Burkina Faso | Osteoarthritis knee  | 159965.15 | 3519.88 | 371491.74 | 3816.05 | 132.23 | 0.27 (0.26-0.29)    |
| Burkina Faso | Osteoarthritis hip   | 11138.63  | 250.43  | 28058.51  | 293.14  | 151.90 | 0.54 (0.51-0.57)    |
| Burkina Faso | Osteoarthritis hand  | 74784.47  | 1658.84 | 162877.59 | 1676.23 | 117.80 | 0.04 (0.03-0.04)    |
| Burkina Faso | Osteoarthritis other | 28009.95  | 660.69  | 62771.85  | 697.27  | 124.11 | 0.15 (0.13-0.16)    |
| Burundi      | Osteoarthritis       | 126232.98 | 5323.90 | 261844.59 | 5337.80 | 107.43 | 0.01 (0.00-0.01)    |
| Burundi      | Osteoarthritis knee  | 77564.46  | 3272.56 | 162009.70 | 3314.20 | 108.87 | 0.04 (0.03-0.05)    |
| Burundi      | Osteoarthritis hip   | 6481.22   | 273.34  | 13647.06  | 284.72  | 110.56 | 0.15 (0.14-0.16)    |
| Burundi      | Osteoarthritis hand  | 39663.30  | 1676.03 | 79869.10  | 1628.28 | 101.37 | -0.11 (-0.11--0.11) |
| Burundi      | Osteoarthritis other | 14552.28  | 648.95  | 29466.24  | 659.36  | 102.49 | 0.06 (0.05-0.07)    |
| Cabo Verde   | Osteoarthritis       | 12414.57  | 5701.39 | 26750.61  | 6069.30 | 115.48 | 0.21 (0.19-0.22)    |
| Cabo Verde   | Osteoarthritis knee  | 8020.85   | 3675.04 | 17703.57  | 4030.03 | 120.72 | 0.31 (0.28-0.33)    |
| Cabo Verde   | Osteoarthritis hip   | 603.08    | 270.70  | 1454.62   | 333.00  | 141.20 | 0.72 (0.69-0.74)    |
| Cabo Verde   | Osteoarthritis hand  | 3694.39   | 1698.45 | 7406.27   | 1682.94 | 100.47 | -0.03 (-0.05--0.01) |
| Cabo Verde   | Osteoarthritis other | 1519.91   | 674.44  | 3141.46   | 733.85  | 106.69 | 0.27 (0.26-0.29)    |
| Cambodia     | Osteoarthritis       | 172446.42 | 3693.47 | 491568.55 | 3933.21 | 185.06 | 0.23 (0.22-0.24)    |
| Cambodia     | Osteoarthritis knee  | 140138.02 | 2957.02 | 403652.18 | 3194.51 | 188.04 | 0.28 (0.27-0.30)    |
| Cambodia     | Osteoarthritis hip   | 8859.80   | 193.56  | 25812.82  | 211.12  | 191.35 | 0.32 (0.29-0.35)    |
| Cambodia     | Osteoarthritis hand  | 5370.15   | 125.46  | 14680.13  | 126.89  | 173.37 | 0.04 (0.04-0.05)    |
| Cambodia     | Osteoarthritis other | 27849.36  | 647.55  | 77768.39  | 662.31  | 179.25 | 0.08 (0.07-0.10)    |
| Cameroon     | Osteoarthritis       | 279718.57 | 5929.10 | 792407.36 | 6176.23 | 183.29 | 0.12 (0.11-0.13)    |
| Cameroon     | Osteoarthritis knee  | 183991.97 | 3897.26 | 527621.39 | 4128.66 | 186.76 | 0.17 (0.16-0.18)    |
| Cameroon     | Osteoarthritis hip   | 14943.20  | 324.29  | 45675.23  | 362.59  | 205.66 | 0.32 (0.30-0.35)    |
| Cameroon     | Osteoarthritis hand  | 77359.43  | 1649.92 | 210791.68 | 1654.57 | 172.48 | 0.01 (0.01-0.01)    |

|                          |                      |             |         |              |         |        |                     |
|--------------------------|----------------------|-------------|---------|--------------|---------|--------|---------------------|
| Cameroon                 | Osteoarthritis other | 31940.03    | 729.71  | 90297.58     | 763.99  | 182.71 | 0.11 (0.10-0.13)    |
| Canada                   | Osteoarthritis       | 2271140.94  | 7190.60 | 4794026.02   | 7580.81 | 111.08 | 0.12 (0.09-0.15)    |
| Canada                   | Osteoarthritis knee  | 767567.59   | 2411.08 | 1757612.74   | 2752.75 | 128.98 | 0.27 (0.19-0.36)    |
| Canada                   | Osteoarthritis hip   | 143998.26   | 449.31  | 389970.87    | 599.15  | 170.82 | 0.61 (0.43-0.79)    |
| Canada                   | Osteoarthritis hand  | 1488351.95  | 4718.18 | 2988073.08   | 4682.43 | 100.76 | -0.03 (-0.03--0.03) |
| Canada                   | Osteoarthritis other | 220899.45   | 692.88  | 492023.40    | 760.81  | 122.74 | 0.33 (0.29-0.37)    |
| Central African Republic | Osteoarthritis       | 65324.77    | 5341.38 | 127870.50    | 5470.25 | 95.75  | 0.08 (0.08-0.09)    |
| Central African Republic | Osteoarthritis knee  | 40195.50    | 3287.16 | 79345.08     | 3410.71 | 97.40  | 0.13 (0.12-0.14)    |
| Central African Republic | Osteoarthritis hip   | 3267.73     | 275.07  | 6588.71      | 292.70  | 101.63 | 0.22 (0.19-0.25)    |
| Central African Republic | Osteoarthritis hand  | 20444.60    | 1679.35 | 39219.79     | 1686.35 | 91.83  | 0.01 (0.01-0.01)    |
| Central African Republic | Osteoarthritis other | 7254.31     | 652.41  | 13905.73     | 663.09  | 91.69  | 0.06 (0.05-0.08)    |
| Chad                     | Osteoarthritis       | 153864.30   | 5414.11 | 330122.09    | 5538.31 | 114.55 | 0.06 (0.05-0.07)    |
| Chad                     | Osteoarthritis knee  | 97482.56    | 3425.18 | 212102.87    | 3567.03 | 117.58 | 0.12 (0.11-0.14)    |
| Chad                     | Osteoarthritis hip   | 6737.61     | 236.76  | 15295.28     | 261.60  | 127.01 | 0.32 (0.29-0.34)    |
| Chad                     | Osteoarthritis hand  | 46893.86    | 1656.38 | 96070.75     | 1612.73 | 104.87 | -0.10 (-0.10--0.10) |
| Chad                     | Osteoarthritis other | 17820.83    | 651.67  | 37367.12     | 679.58  | 109.68 | 0.13 (0.11-0.14)    |
| Chile                    | Osteoarthritis       | 766781.53   | 7532.08 | 1933076.33   | 8072.63 | 152.10 | 0.22 (0.19-0.25)    |
| Chile                    | Osteoarthritis knee  | 435347.73   | 4286.01 | 1150849.14   | 4798.71 | 164.35 | 0.35 (0.31-0.40)    |
| Chile                    | Osteoarthritis hip   | 53585.52    | 531.79  | 167034.38    | 697.21  | 211.72 | 0.89 (0.78-1.00)    |
| Chile                    | Osteoarthritis hand  | 335002.97   | 3308.47 | 792382.47    | 3295.01 | 136.53 | -0.02 (-0.02--0.01) |
| Chile                    | Osteoarthritis other | 67629.78    | 682.53  | 179816.50    | 749.71  | 165.88 | 0.31 (0.27-0.34)    |
| China                    | Osteoarthritis       | 51760492.05 | 5880.58 | 132807005.69 | 6330.06 | 156.58 | 0.35 (0.28-0.43)    |
| China                    | Osteoarthritis knee  | 42570836.35 | 4797.01 | 108120120.28 | 5125.46 | 153.98 | 0.48 (0.36-0.60)    |
| China                    | Osteoarthritis hip   | 1503678.41  | 172.51  | 4787069.27   | 234.09  | 218.36 | 1.16 (1.06-1.26)    |



|              |                      |            |         |             |         |        |                     |
|--------------|----------------------|------------|---------|-------------|---------|--------|---------------------|
| China        | Osteoarthritis hand  | 6989896.87 | 828.04  | 19637407.60 | 953.81  | 180.94 | -0.15 (-0.50-0.21)  |
| China        | Osteoarthritis other | 5784078.04 | 702.35  | 15280407.08 | 745.83  | 164.18 | 0.23 (0.21-0.25)    |
| Colombia     | Osteoarthritis       | 978226.50  | 5383.09 | 3076273.19  | 5793.29 | 214.47 | 0.25 (0.24-0.26)    |
| Colombia     | Osteoarthritis knee  | 748077.16  | 4111.59 | 2399873.10  | 4524.47 | 220.81 | 0.33 (0.32-0.34)    |
| Colombia     | Osteoarthritis hip   | 43800.77   | 240.68  | 148847.12   | 281.42  | 239.83 | 0.51 (0.49-0.54)    |
| Colombia     | Osteoarthritis hand  | 154221.42  | 867.64  | 468499.31   | 879.44  | 203.78 | 0.05 (0.05-0.05)    |
| Colombia     | Osteoarthritis other | 124148.04  | 715.97  | 396096.27   | 743.77  | 219.05 | 0.13 (0.12-0.14)    |
| Comoros      | Osteoarthritis       | 12180.05   | 5411.70 | 28375.15    | 5635.71 | 132.96 | 0.14 (0.13-0.14)    |
| Comoros      | Osteoarthritis knee  | 7572.38    | 3362.55 | 17911.30    | 3564.76 | 136.53 | 0.20 (0.19-0.21)    |
| Comoros      | Osteoarthritis hip   | 660.96     | 295.87  | 1627.81     | 328.11  | 146.28 | 0.37 (0.36-0.37)    |
| Comoros      | Osteoarthritis hand  | 3710.33    | 1652.20 | 8396.51     | 1669.70 | 126.30 | 0.03 (0.03-0.04)    |
| Comoros      | Osteoarthritis other | 1433.41    | 665.91  | 3310.07     | 687.24  | 130.92 | 0.11 (0.10-0.12)    |
| Congo        | Osteoarthritis       | 61315.79   | 5568.52 | 167309.62   | 5814.67 | 172.87 | 0.14 (0.13-0.14)    |
| Congo        | Osteoarthritis knee  | 38470.92   | 3487.90 | 106366.44   | 3720.74 | 176.49 | 0.20 (0.20-0.21)    |
| Congo        | Osteoarthritis hip   | 3407.74    | 314.66  | 10219.68    | 368.55  | 199.90 | 0.55 (0.54-0.56)    |
| Congo        | Osteoarthritis hand  | 18467.41   | 1687.20 | 47513.45    | 1654.86 | 157.28 | -0.07 (-0.08--0.07) |
| Congo        | Osteoarthritis other | 6977.77    | 680.89  | 19077.61    | 728.20  | 173.41 | 0.22 (0.21-0.24)    |
| Cook Islands | Osteoarthritis       | 673.42     | 5117.32 | 1424.99     | 5780.73 | 111.61 | 0.37 (0.31-0.44)    |
| Cook Islands | Osteoarthritis knee  | 551.49     | 4156.98 | 1185.19     | 4800.74 | 114.91 | 0.45 (0.39-0.52)    |
| Cook Islands | Osteoarthritis hip   | 41.96      | 326.57  | 99.53       | 405.30  | 137.20 | 0.58 (0.42-0.74)    |
| Cook Islands | Osteoarthritis hand  | 34.90      | 279.73  | 70.23       | 285.60  | 101.25 | 0.08 (0.07-0.10)    |
| Cook Islands | Osteoarthritis other | 100.29     | 799.47  | 213.38      | 857.99  | 112.77 | 0.19 (0.13-0.24)    |
| Costa Rica   | Osteoarthritis       | 97109.08   | 5493.74 | 308123.28   | 5911.13 | 217.30 | 0.25 (0.24-0.26)    |
| Costa Rica   | Osteoarthritis knee  | 74553.95   | 4217.94 | 241477.41   | 4634.44 | 223.90 | 0.32 (0.31-0.33)    |

|               |                      |           |         |            |         |        |                     |
|---------------|----------------------|-----------|---------|------------|---------|--------|---------------------|
| Costa Rica    | Osteoarthritis hip   | 4587.84   | 256.46  | 15533.01   | 299.50  | 238.57 | 0.52 (0.49-0.54)    |
| Costa Rica    | Osteoarthritis hand  | 15125.79  | 867.07  | 45672.81   | 876.83  | 201.95 | 0.04 (0.04-0.04)    |
| Costa Rica    | Osteoarthritis other | 12554.63  | 727.58  | 39598.16   | 763.73  | 215.41 | 0.17 (0.16-0.18)    |
| Croatia       | Osteoarthritis       | 317337.01 | 4918.90 | 411441.87  | 5099.30 | 29.65  | 0.13 (0.12-0.15)    |
| Croatia       | Osteoarthritis knee  | 205674.93 | 3179.24 | 273396.32  | 3386.71 | 32.93  | 0.24 (0.21-0.26)    |
| Croatia       | Osteoarthritis hip   | 24906.36  | 388.43  | 36242.05   | 442.59  | 45.51  | 0.52 (0.47-0.56)    |
| Croatia       | Osteoarthritis hand  | 70631.54  | 1097.42 | 82410.43   | 1005.54 | 16.68  | -0.34 (-0.43--0.25) |
| Croatia       | Osteoarthritis other | 47019.72  | 736.21  | 64962.48   | 778.70  | 38.16  | 0.21 (0.19-0.24)    |
| Cuba          | Osteoarthritis       | 548240.52 | 5375.50 | 1083246.03 | 5806.12 | 97.59  | 0.29 (0.28-0.31)    |
| Cuba          | Osteoarthritis knee  | 424993.02 | 4162.16 | 856022.42  | 4589.21 | 101.42 | 0.37 (0.35-0.39)    |
| Cuba          | Osteoarthritis hip   | 28689.23  | 280.73  | 61878.59   | 333.79  | 115.69 | 0.66 (0.62-0.71)    |
| Cuba          | Osteoarthritis hand  | 77308.55  | 760.85  | 145245.18  | 770.61  | 87.88  | 0.04 (0.04-0.04)    |
| Cuba          | Osteoarthritis other | 73336.78  | 721.59  | 142706.23  | 752.62  | 94.59  | 0.18 (0.16-0.21)    |
| Cyprus        | Osteoarthritis       | 61662.72  | 7514.05 | 148990.14  | 7904.88 | 141.62 | 0.36 (0.29-0.43)    |
| Cyprus        | Osteoarthritis knee  | 31365.05  | 3781.57 | 78594.12   | 4131.06 | 150.58 | 0.31 (0.28-0.34)    |
| Cyprus        | Osteoarthritis hip   | 4675.15   | 565.67  | 13150.16   | 688.27  | 181.28 | 0.72 (0.65-0.79)    |
| Cyprus        | Osteoarthritis hand  | 30325.44  | 3711.36 | 70070.40   | 3713.87 | 131.06 | 0.49 (0.33-0.65)    |
| Cyprus        | Osteoarthritis other | 5319.22   | 658.40  | 13589.39   | 717.31  | 155.48 | 0.34 (0.30-0.38)    |
| Czechia       | Osteoarthritis       | 658298.65 | 4888.61 | 998519.38  | 5143.35 | 51.68  | 0.16 (0.15-0.17)    |
| Czechia       | Osteoarthritis knee  | 432651.62 | 3206.61 | 664510.94  | 3420.35 | 53.59  | 0.20 (0.19-0.22)    |
| Czechia       | Osteoarthritis hip   | 53960.01  | 398.52  | 89701.42   | 454.77  | 66.24  | 0.44 (0.41-0.47)    |
| Czechia       | Osteoarthritis hand  | 136231.64 | 1010.57 | 197523.57  | 1003.87 | 44.99  | -0.02 (-0.03--0.02) |
| Czechia       | Osteoarthritis other | 100977.63 | 746.03  | 157527.17  | 788.50  | 56.00  | 0.19 (0.17-0.21)    |
| Côte d'Ivoire | Osteoarthritis       | 248094.77 | 5620.24 | 689044.10  | 5878.34 | 177.73 | 0.13 (0.11-0.14)    |

|                                       |                      |           |         |            |         |        |                     |
|---------------------------------------|----------------------|-----------|---------|------------|---------|--------|---------------------|
| Côte d'Ivoire                         | Osteoarthritis knee  | 159747.79 | 3626.10 | 452380.70  | 3878.08 | 183.18 | 0.19 (0.16-0.21)    |
| Côte d'Ivoire                         | Osteoarthritis hip   | 12055.61  | 280.22  | 36069.93   | 315.01  | 199.20 | 0.35 (0.31-0.38)    |
| Côte d'Ivoire                         | Osteoarthritis hand  | 71062.26  | 1617.45 | 189596.16  | 1626.24 | 166.80 | 0.02 (0.01-0.03)    |
| Côte d'Ivoire                         | Osteoarthritis other | 27532.68  | 698.55  | 76413.73   | 721.09  | 177.54 | 0.10 (0.09-0.11)    |
| Democratic People's Republic of Korea | Osteoarthritis       | 987463.11 | 5718.37 | 1940068.53 | 5866.04 | 96.47  | 0.09 (0.08-0.10)    |
| Democratic People's Republic of Korea | Osteoarthritis knee  | 802944.72 | 4595.28 | 1588042.66 | 4780.87 | 97.78  | 0.14 (0.13-0.16)    |
| Democratic People's Republic of Korea | Osteoarthritis hip   | 28810.88  | 175.65  | 57575.69   | 178.58  | 99.84  | 0.04 (0.02-0.06)    |
| Democratic People's Republic of Korea | Osteoarthritis hand  | 140994.86 | 860.46  | 278952.97  | 859.64  | 97.85  | 0.00 (0.00-0.00)    |
| Democratic People's Republic of Korea | Osteoarthritis other | 103835.31 | 658.90  | 208919.77  | 651.15  | 101.20 | -0.06 (-0.07--0.04) |
| Democratic Republic of the Congo      | Osteoarthritis       | 909911.69 | 5442.32 | 2114034.10 | 5525.17 | 132.33 | 0.01 (-0.01-0.03)   |
| Democratic Republic of the Congo      | Osteoarthritis knee  | 565778.21 | 3378.30 | 1319207.80 | 3461.43 | 133.17 | 0.03 (0.00-0.05)    |
| Democratic Republic of the Congo      | Osteoarthritis hip   | 48155.93  | 296.02  | 112779.61  | 302.34  | 134.20 | -0.05 (-0.11-0.01)  |
| Democratic Republic of the Congo      | Osteoarthritis hand  | 277930.19 | 1663.17 | 640638.75  | 1680.68 | 130.50 | 0.03 (0.02-0.05)    |
| Democratic Republic of the Congo      | Osteoarthritis other | 103131.37 | 675.60  | 236356.44  | 673.90  | 129.18 | -0.06 (-0.09--0.03) |
| Denmark                               | Osteoarthritis       | 603424.17 | 8050.81 | 812568.50  | 7875.60 | 34.66  | 0.02 (-0.02-0.06)   |
| Denmark                               | Osteoarthritis knee  | 289502.62 | 3788.46 | 425984.57  | 4050.00 | 47.14  | 0.18 (0.13-0.23)    |
| Denmark                               | Osteoarthritis hip   | 67051.37  | 872.37  | 82899.63   | 777.57  | 23.64  | -0.52 (-0.78--0.27) |
| Denmark                               | Osteoarthritis hand  | 312539.64 | 4172.00 | 384579.83  | 3708.58 | 23.05  | -0.08 (-0.18-0.02)  |
| Denmark                               | Osteoarthritis other | 52451.76  | 676.34  | 77059.59   | 717.92  | 46.92  | 0.22 (0.21-0.24)    |
| Djibouti                              | Osteoarthritis       | 8287.30   | 5298.94 | 38015.09   | 5653.35 | 358.71 | 0.25 (0.24-0.26)    |
| Djibouti                              | Osteoarthritis knee  | 5073.85   | 3266.19 | 23927.12   | 3581.65 | 371.58 | 0.36 (0.34-0.37)    |
| Djibouti                              | Osteoarthritis hip   | 424.46    | 278.93  | 2274.74    | 350.78  | 435.91 | 0.89 (0.85-0.92)    |
| Djibouti                              | Osteoarthritis hand  | 2565.89   | 1639.84 | 10844.01   | 1613.12 | 322.62 | -0.06 (-0.06--0.06) |
| Djibouti                              | Osteoarthritis other | 908.50    | 659.06  | 4391.17    | 726.39  | 383.34 | 0.39 (0.37-0.41)    |

|                    |                      |            |         |            |         |        |                     |
|--------------------|----------------------|------------|---------|------------|---------|--------|---------------------|
| Dominica           | Osteoarthritis       | 3671.80    | 5502.90 | 5143.70    | 5768.30 | 40.09  | 0.14 (0.13-0.16)    |
| Dominica           | Osteoarthritis knee  | 2862.81    | 4284.19 | 4061.93    | 4551.92 | 41.89  | 0.18 (0.17-0.20)    |
| Dominica           | Osteoarthritis hip   | 194.06     | 283.29  | 295.67     | 332.30  | 52.36  | 0.54 (0.48-0.60)    |
| Dominica           | Osteoarthritis hand  | 540.00     | 798.87  | 679.73     | 758.45  | 25.88  | -0.21 (-0.23--0.20) |
| Dominica           | Osteoarthritis other | 493.64     | 714.79  | 681.27     | 756.39  | 38.01  | 0.20 (0.17-0.23)    |
| Dominican Republic | Osteoarthritis       | 202105.51  | 5301.47 | 552587.76  | 5834.98 | 173.42 | 0.36 (0.34-0.37)    |
| Dominican Republic | Osteoarthritis knee  | 156307.09  | 4094.00 | 436293.75  | 4607.07 | 179.13 | 0.44 (0.42-0.46)    |
| Dominican Republic | Osteoarthritis hip   | 10252.27   | 269.42  | 31886.13   | 339.46  | 211.02 | 0.88 (0.84-0.93)    |
| Dominican Republic | Osteoarthritis hand  | 28454.59   | 760.15  | 71755.01   | 766.29  | 152.17 | 0.01 (0.01-0.02)    |
| Dominican Republic | Osteoarthritis other | 26030.79   | 710.91  | 71248.88   | 767.71  | 173.71 | 0.28 (0.27-0.30)    |
| Ecuador            | Osteoarthritis       | 337121.20  | 6160.70 | 1062015.78 | 6886.94 | 215.02 | 0.39 (0.37-0.41)    |
| Ecuador            | Osteoarthritis knee  | 236041.17  | 4317.43 | 753688.81  | 4888.78 | 219.30 | 0.40 (0.38-0.42)    |
| Ecuador            | Osteoarthritis hip   | 16518.41   | 303.35  | 55186.50   | 360.55  | 234.09 | 0.48 (0.41-0.55)    |
| Ecuador            | Osteoarthritis hand  | 85646.43   | 1581.93 | 282738.92  | 1843.89 | 230.12 | 0.71 (0.58-0.85)    |
| Ecuador            | Osteoarthritis other | 38806.72   | 737.85  | 118460.81  | 783.55  | 205.26 | 0.17 (0.14-0.20)    |
| Egypt              | Osteoarthritis       | 1523478.87 | 4999.93 | 3656547.60 | 5374.08 | 140.01 | 0.17 (0.14-0.21)    |
| Egypt              | Osteoarthritis knee  | 1084476.85 | 3551.55 | 2664808.79 | 3911.92 | 145.72 | 0.24 (0.19-0.28)    |
| Egypt              | Osteoarthritis hip   | 72586.48   | 239.45  | 197618.22  | 295.47  | 172.25 | 0.50 (0.40-0.60)    |
| Egypt              | Osteoarthritis hand  | 277400.60  | 923.43  | 598457.75  | 885.58  | 115.74 | -0.15 (-0.16--0.15) |
| Egypt              | Osteoarthritis other | 219332.34  | 762.79  | 528464.99  | 827.30  | 140.94 | 0.21 (0.17-0.25)    |
| El Salvador        | Osteoarthritis       | 161482.26  | 5410.53 | 345321.65  | 5900.70 | 113.84 | 0.30 (0.27-0.34)    |
| El Salvador        | Osteoarthritis knee  | 123600.07  | 4141.38 | 270408.58  | 4629.82 | 118.78 | 0.39 (0.35-0.43)    |
| El Salvador        | Osteoarthritis hip   | 7193.54    | 240.44  | 16957.70   | 288.58  | 135.74 | 0.62 (0.52-0.72)    |
| El Salvador        | Osteoarthritis hand  | 25885.58   | 875.97  | 52506.58   | 892.64  | 102.84 | 0.07 (0.07-0.07)    |

|                   |                      |            |         |            |         |        |                     |
|-------------------|----------------------|------------|---------|------------|---------|--------|---------------------|
| El Salvador       | Osteoarthritis other | 20701.57   | 708.52  | 44233.69   | 748.35  | 113.67 | 0.18 (0.15-0.22)    |
| Equatorial Guinea | Osteoarthritis       | 11043.91   | 5377.02 | 31251.62   | 6025.04 | 182.98 | 0.46 (0.43-0.49)    |
| Equatorial Guinea | Osteoarthritis knee  | 6819.44    | 3316.83 | 20011.71   | 3888.39 | 193.45 | 0.64 (0.60-0.68)    |
| Equatorial Guinea | Osteoarthritis hip   | 557.46     | 278.61  | 2037.46    | 398.34  | 265.49 | 1.48 (1.38-1.59)    |
| Equatorial Guinea | Osteoarthritis hand  | 3454.94    | 1689.42 | 8794.17    | 1700.75 | 154.54 | 0.01 (0.00-0.03)    |
| Equatorial Guinea | Osteoarthritis other | 1237.35    | 650.81  | 3549.21    | 743.68  | 186.84 | 0.55 (0.50-0.59)    |
| Eritrea           | Osteoarthritis       | 56287.28   | 5284.29 | 159053.98  | 5464.78 | 182.58 | 0.11 (0.09-0.13)    |
| Eritrea           | Osteoarthritis knee  | 34113.59   | 3216.57 | 98073.44   | 3387.71 | 187.49 | 0.17 (0.14-0.20)    |
| Eritrea           | Osteoarthritis hip   | 2653.50    | 257.54  | 8131.49    | 286.91  | 206.44 | 0.35 (0.30-0.41)    |
| Eritrea           | Osteoarthritis hand  | 18156.17   | 1713.24 | 49260.90   | 1702.70 | 171.32 | -0.02 (-0.03--0.01) |
| Eritrea           | Osteoarthritis other | 6049.43    | 641.24  | 17495.32   | 668.30  | 189.21 | 0.14 (0.11-0.16)    |
| Estonia           | Osteoarthritis       | 123834.57  | 6086.79 | 150839.92  | 6348.65 | 21.81  | 0.17 (0.15-0.18)    |
| Estonia           | Osteoarthritis knee  | 69970.98   | 3428.09 | 88142.96   | 3691.64 | 25.97  | 0.29 (0.26-0.32)    |
| Estonia           | Osteoarthritis hip   | 7876.59    | 387.22  | 11036.50   | 454.84  | 40.12  | 0.65 (0.61-0.69)    |
| Estonia           | Osteoarthritis hand  | 46904.10   | 2304.63 | 54228.62   | 2254.20 | 15.62  | -0.07 (-0.07--0.06) |
| Estonia           | Osteoarthritis other | 14950.60   | 733.48  | 19461.75   | 782.19  | 30.17  | 0.24 (0.23-0.25)    |
| Eswatini          | Osteoarthritis       | 19539.14   | 6261.17 | 40213.00   | 6603.84 | 105.81 | 0.12 (0.06-0.19)    |
| Eswatini          | Osteoarthritis knee  | 11751.18   | 3812.15 | 24839.88   | 4118.07 | 111.38 | 0.18 (0.09-0.26)    |
| Eswatini          | Osteoarthritis hip   | 1222.95    | 401.82  | 2805.33    | 466.03  | 129.39 | 0.30 (0.09-0.51)    |
| Eswatini          | Osteoarthritis hand  | 6450.40    | 2045.62 | 12635.57   | 2064.91 | 95.89  | 0.04 (0.04-0.04)    |
| Eswatini          | Osteoarthritis other | 2161.24    | 748.95  | 4512.16    | 792.98  | 108.78 | 0.13 (0.05-0.20)    |
| Ethiopia          | Osteoarthritis       | 1107784.82 | 5353.88 | 2413016.20 | 5554.20 | 117.82 | 0.14 (0.13-0.16)    |
| Ethiopia          | Osteoarthritis knee  | 669791.91  | 3230.74 | 1474693.75 | 3409.43 | 120.17 | 0.21 (0.19-0.23)    |
| Ethiopia          | Osteoarthritis hip   | 58948.21   | 288.12  | 140118.90  | 322.77  | 137.70 | 0.42 (0.38-0.45)    |

|          |                      |            |         |            |         |        |                     |
|----------|----------------------|------------|---------|------------|---------|--------|---------------------|
| Ethiopia | Osteoarthritis hand  | 351601.47  | 1719.13 | 743746.15  | 1717.02 | 111.53 | 0.01 (-0.01-0.03)   |
| Ethiopia | Osteoarthritis other | 129837.52  | 685.97  | 288842.88  | 716.04  | 122.46 | 0.14 (0.13-0.15)    |
| Fiji     | Osteoarthritis       | 19382.84   | 4903.91 | 43930.96   | 5464.89 | 126.65 | 0.32 (0.27-0.37)    |
| Fiji     | Osteoarthritis knee  | 16022.42   | 3991.18 | 36871.62   | 4537.63 | 130.13 | 0.39 (0.34-0.45)    |
| Fiji     | Osteoarthritis hip   | 1078.40    | 285.33  | 2669.50    | 346.15  | 147.54 | 0.52 (0.40-0.64)    |
| Fiji     | Osteoarthritis hand  | 1016.62    | 285.64  | 2138.52    | 290.04  | 110.36 | 0.04 (0.03-0.05)    |
| Fiji     | Osteoarthritis other | 2646.73    | 748.83  | 6010.18    | 801.11  | 127.08 | 0.18 (0.14-0.22)    |
| Finland  | Osteoarthritis       | 446656.26  | 6479.90 | 719739.54  | 6704.55 | 61.14  | 0.11 (0.09-0.13)    |
| Finland  | Osteoarthritis knee  | 279043.42  | 4019.33 | 462789.78  | 4255.83 | 65.85  | 0.19 (0.16-0.21)    |
| Finland  | Osteoarthritis hip   | 44935.01   | 645.33  | 83180.19   | 748.56  | 85.11  | 0.51 (0.46-0.57)    |
| Finland  | Osteoarthritis hand  | 145875.02  | 2110.57 | 218735.65  | 1999.39 | 49.95  | -0.20 (-0.21--0.19) |
| Finland  | Osteoarthritis other | 47683.03   | 686.30  | 81979.81   | 732.81  | 71.93  | 0.25 (0.22-0.27)    |
| France   | Osteoarthritis       | 5280753.25 | 6755.66 | 8427601.52 | 7043.96 | 59.59  | 0.16 (0.13-0.19)    |
| France   | Osteoarthritis knee  | 3088774.02 | 3916.20 | 5047811.42 | 4173.96 | 63.42  | 0.22 (0.20-0.24)    |
| France   | Osteoarthritis hip   | 513677.04  | 644.95  | 923173.09  | 747.21  | 79.72  | 0.59 (0.33-0.86)    |
| France   | Osteoarthritis hand  | 1998214.97 | 2543.87 | 3050493.84 | 2516.51 | 52.66  | -0.02 (-0.02--0.01) |
| France   | Osteoarthritis other | 542861.55  | 678.15  | 903402.79  | 718.21  | 66.41  | 0.21 (0.18-0.23)    |
| Gabon    | Osteoarthritis       | 31986.02   | 5639.69 | 68480.28   | 6108.84 | 114.09 | 0.26 (0.24-0.28)    |
| Gabon    | Osteoarthritis knee  | 20202.01   | 3548.09 | 44403.25   | 3973.19 | 119.80 | 0.37 (0.35-0.39)    |
| Gabon    | Osteoarthritis hip   | 1847.19    | 327.77  | 4679.53    | 429.13  | 153.33 | 0.89 (0.81-0.96)    |
| Gabon    | Osteoarthritis hand  | 9492.16    | 1687.10 | 18588.57   | 1667.84 | 95.83  | -0.05 (-0.05--0.05) |
| Gabon    | Osteoarthritis other | 3788.50    | 694.90  | 8055.88    | 766.35  | 112.64 | 0.32 (0.29-0.35)    |
| Gambia   | Osteoarthritis       | 20563.59   | 5549.28 | 58816.94   | 5895.66 | 186.02 | 0.20 (0.19-0.22)    |
| Gambia   | Osteoarthritis knee  | 13186.49   | 3563.66 | 38545.82   | 3879.57 | 192.31 | 0.28 (0.26-0.31)    |

|           |                      |            |         |             |         |        |                     |
|-----------|----------------------|------------|---------|-------------|---------|--------|---------------------|
| Gambia    | Osteoarthritis hip   | 984.43     | 266.92  | 3090.64     | 311.12  | 213.95 | 0.50 (0.45-0.54)    |
| Gambia    | Osteoarthritis hand  | 5976.36    | 1623.26 | 16413.92    | 1650.25 | 174.65 | 0.07 (0.06-0.08)    |
| Gambia    | Osteoarthritis other | 2354.45    | 686.10  | 6787.90     | 721.86  | 188.30 | 0.14 (0.13-0.16)    |
| Georgia   | Osteoarthritis       | 359738.00  | 5786.51 | 338499.86   | 5845.65 | -5.90  | -0.01 (-0.10-0.07)  |
| Georgia   | Osteoarthritis knee  | 176439.69  | 2833.85 | 169405.33   | 2925.66 | -3.99  | 0.10 (0.09-0.11)    |
| Georgia   | Osteoarthritis hip   | 24577.02   | 397.31  | 24253.75    | 416.24  | -1.32  | 0.14 (0.12-0.16)    |
| Georgia   | Osteoarthritis hand  | 156763.82  | 2526.34 | 144862.70   | 2477.34 | -7.59  | -0.19 (-0.45-0.08)  |
| Georgia   | Osteoarthritis other | 45574.30   | 742.69  | 44681.66    | 751.88  | -1.96  | 0.02 (0.01-0.03)    |
| Germany   | Osteoarthritis       | 7614034.22 | 6273.27 | 10975006.42 | 6506.41 | 44.14  | 0.11 (0.09-0.12)    |
| Germany   | Osteoarthritis knee  | 4935554.08 | 4043.03 | 7255223.72  | 4265.06 | 47.00  | 0.15 (0.14-0.17)    |
| Germany   | Osteoarthritis hip   | 786143.89  | 641.99  | 1287620.27  | 743.74  | 63.79  | 0.47 (0.42-0.52)    |
| Germany   | Osteoarthritis hand  | 2200278.31 | 1796.66 | 2941028.48  | 1708.57 | 33.67  | -0.18 (-0.19--0.17) |
| Germany   | Osteoarthritis other | 846470.56  | 688.25  | 1290678.31  | 734.80  | 52.48  | 0.21 (0.18-0.23)    |
| Ghana     | Osteoarthritis       | 371033.20  | 5593.78 | 1042822.73  | 6055.93 | 181.06 | 0.26 (0.25-0.28)    |
| Ghana     | Osteoarthritis knee  | 238246.28  | 3591.52 | 689220.24   | 4012.54 | 189.29 | 0.37 (0.34-0.39)    |
| Ghana     | Osteoarthritis hip   | 17279.56   | 265.23  | 55751.57    | 329.98  | 222.64 | 0.71 (0.65-0.78)    |
| Ghana     | Osteoarthritis hand  | 109279.09  | 1656.54 | 288219.97   | 1685.30 | 163.75 | 0.07 (0.06-0.08)    |
| Ghana     | Osteoarthritis other | 41367.47   | 677.87  | 117042.44   | 733.24  | 182.93 | 0.24 (0.22-0.26)    |
| Greece    | Osteoarthritis       | 838132.60  | 5637.24 | 1229564.78  | 5949.75 | 46.70  | 0.36 (0.28-0.44)    |
| Greece    | Osteoarthritis knee  | 594735.42  | 3979.69 | 881839.62   | 4247.65 | 48.27  | 0.21 (0.16-0.25)    |
| Greece    | Osteoarthritis hip   | 85836.27   | 574.71  | 140121.13   | 659.04  | 63.24  | 1.39 (0.99-1.78)    |
| Greece    | Osteoarthritis hand  | 160895.71  | 1076.18 | 227605.48   | 1072.13 | 41.46  | 0.84 (0.49-1.20)    |
| Greece    | Osteoarthritis other | 102572.53  | 688.02  | 157761.97   | 727.84  | 53.81  | 0.18 (0.14-0.23)    |
| Greenland | Osteoarthritis       | 2712.17    | 7242.04 | 5537.09     | 7548.20 | 104.16 | 0.15 (0.14-0.15)    |

|           |                      |           |         |           |         |        |                     |
|-----------|----------------------|-----------|---------|-----------|---------|--------|---------------------|
| Greenland | Osteoarthritis knee  | 965.85    | 2627.92 | 2111.97   | 2923.44 | 118.67 | 0.38 (0.34-0.41)    |
| Greenland | Osteoarthritis hip   | 169.47    | 476.27  | 424.85    | 600.81  | 150.70 | 0.82 (0.74-0.89)    |
| Greenland | Osteoarthritis hand  | 1694.93   | 4594.80 | 3354.98   | 4520.03 | 97.94  | -0.06 (-0.08--0.04) |
| Greenland | Osteoarthritis other | 234.78    | 663.96  | 495.84    | 712.30  | 111.19 | 0.25 (0.23-0.27)    |
| Grenada   | Osteoarthritis       | 3596.18   | 5316.94 | 6598.20   | 5679.63 | 83.48  | 0.22 (0.20-0.25)    |
| Grenada   | Osteoarthritis knee  | 2776.05   | 4110.90 | 5206.33   | 4470.87 | 87.54  | 0.28 (0.25-0.32)    |
| Grenada   | Osteoarthritis hip   | 180.38    | 259.51  | 356.86    | 313.39  | 97.84  | 0.62 (0.57-0.68)    |
| Grenada   | Osteoarthritis hand  | 547.05    | 792.36  | 878.19    | 771.55  | 60.53  | -0.08 (-0.10--0.05) |
| Grenada   | Osteoarthritis other | 489.75    | 695.71  | 837.50    | 738.75  | 71.01  | 0.19 (0.17-0.22)    |
| Guam      | Osteoarthritis       | 4310.90   | 5149.41 | 11014.14  | 5667.00 | 155.49 | 0.35 (0.32-0.38)    |
| Guam      | Osteoarthritis knee  | 3567.18   | 4208.68 | 9196.71   | 4715.80 | 157.81 | 0.42 (0.39-0.45)    |
| Guam      | Osteoarthritis hip   | 265.35    | 326.43  | 737.42    | 386.55  | 177.91 | 0.59 (0.54-0.65)    |
| Guam      | Osteoarthritis hand  | 214.83    | 283.07  | 545.65    | 285.56  | 153.99 | 0.03 (0.02-0.04)    |
| Guam      | Osteoarthritis other | 598.01    | 783.26  | 1591.95   | 828.01  | 166.21 | 0.21 (0.19-0.23)    |
| Guatemala | Osteoarthritis       | 196931.24 | 5148.36 | 629562.06 | 5603.76 | 219.69 | 0.29 (0.27-0.31)    |
| Guatemala | Osteoarthritis knee  | 149707.88 | 3899.07 | 488958.41 | 4348.73 | 226.61 | 0.37 (0.35-0.40)    |
| Guatemala | Osteoarthritis hip   | 8109.89   | 214.23  | 28749.48  | 253.87  | 254.50 | 0.57 (0.53-0.61)    |
| Guatemala | Osteoarthritis hand  | 32190.28  | 860.61  | 97623.57  | 883.19  | 203.27 | 0.09 (0.09-0.10)    |
| Guatemala | Osteoarthritis other | 24305.68  | 677.60  | 78055.71  | 712.62  | 221.14 | 0.19 (0.16-0.21)    |
| Guinea    | Osteoarthritis       | 186079.46 | 5519.82 | 326560.64 | 5718.07 | 75.50  | 0.10 (0.09-0.11)    |
| Guinea    | Osteoarthritis knee  | 119257.64 | 3530.00 | 212121.85 | 3721.63 | 77.87  | 0.16 (0.14-0.17)    |
| Guinea    | Osteoarthritis hip   | 8622.92   | 257.00  | 16079.12  | 283.93  | 86.47  | 0.32 (0.31-0.34)    |
| Guinea    | Osteoarthritis hand  | 55106.53  | 1640.33 | 93395.85  | 1638.07 | 69.48  | -0.02 (-0.03--0.01) |
| Guinea    | Osteoarthritis other | 21632.96  | 669.51  | 37592.68  | 696.60  | 73.78  | 0.12 (0.11-0.14)    |



|               |                      |           |         |           |         |        |                   |
|---------------|----------------------|-----------|---------|-----------|---------|--------|-------------------|
| Guinea-Bissau | Osteoarthritis       | 23166.12  | 5537.89 | 44225.54  | 5748.32 | 90.91  | 0.11 (0.09-0.12)  |
| Guinea-Bissau | Osteoarthritis knee  | 14834.45  | 3542.24 | 28672.47  | 3739.78 | 93.28  | 0.16 (0.13-0.18)  |
| Guinea-Bissau | Osteoarthritis hip   | 1059.58   | 256.09  | 2126.54   | 279.90  | 100.70 | 0.25 (0.21-0.29)  |
| Guinea-Bissau | Osteoarthritis hand  | 6893.41   | 1656.69 | 12823.86  | 1677.40 | 86.03  | 0.04 (0.03-0.05)  |
| Guinea-Bissau | Osteoarthritis other | 2585.16   | 666.84  | 4785.39   | 684.15  | 85.11  | 0.06 (0.05-0.08)  |
| Guyana        | Osteoarthritis       | 20775.74  | 5329.54 | 37589.65  | 5720.33 | 80.93  | 0.24 (0.22-0.26)  |
| Guyana        | Osteoarthritis knee  | 16096.22  | 4122.99 | 29686.30  | 4508.99 | 84.43  | 0.31 (0.29-0.33)  |
| Guyana        | Osteoarthritis hip   | 1057.10   | 271.02  | 2036.44   | 317.92  | 92.64  | 0.54 (0.47-0.60)  |
| Guyana        | Osteoarthritis hand  | 2921.86   | 768.53  | 4965.00   | 774.67  | 69.93  | 0.02 (0.02-0.03)  |
| Guyana        | Osteoarthritis other | 2626.45   | 707.62  | 4650.77   | 739.73  | 77.07  | 0.15 (0.12-0.17)  |
| Haiti         | Osteoarthritis       | 166732.47 | 4986.64 | 383503.21 | 5228.86 | 130.01 | 0.19 (0.18-0.20)  |
| Haiti         | Osteoarthritis knee  | 127753.03 | 3804.97 | 297622.33 | 4048.19 | 132.97 | 0.24 (0.23-0.26)  |
| Haiti         | Osteoarthritis hip   | 7388.20   | 222.68  | 17833.03  | 245.95  | 141.37 | 0.41 (0.38-0.44)  |
| Haiti         | Osteoarthritis hand  | 24984.96  | 770.01  | 55086.28  | 771.87  | 120.48 | 0.01 (0.00-0.01)  |
| Haiti         | Osteoarthritis other | 20942.76  | 664.04  | 46772.96  | 681.03  | 123.34 | 0.12 (0.11-0.13)  |
| Honduras      | Osteoarthritis       | 110572.35 | 5231.47 | 354026.42 | 5656.89 | 220.18 | 0.28 (0.25-0.30)  |
| Honduras      | Osteoarthritis knee  | 84105.67  | 3973.00 | 275171.67 | 4389.87 | 227.17 | 0.36 (0.33-0.38)  |
| Honduras      | Osteoarthritis hip   | 4712.87   | 222.45  | 16481.28  | 264.56  | 249.71 | 0.62 (0.55-0.69)  |
| Honduras      | Osteoarthritis hand  | 17947.77  | 865.54  | 53546.47  | 873.00  | 198.35 | 0.02 (0.00-0.03)  |
| Honduras      | Osteoarthritis other | 13986.01  | 691.00  | 44133.55  | 734.05  | 215.56 | 0.22 (0.19-0.26)  |
| Hungary       | Osteoarthritis       | 721471.29 | 4994.43 | 933960.63 | 5205.19 | 29.45  | 0.13 (0.11-0.14)  |
| Hungary       | Osteoarthritis knee  | 476509.84 | 3289.31 | 623577.78 | 3473.45 | 30.86  | 0.17 (0.15-0.19)  |
| Hungary       | Osteoarthritis hip   | 61250.12  | 421.94  | 84679.90  | 465.18  | 38.25  | 0.30 (0.27-0.34)  |
| Hungary       | Osteoarthritis hand  | 146005.89 | 1010.28 | 183810.31 | 1009.24 | 25.89  | 0.00 (-0.01-0.00) |

|                            |                      |             |         |             |         |        |                     |
|----------------------------|----------------------|-------------|---------|-------------|---------|--------|---------------------|
| Hungary                    | Osteoarthritis other | 111250.44   | 767.48  | 146807.84   | 794.58  | 31.96  | 0.10 (0.09-0.12)    |
| Iceland                    | Osteoarthritis       | 25263.88    | 9345.45 | 48876.65    | 9481.46 | 93.46  | 0.05 (-0.42-0.53)   |
| Iceland                    | Osteoarthritis knee  | 11006.85    | 4011.71 | 22428.55    | 4302.57 | 103.77 | 0.24 (0.23-0.26)    |
| Iceland                    | Osteoarthritis hip   | 2289.06     | 825.81  | 4384.52     | 831.83  | 91.54  | -0.16 (-0.29--0.04) |
| Iceland                    | Osteoarthritis hand  | 15474.89    | 5731.78 | 29414.76    | 5655.58 | 90.08  | 0.01 (-1.01-1.04)   |
| Iceland                    | Osteoarthritis other | 1936.18     | 698.13  | 3979.48     | 748.40  | 105.53 | 0.24 (0.22-0.26)    |
| India                      | Osteoarthritis       | 23464916.68 | 4895.33 | 62358473.79 | 5312.80 | 165.75 | 0.30 (0.29-0.32)    |
| India                      | Osteoarthritis knee  | 17411471.98 | 3585.42 | 46852407.36 | 3968.67 | 169.09 | 0.36 (0.34-0.37)    |
| India                      | Osteoarthritis hip   | 1062078.20  | 217.43  | 3284410.65  | 277.52  | 209.24 | 1.06 (0.89-1.22)    |
| India                      | Osteoarthritis hand  | 3819704.20  | 846.11  | 9813851.49  | 863.41  | 156.93 | 0.08 (0.08-0.08)    |
| India                      | Osteoarthritis other | 3006479.45  | 692.37  | 8171765.04  | 727.78  | 171.81 | 0.18 (0.17-0.19)    |
| Indonesia                  | Osteoarthritis       | 3903007.82  | 3756.55 | 9657472.22  | 4113.42 | 147.44 | 0.33 (0.32-0.35)    |
| Indonesia                  | Osteoarthritis knee  | 3107890.62  | 2942.25 | 7782842.35  | 3268.94 | 150.42 | 0.38 (0.37-0.40)    |
| Indonesia                  | Osteoarthritis hip   | 221306.22   | 216.97  | 582423.78   | 256.62  | 163.18 | 0.62 (0.59-0.66)    |
| Indonesia                  | Osteoarthritis hand  | 138246.61   | 146.37  | 312123.53   | 147.09  | 125.77 | 0.02 (0.01-0.02)    |
| Indonesia                  | Osteoarthritis other | 663797.43   | 697.19  | 1596245.95  | 734.40  | 140.47 | 0.18 (0.16-0.20)    |
| Iran (Islamic Republic of) | Osteoarthritis       | 1427709.36  | 5224.14 | 4282092.02  | 5588.22 | 199.93 | 0.21 (0.18-0.24)    |
| Iran (Islamic Republic of) | Osteoarthritis knee  | 912141.63   | 3326.63 | 2799041.50  | 3660.61 | 206.86 | 0.29 (0.28-0.30)    |
| Iran (Islamic Republic of) | Osteoarthritis hip   | 65587.09    | 239.08  | 213103.66   | 277.65  | 224.92 | 0.35 (0.21-0.49)    |
| Iran (Islamic Republic of) | Osteoarthritis hand  | 383756.33   | 1432.43 | 1123392.68  | 1476.24 | 192.74 | 0.13 (-0.01-0.27)   |
| Iran (Islamic Republic of) | Osteoarthritis other | 199962.12   | 774.80  | 589696.86   | 803.26  | 194.90 | 0.10 (0.08-0.11)    |
| Iraq                       | Osteoarthritis       | 404713.80   | 5100.87 | 1308928.08  | 5321.47 | 223.42 | 0.15 (0.13-0.17)    |
| Iraq                       | Osteoarthritis knee  | 287845.63   | 3626.74 | 947647.81   | 3853.22 | 229.22 | 0.21 (0.19-0.23)    |
| Iraq                       | Osteoarthritis hip   | 20241.44    | 253.10  | 67224.99    | 275.56  | 232.12 | 0.31 (0.26-0.36)    |

|         |                      |             |         |             |         |        |                     |
|---------|----------------------|-------------|---------|-------------|---------|--------|---------------------|
| Iraq    | Osteoarthritis hand  | 73031.20    | 932.00  | 224426.44   | 932.20  | 207.30 | 0.00 (0.00-0.01)    |
| Iraq    | Osteoarthritis other | 60178.23    | 788.16  | 185776.80   | 802.30  | 208.71 | 0.08 (0.06-0.10)    |
| Ireland | Osteoarthritis       | 271384.87   | 6910.97 | 517698.53   | 7231.58 | 90.76  | 0.15 (0.13-0.16)    |
| Ireland | Osteoarthritis knee  | 157237.77   | 3959.78 | 305885.36   | 4245.14 | 94.54  | 0.22 (0.20-0.25)    |
| Ireland | Osteoarthritis hip   | 25264.54    | 632.74  | 53485.67    | 738.98  | 111.70 | 0.51 (0.47-0.56)    |
| Ireland | Osteoarthritis hand  | 105559.50   | 2691.25 | 192072.55   | 2675.27 | 81.96  | -0.02 (-0.03--0.02) |
| Ireland | Osteoarthritis other | 27137.88    | 685.31  | 52992.55    | 729.52  | 95.27  | 0.21 (0.19-0.23)    |
| Israel  | Osteoarthritis       | 359506.11   | 7677.76 | 873212.97   | 7993.22 | 142.89 | -0.07 (-0.18-0.03)  |
| Israel  | Osteoarthritis knee  | 186031.25   | 3926.61 | 466644.73   | 4229.97 | 150.84 | 0.22 (0.18-0.26)    |
| Israel  | Osteoarthritis hip   | 28335.79    | 594.33  | 77230.50    | 693.20  | 172.55 | 0.47 (0.40-0.55)    |
| Israel  | Osteoarthritis hand  | 176583.83   | 3780.13 | 412615.54   | 3770.64 | 133.67 | -0.54 (-0.79--0.29) |
| Israel  | Osteoarthritis other | 32014.44    | 678.70  | 80698.73    | 722.10  | 152.07 | 0.21 (0.17-0.25)    |
| Italy   | Osteoarthritis       | 5692275.40  | 6658.21 | 8552465.21  | 6841.20 | 50.25  | 0.14 (0.08-0.20)    |
| Italy   | Osteoarthritis knee  | 3452909.87  | 4002.24 | 5259252.38  | 4169.75 | 52.31  | 0.11 (0.09-0.13)    |
| Italy   | Osteoarthritis hip   | 535954.60   | 621.67  | 882515.77   | 689.02  | 64.66  | 0.48 (0.34-0.62)    |
| Italy   | Osteoarthritis hand  | 1987310.69  | 2315.40 | 2909937.56  | 2286.92 | 46.43  | 0.19 (-0.05-0.43)   |
| Italy   | Osteoarthritis other | 631309.63   | 727.71  | 998789.81   | 758.31  | 58.21  | 0.12 (0.10-0.14)    |
| Jamaica | Osteoarthritis       | 91957.16    | 5374.31 | 172582.41   | 5775.26 | 87.68  | 0.28 (0.26-0.30)    |
| Jamaica | Osteoarthritis knee  | 71240.78    | 4162.91 | 135830.64   | 4556.17 | 90.66  | 0.35 (0.32-0.37)    |
| Jamaica | Osteoarthritis hip   | 4806.18     | 275.43  | 9879.01     | 331.17  | 105.55 | 0.71 (0.65-0.77)    |
| Jamaica | Osteoarthritis hand  | 13321.81    | 773.55  | 23032.99    | 765.42  | 72.90  | -0.03 (-0.04--0.03) |
| Jamaica | Osteoarthritis other | 12412.14    | 713.56  | 22698.17    | 755.02  | 82.87  | 0.23 (0.20-0.26)    |
| Japan   | Osteoarthritis       | 13034429.80 | 7598.49 | 23055620.13 | 7983.87 | 76.88  | 0.46 (0.36-0.56)    |
| Japan   | Osteoarthritis knee  | 9285856.25  | 5402.11 | 16114265.61 | 5462.17 | 73.54  | 0.06 (0.03-0.09)    |

|            |                      |            |         |            |         |        |                     |
|------------|----------------------|------------|---------|------------|---------|--------|---------------------|
| Japan      | Osteoarthritis hip   | 708947.00  | 416.93  | 1369643.26 | 452.89  | 93.19  | 0.26 (0.15-0.36)    |
| Japan      | Osteoarthritis hand  | 4275056.55 | 2499.79 | 8697100.52 | 2935.09 | 103.44 | 1.67 (1.27-2.07)    |
| Japan      | Osteoarthritis other | 1156666.16 | 679.78  | 2228151.90 | 700.68  | 92.64  | 0.11 (0.10-0.13)    |
| Jordan     | Osteoarthritis       | 71880.71   | 4991.14 | 399350.64  | 5470.37 | 455.57 | 0.32 (0.30-0.34)    |
| Jordan     | Osteoarthritis knee  | 51019.37   | 3538.09 | 290792.14  | 3986.32 | 469.96 | 0.42 (0.39-0.44)    |
| Jordan     | Osteoarthritis hip   | 3434.11    | 240.28  | 22051.67   | 307.07  | 542.14 | 0.86 (0.81-0.90)    |
| Jordan     | Osteoarthritis hand  | 12943.85   | 916.98  | 64485.36   | 903.43  | 398.19 | -0.04 (-0.05--0.04) |
| Jordan     | Osteoarthritis other | 10358.76   | 773.01  | 57591.18   | 845.56  | 455.97 | 0.32 (0.29-0.36)    |
| Kazakhstan | Osteoarthritis       | 700331.69  | 5486.10 | 1018423.63 | 5692.11 | 45.42  | 0.10 (0.09-0.11)    |
| Kazakhstan | Osteoarthritis knee  | 365042.25  | 2859.31 | 546558.35  | 3053.63 | 49.72  | 0.19 (0.18-0.21)    |
| Kazakhstan | Osteoarthritis hip   | 51051.28   | 401.65  | 81098.96   | 459.07  | 58.86  | 0.38 (0.35-0.41)    |
| Kazakhstan | Osteoarthritis hand  | 267070.70  | 2109.14 | 367429.43  | 2073.60 | 37.58  | -0.05 (-0.05--0.05) |
| Kazakhstan | Osteoarthritis other | 93160.87   | 747.76  | 136113.86  | 783.84  | 46.11  | 0.09 (0.06-0.11)    |
| Kenya      | Osteoarthritis       | 469875.71  | 5514.36 | 1370004.76 | 5791.36 | 191.57 | 0.17 (0.16-0.18)    |
| Kenya      | Osteoarthritis knee  | 286123.04  | 3361.24 | 849010.67  | 3599.32 | 196.73 | 0.23 (0.22-0.25)    |
| Kenya      | Osteoarthritis hip   | 26826.33   | 315.01  | 85330.86   | 363.29  | 218.09 | 0.50 (0.44-0.56)    |
| Kenya      | Osteoarthritis hand  | 146969.06  | 1734.85 | 409327.59  | 1751.55 | 178.51 | 0.03 (0.02-0.04)    |
| Kenya      | Osteoarthritis other | 56405.43   | 706.91  | 161980.66  | 743.68  | 187.17 | 0.18 (0.15-0.20)    |
| Kiribati   | Osteoarthritis       | 1866.69    | 4852.52 | 3903.63    | 5250.81 | 109.12 | 0.24 (0.16-0.32)    |
| Kiribati   | Osteoarthritis knee  | 1548.51    | 3974.41 | 3297.30    | 4374.89 | 112.93 | 0.30 (0.21-0.39)    |
| Kiribati   | Osteoarthritis hip   | 99.40      | 265.28  | 212.25     | 300.35  | 113.54 | 0.29 (0.08-0.49)    |
| Kiribati   | Osteoarthritis hand  | 103.44     | 294.46  | 197.99     | 297.69  | 91.40  | 0.04 (0.04-0.05)    |
| Kiribati   | Osteoarthritis other | 252.64     | 718.18  | 502.15     | 748.20  | 98.77  | 0.11 (0.05-0.17)    |
| Kuwait     | Osteoarthritis       | 37097.29   | 5154.10 | 183771.97  | 5627.57 | 395.38 | 0.34 (0.32-0.36)    |

|                                  |                      |           |         |           |         |        |                     |
|----------------------------------|----------------------|-----------|---------|-----------|---------|--------|---------------------|
| Kuwait                           | Osteoarthritis knee  | 26455.37  | 3690.74 | 133747.84 | 4124.70 | 405.56 | 0.42 (0.40-0.44)    |
| Kuwait                           | Osteoarthritis hip   | 2144.30   | 286.66  | 11223.88  | 348.89  | 423.43 | 0.75 (0.71-0.79)    |
| Kuwait                           | Osteoarthritis hand  | 5801.95   | 840.45  | 27249.39  | 855.71  | 369.66 | 0.09 (0.05-0.13)    |
| Kuwait                           | Osteoarthritis other | 5497.74   | 844.79  | 26386.53  | 898.71  | 379.95 | 0.27 (0.24-0.30)    |
| Kyrgyzstan                       | Osteoarthritis       | 157794.17 | 5215.09 | 256666.90 | 5341.94 | 62.66  | 0.06 (0.04-0.07)    |
| Kyrgyzstan                       | Osteoarthritis knee  | 80464.14  | 2660.56 | 134072.48 | 2795.71 | 66.62  | 0.13 (0.11-0.15)    |
| Kyrgyzstan                       | Osteoarthritis hip   | 10305.32  | 339.43  | 17586.55  | 373.52  | 70.66  | 0.23 (0.19-0.27)    |
| Kyrgyzstan                       | Osteoarthritis hand  | 62905.81  | 2083.91 | 97211.46  | 2041.85 | 54.53  | -0.06 (-0.07--0.05) |
| Kyrgyzstan                       | Osteoarthritis other | 20993.51  | 700.54  | 33234.60  | 722.94  | 58.31  | 0.05 (0.02-0.07)    |
| Lao People's Democratic Republic | Osteoarthritis       | 78751.95  | 3677.32 | 187340.08 | 3986.08 | 137.89 | 0.30 (0.29-0.32)    |
| Lao People's Democratic Republic | Osteoarthritis knee  | 63631.00  | 2931.80 | 153059.92 | 3211.05 | 140.54 | 0.34 (0.32-0.36)    |
| Lao People's Democratic Republic | Osteoarthritis hip   | 4176.37   | 198.25  | 10440.55  | 229.32  | 149.99 | 0.55 (0.52-0.58)    |
| Lao People's Democratic Republic | Osteoarthritis hand  | 2376.95   | 121.89  | 5134.44   | 119.92  | 116.01 | -0.05 (-0.06--0.04) |
| Lao People's Democratic Republic | Osteoarthritis other | 13067.56  | 655.05  | 30042.42  | 694.27  | 129.90 | 0.21 (0.19-0.22)    |
| Latvia                           | Osteoarthritis       | 217518.32 | 6110.97 | 229341.91 | 6343.94 | 5.44   | 0.14 (0.13-0.15)    |
| Latvia                           | Osteoarthritis knee  | 122989.60 | 3445.53 | 133848.52 | 3682.10 | 8.83   | 0.24 (0.23-0.26)    |
| Latvia                           | Osteoarthritis hip   | 13941.65  | 392.41  | 16588.35  | 450.03  | 18.98  | 0.51 (0.48-0.54)    |
| Latvia                           | Osteoarthritis hand  | 82160.39  | 2305.13 | 83065.77  | 2270.80 | 1.10   | -0.05 (-0.05--0.04) |
| Latvia                           | Osteoarthritis other | 26433.38  | 739.69  | 29313.90  | 774.97  | 10.90  | 0.18 (0.17-0.19)    |
| Lebanon                          | Osteoarthritis       | 114223.90 | 4857.65 | 277812.31 | 5370.68 | 143.22 | 0.31 (0.26-0.36)    |
| Lebanon                          | Osteoarthritis knee  | 79686.69  | 3379.23 | 198438.97 | 3834.60 | 149.02 | 0.39 (0.33-0.45)    |
| Lebanon                          | Osteoarthritis hip   | 5268.57   | 227.34  | 14973.96  | 287.34  | 184.21 | 0.55 (0.19-0.91)    |
| Lebanon                          | Osteoarthritis hand  | 21617.39  | 928.69  | 49507.77  | 959.23  | 129.02 | 0.12 (0.10-0.13)    |
| Lebanon                          | Osteoarthritis other | 17535.97  | 772.51  | 43455.91  | 841.80  | 147.81 | 0.32 (0.31-0.33)    |

|            |                      |           |         |           |         |        |                     |
|------------|----------------------|-----------|---------|-----------|---------|--------|---------------------|
| Lesotho    | Osteoarthritis       | 59126.62  | 5872.16 | 82569.00  | 6254.44 | 39.65  | 0.22 (0.21-0.23)    |
| Lesotho    | Osteoarthritis knee  | 34964.92  | 3478.57 | 50195.10  | 3824.72 | 43.56  | 0.32 (0.31-0.34)    |
| Lesotho    | Osteoarthritis hip   | 3199.96   | 320.42  | 5061.91   | 387.24  | 58.19  | 0.64 (0.62-0.66)    |
| Lesotho    | Osteoarthritis hand  | 20625.07  | 2047.05 | 27299.86  | 2061.28 | 32.36  | 0.03 (0.03-0.04)    |
| Lesotho    | Osteoarthritis other | 6544.78   | 679.94  | 9026.88   | 728.55  | 37.92  | 0.23 (0.22-0.24)    |
| Liberia    | Osteoarthritis       | 63210.01  | 5619.94 | 135667.06 | 5991.61 | 114.63 | 0.27 (0.24-0.30)    |
| Liberia    | Osteoarthritis knee  | 41062.66  | 3639.58 | 89419.55  | 3980.11 | 117.76 | 0.38 (0.34-0.41)    |
| Liberia    | Osteoarthritis hip   | 3138.31   | 279.25  | 7357.97   | 334.70  | 134.46 | 0.79 (0.69-0.89)    |
| Liberia    | Osteoarthritis hand  | 18070.53  | 1615.07 | 36816.33  | 1629.01 | 103.74 | 0.03 (0.03-0.04)    |
| Liberia    | Osteoarthritis other | 7423.17   | 686.66  | 15162.11  | 735.77  | 104.25 | 0.29 (0.25-0.33)    |
| Libya      | Osteoarthritis       | 97850.57  | 5065.73 | 300298.00 | 5416.76 | 206.89 | 0.24 (0.22-0.25)    |
| Libya      | Osteoarthritis knee  | 69602.65  | 3603.97 | 217784.99 | 3937.96 | 212.90 | 0.31 (0.29-0.32)    |
| Libya      | Osteoarthritis hip   | 4971.42   | 256.61  | 16077.05  | 293.61  | 223.39 | 0.47 (0.44-0.51)    |
| Libya      | Osteoarthritis hand  | 17165.48  | 899.98  | 49908.72  | 917.14  | 190.75 | 0.08 (0.07-0.09)    |
| Libya      | Osteoarthritis other | 14771.81  | 796.40  | 43271.45  | 828.12  | 192.93 | 0.15 (0.13-0.17)    |
| Lithuania  | Osteoarthritis       | 237932.40 | 5281.08 | 292444.06 | 5537.10 | 22.91  | 0.23 (0.18-0.27)    |
| Lithuania  | Osteoarthritis knee  | 153667.78 | 3405.57 | 192382.66 | 3641.00 | 25.19  | 0.25 (0.23-0.28)    |
| Lithuania  | Osteoarthritis hip   | 17306.63  | 385.07  | 23325.25  | 436.88  | 34.78  | 0.49 (0.43-0.55)    |
| Lithuania  | Osteoarthritis hand  | 59467.09  | 1319.08 | 70625.86  | 1311.30 | 18.76  | 0.22 (0.07-0.37)    |
| Lithuania  | Osteoarthritis other | 33099.25  | 732.73  | 42067.34  | 765.26  | 27.09  | 0.17 (0.14-0.20)    |
| Luxembourg | Osteoarthritis       | 37032.74  | 6982.25 | 69121.27  | 7218.81 | 86.65  | 0.10 (0.09-0.12)    |
| Luxembourg | Osteoarthritis knee  | 21480.27  | 4018.88 | 40598.27  | 4228.55 | 89.00  | 0.15 (0.14-0.17)    |
| Luxembourg | Osteoarthritis hip   | 3441.68   | 642.40  | 7127.15   | 739.00  | 107.08 | 0.47 (0.43-0.50)    |
| Luxembourg | Osteoarthritis hand  | 14445.21  | 2718.22 | 25700.77  | 2669.78 | 77.92  | -0.06 (-0.06--0.06) |

|            |                      |           |         |            |         |        |                     |
|------------|----------------------|-----------|---------|------------|---------|--------|---------------------|
| Luxembourg | Osteoarthritis other | 3706.13   | 693.45  | 7228.12    | 741.31  | 95.03  | 0.23 (0.21-0.25)    |
| Madagascar | Osteoarthritis       | 278377.75 | 5270.21 | 650953.20  | 5432.62 | 133.84 | 0.11 (0.10-0.12)    |
| Madagascar | Osteoarthritis knee  | 170958.92 | 3236.67 | 403249.71  | 3382.48 | 135.88 | 0.16 (0.15-0.17)    |
| Madagascar | Osteoarthritis hip   | 14320.29  | 274.44  | 33885.57   | 293.64  | 136.63 | 0.26 (0.23-0.29)    |
| Madagascar | Osteoarthritis hand  | 86419.08  | 1635.24 | 198342.14  | 1653.35 | 129.51 | 0.04 (0.03-0.04)    |
| Madagascar | Osteoarthritis other | 32650.99  | 658.71  | 72363.40   | 671.83  | 121.63 | 0.07 (0.06-0.09)    |
| Malawi     | Osteoarthritis       | 215943.42 | 5382.06 | 430209.14  | 5657.72 | 99.22  | 0.20 (0.18-0.21)    |
| Malawi     | Osteoarthritis knee  | 133857.98 | 3336.99 | 270983.35  | 3579.02 | 102.44 | 0.27 (0.24-0.29)    |
| Malawi     | Osteoarthritis hip   | 11375.68  | 287.81  | 24737.03   | 327.53  | 117.46 | 0.52 (0.46-0.57)    |
| Malawi     | Osteoarthritis hand  | 66636.61  | 1664.21 | 127505.73  | 1683.64 | 91.34  | 0.05 (0.05-0.06)    |
| Malawi     | Osteoarthritis other | 24263.08  | 652.90  | 48879.21   | 688.60  | 101.46 | 0.21 (0.19-0.24)    |
| Malaysia   | Osteoarthritis       | 383175.99 | 3926.70 | 1226479.69 | 4377.56 | 220.08 | 0.39 (0.38-0.40)    |
| Malaysia   | Osteoarthritis knee  | 309588.56 | 3133.29 | 996525.32  | 3527.47 | 221.89 | 0.43 (0.42-0.43)    |
| Malaysia   | Osteoarthritis hip   | 22609.27  | 236.04  | 80465.92   | 292.46  | 255.90 | 0.79 (0.77-0.81)    |
| Malaysia   | Osteoarthritis hand  | 10769.27  | 118.40  | 30930.47   | 117.00  | 187.21 | -0.06 (-0.08--0.05) |
| Malaysia   | Osteoarthritis other | 63390.93  | 699.76  | 204042.38  | 762.58  | 221.88 | 0.31 (0.29-0.32)    |
| Maldives   | Osteoarthritis       | 3517.47   | 3595.69 | 14263.17   | 4134.85 | 305.49 | 0.57 (0.52-0.61)    |
| Maldives   | Osteoarthritis knee  | 2835.34   | 2829.71 | 11591.05   | 3314.37 | 308.81 | 0.64 (0.59-0.68)    |
| Maldives   | Osteoarthritis hip   | 190.52    | 205.79  | 902.47     | 266.33  | 373.70 | 1.03 (0.92-1.14)    |
| Maldives   | Osteoarthritis hand  | 94.01     | 105.76  | 351.74     | 112.06  | 274.17 | 0.23 (0.20-0.26)    |
| Maldives   | Osteoarthritis other | 587.06    | 671.03  | 2288.62    | 732.38  | 289.85 | 0.36 (0.31-0.41)    |
| Mali       | Osteoarthritis       | 233881.44 | 5441.19 | 513943.98  | 5666.91 | 119.75 | 0.14 (0.13-0.15)    |
| Mali       | Osteoarthritis knee  | 149082.82 | 3458.43 | 333496.08  | 3682.28 | 123.70 | 0.22 (0.21-0.23)    |
| Mali       | Osteoarthritis hip   | 10296.29  | 244.10  | 24785.33   | 278.63  | 140.72 | 0.48 (0.45-0.51)    |

|                  |                      |            |         |            |         |        |                     |
|------------------|----------------------|------------|---------|------------|---------|--------|---------------------|
| Mali             | Osteoarthritis hand  | 70352.78   | 1645.39 | 147343.90  | 1627.81 | 109.44 | -0.04 (-0.04--0.04) |
| Mali             | Osteoarthritis other | 26366.88   | 657.22  | 58072.93   | 688.62  | 120.25 | 0.15 (0.14-0.15)    |
| Malta            | Osteoarthritis       | 29411.24   | 6896.67 | 60305.63   | 7247.05 | 105.04 | 0.15 (0.12-0.19)    |
| Malta            | Osteoarthritis knee  | 16859.63   | 3939.83 | 36007.85   | 4254.57 | 113.57 | 0.23 (0.18-0.29)    |
| Malta            | Osteoarthritis hip   | 2633.30    | 616.88  | 6434.64    | 746.99  | 144.36 | 0.61 (0.50-0.72)    |
| Malta            | Osteoarthritis hand  | 11530.02   | 2711.19 | 22482.22   | 2677.86 | 94.99  | -0.05 (-0.05--0.04) |
| Malta            | Osteoarthritis other | 2883.44    | 680.69  | 6335.21    | 735.41  | 119.71 | 0.27 (0.22-0.31)    |
| Marshall Islands | Osteoarthritis       | 769.90     | 4585.36 | 1915.31    | 5010.05 | 148.78 | 0.26 (0.23-0.30)    |
| Marshall Islands | Osteoarthritis knee  | 630.91     | 3723.81 | 1605.53    | 4125.23 | 154.48 | 0.31 (0.27-0.35)    |
| Marshall Islands | Osteoarthritis hip   | 40.49      | 239.93  | 103.16     | 287.18  | 154.79 | 0.51 (0.39-0.62)    |
| Marshall Islands | Osteoarthritis hand  | 44.83      | 286.64  | 96.32      | 280.59  | 114.87 | -0.09 (-0.10--0.07) |
| Marshall Islands | Osteoarthritis other | 108.03     | 693.21  | 250.93     | 740.34  | 132.29 | 0.19 (0.15-0.24)    |
| Mauritania       | Osteoarthritis       | 59333.90   | 5819.50 | 133551.90  | 6137.23 | 125.09 | 0.15 (0.13-0.17)    |
| Mauritania       | Osteoarthritis knee  | 38722.70   | 3793.23 | 89084.84   | 4099.39 | 130.06 | 0.22 (0.19-0.26)    |
| Mauritania       | Osteoarthritis hip   | 3089.02    | 303.51  | 7663.92    | 357.35  | 148.10 | 0.49 (0.42-0.56)    |
| Mauritania       | Osteoarthritis hand  | 16820.86   | 1659.46 | 35583.86   | 1639.44 | 111.55 | -0.04 (-0.05--0.04) |
| Mauritania       | Osteoarthritis other | 6936.99    | 711.11  | 15706.70   | 759.28  | 126.42 | 0.18 (0.15-0.21)    |
| Mauritius        | Osteoarthritis       | 30012.95   | 3976.03 | 78764.70   | 4385.98 | 162.44 | 0.35 (0.33-0.36)    |
| Mauritius        | Osteoarthritis knee  | 24203.92   | 3180.97 | 64181.81   | 3559.29 | 165.17 | 0.40 (0.39-0.42)    |
| Mauritius        | Osteoarthritis hip   | 1796.22    | 238.00  | 5052.00    | 285.89  | 181.26 | 0.65 (0.63-0.68)    |
| Mauritius        | Osteoarthritis hand  | 874.53     | 123.83  | 2125.25    | 122.32  | 143.02 | -0.04 (-0.05--0.03) |
| Mauritius        | Osteoarthritis other | 5052.43    | 703.23  | 13166.09   | 742.77  | 160.59 | 0.18 (0.17-0.19)    |
| Mexico           | Osteoarthritis       | 2978167.55 | 6738.95 | 8904301.93 | 7383.45 | 198.99 | 0.37 (0.33-0.40)    |
| Mexico           | Osteoarthritis knee  | 1907450.35 | 4328.04 | 5622846.44 | 4675.29 | 194.78 | 0.27 (0.25-0.28)    |



|                                  |                      |           |         |            |         |        |                     |
|----------------------------------|----------------------|-----------|---------|------------|---------|--------|---------------------|
| Mexico                           | Osteoarthritis hip   | 128934.53 | 291.07  | 391929.40  | 328.84  | 203.98 | -0.05 (-0.22-0.11)  |
| Mexico                           | Osteoarthritis hand  | 990083.66 | 2263.89 | 3237995.60 | 2694.19 | 227.04 | 0.84 (0.67-1.02)    |
| Mexico                           | Osteoarthritis other | 330849.90 | 784.55  | 954644.59  | 811.27  | 188.54 | 0.13 (0.12-0.14)    |
| Micronesia (Federated States of) | Osteoarthritis       | 2323.63   | 4891.43 | 4095.52    | 5309.87 | 76.26  | 0.24 (0.16-0.31)    |
| Micronesia (Federated States of) | Osteoarthritis knee  | 1911.56   | 3990.78 | 3455.08    | 4415.50 | 80.75  | 0.30 (0.22-0.38)    |
| Micronesia (Federated States of) | Osteoarthritis hip   | 134.19    | 282.89  | 231.71     | 319.27  | 72.67  | 0.29 (0.10-0.47)    |
| Micronesia (Federated States of) | Osteoarthritis hand  | 127.02    | 285.76  | 200.77     | 289.89  | 58.06  | 0.05 (0.04-0.06)    |
| Micronesia (Federated States of) | Osteoarthritis other | 329.46    | 739.08  | 537.80     | 765.83  | 63.24  | 0.08 (0.02-0.14)    |
| Monaco                           | Osteoarthritis       | 4426.31   | 7150.57 | 6122.66    | 7398.12 | 38.32  | 0.10 (0.09-0.12)    |
| Monaco                           | Osteoarthritis knee  | 2628.89   | 4166.67 | 3689.08    | 4390.10 | 40.33  | 0.16 (0.14-0.17)    |
| Monaco                           | Osteoarthritis hip   | 453.65    | 705.93  | 684.99     | 798.16  | 50.99  | 0.39 (0.35-0.44)    |
| Monaco                           | Osteoarthritis hand  | 1688.01   | 2706.64 | 2244.85    | 2677.38 | 32.99  | -0.04 (-0.04--0.03) |
| Monaco                           | Osteoarthritis other | 461.97    | 710.11  | 653.04     | 750.61  | 41.36  | 0.18 (0.16-0.20)    |
| Mongolia                         | Osteoarthritis       | 53629.49  | 5114.48 | 134602.06  | 5339.50 | 150.99 | 0.09 (0.05-0.12)    |
| Mongolia                         | Osteoarthritis knee  | 27425.55  | 2610.72 | 70256.23   | 2790.75 | 156.17 | 0.09 (0.01-0.17)    |
| Mongolia                         | Osteoarthritis hip   | 3525.35   | 334.78  | 9133.67    | 373.29  | 159.09 | 0.38 (0.34-0.41)    |
| Mongolia                         | Osteoarthritis hand  | 20907.78  | 2012.57 | 50602.10   | 2045.15 | 142.03 | 0.06 (0.05-0.07)    |
| Mongolia                         | Osteoarthritis other | 7125.68   | 701.75  | 16964.86   | 722.02  | 138.08 | 0.08 (0.06-0.10)    |
| Montenegro                       | Osteoarthritis       | 31081.98  | 4912.45 | 48977.69   | 5075.99 | 57.58  | 0.11 (0.10-0.12)    |
| Montenegro                       | Osteoarthritis knee  | 20418.67  | 3221.90 | 32648.95   | 3374.03 | 59.90  | 0.16 (0.14-0.17)    |
| Montenegro                       | Osteoarthritis hip   | 2556.95   | 407.26  | 4226.70    | 436.56  | 65.30  | 0.27 (0.24-0.30)    |
| Montenegro                       | Osteoarthritis hand  | 6328.71   | 1006.31 | 9710.41    | 1003.66 | 53.43  | -0.01 (-0.01--0.01) |
| Montenegro                       | Osteoarthritis other | 4703.01   | 753.81  | 7485.15    | 770.53  | 59.16  | 0.07 (0.06-0.09)    |
| Morocco                          | Osteoarthritis       | 669130.91 | 4775.09 | 1713120.41 | 5209.07 | 156.02 | 0.29 (0.28-0.29)    |

|            |                      |           |         |            |         |        |                     |
|------------|----------------------|-----------|---------|------------|---------|--------|---------------------|
| Morocco    | Osteoarthritis knee  | 470749.92 | 3349.76 | 1236999.32 | 3756.19 | 162.77 | 0.38 (0.37-0.39)    |
| Morocco    | Osteoarthritis hip   | 29200.53  | 207.92  | 83773.72   | 259.15  | 186.89 | 0.73 (0.71-0.75)    |
| Morocco    | Osteoarthritis hand  | 128817.87 | 930.47  | 301707.52  | 927.09  | 134.21 | -0.03 (-0.04--0.02) |
| Morocco    | Osteoarthritis other | 96733.28  | 722.98  | 247335.68  | 784.03  | 155.69 | 0.28 (0.27-0.29)    |
| Mozambique | Osteoarthritis       | 337062.21 | 5317.55 | 646913.67  | 5569.85 | 91.93  | 0.17 (0.16-0.18)    |
| Mozambique | Osteoarthritis knee  | 207520.91 | 3275.95 | 404707.42  | 3498.26 | 95.02  | 0.24 (0.23-0.25)    |
| Mozambique | Osteoarthritis hip   | 17088.16  | 276.72  | 35349.92   | 310.44  | 106.87 | 0.45 (0.42-0.47)    |
| Mozambique | Osteoarthritis hand  | 105201.89 | 1661.86 | 195204.26  | 1686.87 | 85.55  | 0.05 (0.05-0.06)    |
| Mozambique | Osteoarthritis other | 38011.61  | 650.01  | 72394.03   | 675.42  | 90.45  | 0.15 (0.14-0.16)    |
| Myanmar    | Osteoarthritis       | 875827.36 | 3677.42 | 1967269.60 | 4020.35 | 124.62 | 0.35 (0.32-0.37)    |
| Myanmar    | Osteoarthritis knee  | 707373.32 | 2933.00 | 1613368.58 | 3263.26 | 128.08 | 0.41 (0.38-0.44)    |
| Myanmar    | Osteoarthritis hip   | 46259.74  | 196.97  | 107254.68  | 226.08  | 131.85 | 0.55 (0.50-0.60)    |
| Myanmar    | Osteoarthritis hand  | 26798.75  | 122.10  | 56953.02   | 125.01  | 112.52 | 0.08 (0.08-0.09)    |
| Myanmar    | Osteoarthritis other | 146112.34 | 654.76  | 313590.48  | 678.77  | 114.62 | 0.16 (0.14-0.18)    |
| Namibia    | Osteoarthritis       | 43161.19  | 5898.37 | 91016.97   | 6184.32 | 110.88 | 0.15 (0.13-0.17)    |
| Namibia    | Osteoarthritis knee  | 25589.23  | 3497.92 | 54699.44   | 3750.21 | 113.76 | 0.21 (0.19-0.24)    |
| Namibia    | Osteoarthritis hip   | 2410.72   | 329.50  | 5480.63    | 378.14  | 127.34 | 0.41 (0.36-0.47)    |
| Namibia    | Osteoarthritis hand  | 14873.46  | 2032.22 | 30396.29   | 2048.42 | 104.37 | 0.03 (0.03-0.03)    |
| Namibia    | Osteoarthritis other | 4908.46   | 698.39  | 10267.26   | 735.96  | 109.17 | 0.17 (0.15-0.19)    |
| Nauru      | Osteoarthritis       | 208.56    | 4917.82 | 268.12     | 5405.18 | 28.56  | 0.28 (0.26-0.30)    |
| Nauru      | Osteoarthritis knee  | 172.92    | 3995.98 | 227.58     | 4490.42 | 31.61  | 0.36 (0.33-0.39)    |
| Nauru      | Osteoarthritis hip   | 11.70     | 293.67  | 14.91      | 331.53  | 27.44  | 0.22 (0.13-0.31)    |
| Nauru      | Osteoarthritis hand  | 10.31     | 279.63  | 12.21      | 290.23  | 18.48  | 0.15 (0.11-0.19)    |
| Nauru      | Osteoarthritis other | 27.58     | 758.58  | 32.70      | 787.86  | 18.55  | 0.06 (0.03-0.09)    |

|             |                      |            |         |            |         |        |                     |
|-------------|----------------------|------------|---------|------------|---------|--------|---------------------|
| Nepal       | Osteoarthritis       | 454691.05  | 4591.74 | 1168518.78 | 5083.48 | 156.99 | 0.38 (0.35-0.40)    |
| Nepal       | Osteoarthritis knee  | 334317.27  | 3336.54 | 874525.88  | 3783.10 | 161.59 | 0.47 (0.43-0.50)    |
| Nepal       | Osteoarthritis hip   | 20524.01   | 203.97  | 64627.18   | 279.40  | 214.89 | 1.17 (1.10-1.25)    |
| Nepal       | Osteoarthritis hand  | 73689.48   | 780.57  | 178661.91  | 797.79  | 142.45 | 0.07 (0.06-0.08)    |
| Nepal       | Osteoarthritis other | 58939.79   | 650.08  | 149891.42  | 683.01  | 154.31 | 0.18 (0.17-0.19)    |
| Netherlands | Osteoarthritis       | 1264941.81 | 6586.94 | 2108340.95 | 6753.28 | 66.67  | 0.05 (0.01-0.10)    |
| Netherlands | Osteoarthritis knee  | 803138.08  | 4156.56 | 1381442.40 | 4380.78 | 72.01  | 0.17 (0.16-0.19)    |
| Netherlands | Osteoarthritis hip   | 135653.23  | 695.29  | 236235.59  | 740.52  | 74.15  | 0.20 (0.11-0.29)    |
| Netherlands | Osteoarthritis hand  | 388502.79  | 2018.62 | 598550.56  | 1898.47 | 54.07  | -0.36 (-0.59--0.14) |
| Netherlands | Osteoarthritis other | 132943.25  | 684.29  | 231800.52  | 722.18  | 74.36  | 0.20 (0.19-0.22)    |
| New Zealand | Osteoarthritis       | 295871.84  | 7793.64 | 600882.54  | 8273.59 | 103.09 | 0.20 (0.19-0.22)    |
| New Zealand | Osteoarthritis knee  | 164644.78  | 4302.74 | 348686.76  | 4760.13 | 111.78 | 0.34 (0.32-0.37)    |
| New Zealand | Osteoarthritis hip   | 22153.04   | 574.78  | 53796.03   | 726.72  | 142.84 | 0.81 (0.75-0.88)    |
| New Zealand | Osteoarthritis hand  | 136804.08  | 3603.86 | 262781.80  | 3582.48 | 92.09  | -0.03 (-0.03--0.02) |
| New Zealand | Osteoarthritis other | 28342.05   | 738.61  | 59779.10   | 794.70  | 110.92 | 0.26 (0.24-0.28)    |
| Nicaragua   | Osteoarthritis       | 83867.75   | 5322.57 | 266625.82  | 5754.70 | 217.91 | 0.26 (0.23-0.29)    |
| Nicaragua   | Osteoarthritis knee  | 63972.78   | 4057.17 | 208078.07  | 4487.09 | 225.26 | 0.34 (0.30-0.37)    |
| Nicaragua   | Osteoarthritis hip   | 3649.55    | 229.99  | 12567.84   | 273.35  | 244.37 | 0.56 (0.47-0.65)    |
| Nicaragua   | Osteoarthritis hand  | 13493.67   | 876.52  | 39969.42   | 882.99  | 196.21 | 0.02 (0.02-0.03)    |
| Nicaragua   | Osteoarthritis other | 10547.10   | 700.24  | 32768.71   | 738.85  | 210.69 | 0.18 (0.15-0.22)    |
| Niger       | Osteoarthritis       | 162233.92  | 5428.68 | 466402.47  | 5607.24 | 187.49 | 0.11 (0.10-0.12)    |
| Niger       | Osteoarthritis knee  | 103047.02  | 3451.02 | 301042.49  | 3618.50 | 192.14 | 0.16 (0.14-0.17)    |
| Niger       | Osteoarthritis hip   | 7201.19    | 246.19  | 21338.58   | 262.67  | 196.32 | 0.22 (0.19-0.25)    |
| Niger       | Osteoarthritis hand  | 48455.78   | 1629.25 | 136818.59  | 1651.19 | 182.36 | 0.05 (0.05-0.05)    |

|                          |                      |            |         |            |         |        |                     |
|--------------------------|----------------------|------------|---------|------------|---------|--------|---------------------|
| Niger                    | Osteoarthritis other | 18001.87   | 663.72  | 51290.50   | 672.85  | 184.92 | 0.04 (0.03-0.04)    |
| Nigeria                  | Osteoarthritis       | 2601668.02 | 5732.25 | 5638854.44 | 5972.45 | 116.74 | 0.14 (0.06-0.21)    |
| Nigeria                  | Osteoarthritis knee  | 1659267.51 | 3647.47 | 3664598.69 | 3892.13 | 120.86 | 0.24 (0.12-0.36)    |
| Nigeria                  | Osteoarthritis hip   | 132344.32  | 292.86  | 269080.33  | 289.61  | 103.32 | -0.32 (-0.54--0.10) |
| Nigeria                  | Osteoarthritis hand  | 767001.58  | 1713.15 | 1636078.46 | 1747.50 | 113.31 | 0.08 (0.05-0.10)    |
| Nigeria                  | Osteoarthritis other | 313689.10  | 730.29  | 642688.92  | 744.70  | 104.88 | -0.01 (-0.07-0.05)  |
| Niue                     | Osteoarthritis       | 108.57     | 5091.82 | 123.19     | 5642.34 | 13.47  | 0.34 (0.28-0.40)    |
| Niue                     | Osteoarthritis knee  | 88.61      | 4169.47 | 102.63     | 4690.40 | 15.83  | 0.39 (0.33-0.45)    |
| Niue                     | Osteoarthritis hip   | 6.48       | 301.87  | 8.09       | 374.84  | 24.86  | 0.68 (0.52-0.84)    |
| Niue                     | Osteoarthritis hand  | 6.44       | 293.79  | 6.29       | 290.00  | -2.32  | -0.04 (-0.05--0.03) |
| Niue                     | Osteoarthritis other | 16.75      | 768.61  | 18.20      | 832.18  | 8.68   | 0.27 (0.21-0.33)    |
| North Macedonia          | Osteoarthritis       | 91356.80   | 4776.80 | 161190.77  | 5014.78 | 76.44  | 0.16 (0.15-0.17)    |
| North Macedonia          | Osteoarthritis knee  | 59718.10   | 3110.92 | 107240.70  | 3320.57 | 79.58  | 0.22 (0.21-0.22)    |
| North Macedonia          | Osteoarthritis hip   | 7165.31    | 378.98  | 13722.77   | 427.72  | 91.52  | 0.40 (0.39-0.40)    |
| North Macedonia          | Osteoarthritis hand  | 18911.99   | 999.61  | 31985.42   | 999.65  | 69.13  | 0.00 (0.00-0.00)    |
| North Macedonia          | Osteoarthritis other | 13656.04   | 735.21  | 24278.66   | 762.43  | 77.79  | 0.12 (0.11-0.14)    |
| Northern Mariana Islands | Osteoarthritis       | 1081.13    | 5037.78 | 3325.78    | 5495.25 | 207.62 | 0.25 (0.17-0.32)    |
| Northern Mariana Islands | Osteoarthritis knee  | 891.27     | 4074.83 | 2810.75    | 4560.69 | 215.37 | 0.33 (0.25-0.40)    |
| Northern Mariana Islands | Osteoarthritis hip   | 67.72      | 332.22  | 200.16     | 361.62  | 195.59 | 0.14 (-0.03-0.32)   |
| Northern Mariana Islands | Osteoarthritis hand  | 48.34      | 268.39  | 153.53     | 282.43  | 217.59 | 0.17 (0.15-0.19)    |
| Northern Mariana Islands | Osteoarthritis other | 143.09     | 795.31  | 447.45     | 804.87  | 212.71 | 0.00 (-0.05-0.06)   |
| Norway                   | Osteoarthritis       | 475054.41  | 7738.08 | 699997.65  | 7974.13 | 47.35  | 0.17 (0.13-0.21)    |
| Norway                   | Osteoarthritis knee  | 244601.90  | 3899.86 | 369337.25  | 4155.51 | 51.00  | 0.22 (0.21-0.23)    |
| Norway                   | Osteoarthritis hip   | 40370.26   | 634.59  | 66277.04   | 739.20  | 64.17  | 0.55 (0.53-0.57)    |

|           |                      |            |         |            |         |        |                     |
|-----------|----------------------|------------|---------|------------|---------|--------|---------------------|
| Norway    | Osteoarthritis hand  | 239969.50  | 3891.52 | 336956.67  | 3809.05 | 40.42  | 0.11 (0.02-0.21)    |
| Norway    | Osteoarthritis other | 46012.81   | 717.56  | 69261.22   | 760.18  | 50.53  | 0.22 (0.21-0.23)    |
| Oman      | Osteoarthritis       | 34126.41   | 4679.04 | 117159.27  | 5361.94 | 243.31 | 0.48 (0.47-0.50)    |
| Oman      | Osteoarthritis knee  | 23979.81   | 3279.48 | 84672.73   | 3896.27 | 253.10 | 0.60 (0.59-0.62)    |
| Oman      | Osteoarthritis hip   | 1557.75    | 204.34  | 6896.64    | 300.72  | 342.73 | 1.39 (1.37-1.41)    |
| Oman      | Osteoarthritis hand  | 6295.44    | 900.93  | 17931.45   | 873.19  | 184.83 | -0.14 (-0.16--0.11) |
| Oman      | Osteoarthritis other | 4842.90    | 721.36  | 16635.90   | 846.45  | 243.51 | 0.62 (0.60-0.65)    |
| Pakistan  | Osteoarthritis       | 2484465.44 | 4274.86 | 5522716.84 | 4714.86 | 122.29 | 0.40 (0.36-0.43)    |
| Pakistan  | Osteoarthritis knee  | 1666551.60 | 2845.25 | 3824006.79 | 3232.71 | 129.46 | 0.52 (0.47-0.58)    |
| Pakistan  | Osteoarthritis hip   | 141155.79  | 237.58  | 371159.15  | 306.72  | 162.94 | 1.00 (0.94-1.06)    |
| Pakistan  | Osteoarthritis hand  | 469384.56  | 827.61  | 944190.26  | 847.03  | 101.15 | 0.08 (0.08-0.09)    |
| Pakistan  | Osteoarthritis other | 392742.41  | 707.78  | 806077.65  | 746.80  | 105.24 | 0.22 (0.19-0.24)    |
| Palau     | Osteoarthritis       | 514.15     | 5098.49 | 1329.40    | 5604.10 | 158.56 | 0.28 (0.22-0.34)    |
| Palau     | Osteoarthritis knee  | 421.83     | 4155.56 | 1117.07    | 4645.01 | 164.82 | 0.34 (0.28-0.41)    |
| Palau     | Osteoarthritis hip   | 31.56      | 314.38  | 84.29      | 379.14  | 167.06 | 0.49 (0.31-0.67)    |
| Palau     | Osteoarthritis hand  | 27.22      | 285.55  | 61.17      | 284.02  | 124.71 | 0.00 (-0.03-0.02)   |
| Palau     | Osteoarthritis other | 75.03      | 784.99  | 183.49     | 834.52  | 144.55 | 0.16 (0.10-0.23)    |
| Palestine | Osteoarthritis       | 43519.71   | 4962.20 | 133600.14  | 5191.08 | 206.99 | 0.12 (0.10-0.14)    |
| Palestine | Osteoarthritis knee  | 30737.02   | 3499.23 | 96179.31   | 3736.06 | 212.91 | 0.18 (0.15-0.21)    |
| Palestine | Osteoarthritis hip   | 1978.14    | 224.28  | 6491.39    | 254.48  | 228.16 | 0.32 (0.26-0.39)    |
| Palestine | Osteoarthritis hand  | 8367.45    | 961.52  | 23570.70   | 938.77  | 181.70 | -0.08 (-0.09--0.07) |
| Palestine | Osteoarthritis other | 6335.66    | 746.55  | 18817.83   | 779.16  | 197.01 | 0.12 (0.10-0.13)    |
| Panama    | Osteoarthritis       | 77973.03   | 5149.18 | 238976.86  | 5732.93 | 206.49 | 0.33 (0.31-0.35)    |
| Panama    | Osteoarthritis knee  | 59126.97   | 3902.37 | 185778.19  | 4461.30 | 214.20 | 0.42 (0.40-0.44)    |

|                  |                      |            |         |            |         |        |                     |
|------------------|----------------------|------------|---------|------------|---------|--------|---------------------|
| Panama           | Osteoarthritis hip   | 3276.04    | 215.11  | 11575.27   | 278.73  | 253.33 | 0.79 (0.75-0.83)    |
| Panama           | Osteoarthritis hand  | 12864.45   | 859.55  | 36122.25   | 866.57  | 180.79 | 0.03 (0.02-0.03)    |
| Panama           | Osteoarthritis other | 10048.61   | 679.73  | 31172.77   | 749.17  | 210.22 | 0.29 (0.27-0.31)    |
| Papua New Guinea | Osteoarthritis       | 88611.51   | 4467.86 | 249172.00  | 4717.49 | 181.20 | 0.15 (0.13-0.18)    |
| Papua New Guinea | Osteoarthritis knee  | 72859.88   | 3612.31 | 207985.85  | 3868.26 | 185.46 | 0.20 (0.17-0.23)    |
| Papua New Guinea | Osteoarthritis hip   | 4384.49    | 229.27  | 12472.32   | 250.29  | 184.46 | 0.19 (0.12-0.27)    |
| Papua New Guinea | Osteoarthritis hand  | 5072.43    | 281.52  | 13178.95   | 279.35  | 159.82 | -0.03 (-0.04--0.03) |
| Papua New Guinea | Osteoarthritis other | 12209.00   | 683.58  | 32422.38   | 697.04  | 165.56 | 0.05 (0.03-0.08)    |
| Paraguay         | Osteoarthritis       | 119558.41  | 5305.87 | 322152.91  | 5676.68 | 169.45 | 0.23 (0.22-0.24)    |
| Paraguay         | Osteoarthritis knee  | 92354.50   | 4097.65 | 253340.60  | 4465.87 | 174.31 | 0.30 (0.29-0.31)    |
| Paraguay         | Osteoarthritis hip   | 6031.63    | 267.08  | 17607.04   | 311.64  | 191.91 | 0.52 (0.50-0.55)    |
| Paraguay         | Osteoarthritis hand  | 17084.26   | 768.82  | 43102.64   | 767.74  | 152.29 | 0.00 (-0.01-0.00)   |
| Paraguay         | Osteoarthritis other | 15577.67   | 710.70  | 41249.98   | 742.15  | 164.80 | 0.16 (0.14-0.18)    |
| Peru             | Osteoarthritis       | 647311.40  | 5294.68 | 1886258.84 | 5829.77 | 191.40 | 0.37 (0.35-0.39)    |
| Peru             | Osteoarthritis knee  | 496409.94  | 4059.03 | 1481445.35 | 4584.46 | 198.43 | 0.43 (0.42-0.44)    |
| Peru             | Osteoarthritis hip   | 31402.64   | 257.89  | 104085.58  | 323.04  | 231.45 | 0.83 (0.80-0.86)    |
| Peru             | Osteoarthritis hand  | 98709.25   | 820.76  | 266069.60  | 825.12  | 169.55 | 0.21 (0.09-0.34)    |
| Peru             | Osteoarthritis other | 82447.22   | 698.52  | 240424.23  | 748.35  | 191.61 | 0.30 (0.27-0.32)    |
| Philippines      | Osteoarthritis       | 1098331.96 | 3516.75 | 3203976.51 | 3893.85 | 191.71 | 0.35 (0.33-0.37)    |
| Philippines      | Osteoarthritis knee  | 842457.34  | 2654.82 | 2512738.93 | 3017.47 | 198.26 | 0.45 (0.42-0.48)    |
| Philippines      | Osteoarthritis hip   | 69999.77   | 225.27  | 207566.13  | 257.38  | 196.52 | 0.45 (0.43-0.46)    |
| Philippines      | Osteoarthritis hand  | 42015.42   | 145.24  | 112796.89  | 148.59  | 168.47 | 0.10 (0.09-0.10)    |
| Philippines      | Osteoarthritis other | 205362.43  | 710.46  | 571304.07  | 738.30  | 178.19 | 0.12 (0.12-0.13)    |
| Poland           | Osteoarthritis       | 2141425.89 | 4934.59 | 3496584.13 | 5276.03 | 63.28  | 0.22 (0.22-0.22)    |

|                   |                      |            |         |            |         |        |                     |
|-------------------|----------------------|------------|---------|------------|---------|--------|---------------------|
| Poland            | Osteoarthritis knee  | 1375045.57 | 3159.55 | 2286824.59 | 3448.36 | 66.31  | 0.29 (0.28-0.29)    |
| Poland            | Osteoarthritis hip   | 176646.35  | 404.86  | 322124.52  | 481.67  | 82.36  | 0.60 (0.59-0.60)    |
| Poland            | Osteoarthritis hand  | 471341.81  | 1092.06 | 730167.83  | 1087.79 | 54.91  | -0.01 (-0.02--0.01) |
| Poland            | Osteoarthritis other | 333491.85  | 770.37  | 559171.97  | 822.61  | 67.67  | 0.23 (0.22-0.24)    |
| Portugal          | Osteoarthritis       | 961631.88  | 7065.79 | 1562069.31 | 7391.73 | 62.44  | 0.15 (0.13-0.17)    |
| Portugal          | Osteoarthritis knee  | 551118.89  | 4008.32 | 927273.62  | 4321.19 | 68.25  | 0.22 (0.19-0.25)    |
| Portugal          | Osteoarthritis hip   | 78903.47   | 574.17  | 148725.73  | 680.49  | 88.49  | 0.07 (-0.11-0.25)   |
| Portugal          | Osteoarthritis hand  | 404665.43  | 2966.98 | 625892.89  | 2933.97 | 54.67  | 0.14 (0.08-0.21)    |
| Portugal          | Osteoarthritis other | 91925.96   | 673.56  | 160402.51  | 723.17  | 74.49  | 0.21 (0.18-0.24)    |
| Puerto Rico       | Osteoarthritis       | 214626.33  | 5969.85 | 410943.34  | 6412.92 | 91.47  | 0.29 (0.26-0.31)    |
| Puerto Rico       | Osteoarthritis knee  | 169404.55  | 4704.61 | 329231.77  | 5134.33 | 94.35  | 0.34 (0.32-0.37)    |
| Puerto Rico       | Osteoarthritis hip   | 13330.84   | 368.91  | 28677.67   | 436.84  | 115.12 | 0.67 (0.61-0.73)    |
| Puerto Rico       | Osteoarthritis hand  | 27865.84   | 776.92  | 51849.42   | 782.51  | 86.07  | 0.02 (0.02-0.03)    |
| Puerto Rico       | Osteoarthritis other | 28663.52   | 796.76  | 56961.34   | 844.88  | 98.72  | 0.25 (0.22-0.28)    |
| Qatar             | Osteoarthritis       | 8503.50    | 5255.95 | 83741.80   | 5507.98 | 884.79 | 0.13 (0.10-0.17)    |
| Qatar             | Osteoarthritis knee  | 6058.84    | 3781.39 | 60686.30   | 4029.91 | 901.62 | 0.18 (0.14-0.22)    |
| Qatar             | Osteoarthritis hip   | 545.03     | 311.17  | 5696.96    | 371.02  | 945.25 | 0.54 (0.44-0.64)    |
| Qatar             | Osteoarthritis hand  | 1217.22    | 827.42  | 10682.07   | 733.97  | 777.58 | -0.44 (-0.45--0.43) |
| Qatar             | Osteoarthritis other | 1226.38    | 871.94  | 12404.43   | 946.17  | 911.46 | 0.28 (0.22-0.34)    |
| Republic of Korea | Osteoarthritis       | 2984297.13 | 9433.19 | 8433115.27 | 9330.39 | 182.58 | 0.22 (0.12-0.31)    |
| Republic of Korea | Osteoarthritis knee  | 1905987.45 | 6171.24 | 5626789.31 | 6211.13 | 195.22 | 0.21 (0.06-0.36)    |
| Republic of Korea | Osteoarthritis hip   | 133592.89  | 436.60  | 429218.27  | 479.44  | 221.29 | 0.31 (0.22-0.40)    |
| Republic of Korea | Osteoarthritis hand  | 1419251.84 | 4552.75 | 3863791.60 | 4254.26 | 172.24 | 0.41 (0.18-0.63)    |
| Republic of Korea | Osteoarthritis other | 190593.45  | 641.71  | 595936.60  | 663.20  | 212.67 | 0.12 (0.11-0.14)    |

|                       |                      |             |         |             |         |        |                     |
|-----------------------|----------------------|-------------|---------|-------------|---------|--------|---------------------|
| Republic of Moldova   | Osteoarthritis       | 261895.89   | 5882.12 | 357388.01   | 6259.53 | 36.46  | 0.24 (0.20-0.27)    |
| Republic of Moldova   | Osteoarthritis knee  | 146022.45   | 3271.75 | 207193.97   | 3618.23 | 41.89  | 0.38 (0.33-0.43)    |
| Republic of Moldova   | Osteoarthritis hip   | 15531.55    | 350.72  | 24858.24    | 433.70  | 60.05  | 0.82 (0.71-0.92)    |
| Republic of Moldova   | Osteoarthritis hand  | 100541.75   | 2265.73 | 128915.13   | 2251.81 | 28.22  | -0.02 (-0.02--0.02) |
| Republic of Moldova   | Osteoarthritis other | 30568.56    | 704.58  | 44004.42    | 763.70  | 43.95  | 0.30 (0.26-0.35)    |
| Romania               | Osteoarthritis       | 1350663.28  | 4793.49 | 1776855.73  | 5097.05 | 31.55  | 0.21 (0.21-0.22)    |
| Romania               | Osteoarthritis knee  | 884307.53   | 3125.58 | 1179888.57  | 3383.56 | 33.43  | 0.27 (0.26-0.28)    |
| Romania               | Osteoarthritis hip   | 106003.88   | 378.25  | 156306.79   | 443.03  | 47.45  | 0.55 (0.53-0.56)    |
| Romania               | Osteoarthritis hand  | 281701.62   | 1004.97 | 355362.37   | 1005.90 | 26.15  | 0.00 (0.00-0.00)    |
| Romania               | Osteoarthritis other | 205034.80   | 737.00  | 279416.87   | 779.32  | 36.28  | 0.21 (0.20-0.23)    |
| Russian Federation    | Osteoarthritis       | 16275467.71 | 9028.28 | 20356488.91 | 8863.93 | 25.07  | -0.46 (-0.61--0.30) |
| Russian Federation    | Osteoarthritis knee  | 6044144.38  | 3335.32 | 8417374.46  | 3622.80 | 39.26  | 0.30 (0.29-0.31)    |
| Russian Federation    | Osteoarthritis hip   | 687897.37   | 381.64  | 1060202.03  | 457.07  | 54.12  | 0.63 (0.62-0.65)    |
| Russian Federation    | Osteoarthritis hand  | 11230252.33 | 6234.69 | 13015466.03 | 5656.83 | 15.90  | -1.13 (-1.44--0.81) |
| Russian Federation    | Osteoarthritis other | 1345087.67  | 751.68  | 1883987.12  | 802.96  | 40.06  | 0.22 (0.21-0.23)    |
| Rwanda                | Osteoarthritis       | 159832.26   | 5399.47 | 360974.32   | 5631.74 | 125.85 | 0.16 (0.15-0.17)    |
| Rwanda                | Osteoarthritis knee  | 99020.99    | 3341.58 | 226914.90   | 3548.69 | 129.16 | 0.23 (0.22-0.24)    |
| Rwanda                | Osteoarthritis hip   | 8360.43     | 283.76  | 20072.13    | 317.96  | 140.08 | 0.43 (0.39-0.47)    |
| Rwanda                | Osteoarthritis hand  | 49632.08    | 1682.89 | 108456.54   | 1699.79 | 118.52 | 0.04 (0.02-0.05)    |
| Rwanda                | Osteoarthritis other | 18107.04    | 655.00  | 40299.49    | 679.30  | 122.56 | 0.14 (0.12-0.16)    |
| Saint Kitts and Nevis | Osteoarthritis       | 1937.40     | 5579.25 | 4219.38     | 5959.36 | 117.79 | 0.22 (0.20-0.24)    |
| Saint Kitts and Nevis | Osteoarthritis knee  | 1517.74     | 4347.57 | 3347.47     | 4716.62 | 120.56 | 0.27 (0.25-0.29)    |
| Saint Kitts and Nevis | Osteoarthritis hip   | 108.44      | 300.20  | 248.49      | 361.65  | 129.14 | 0.63 (0.59-0.68)    |
| Saint Kitts and Nevis | Osteoarthritis hand  | 274.83      | 786.92  | 529.16      | 768.83  | 92.54  | -0.10 (-0.10--0.09) |



|                                  |                      |         |         |          |         |        |                     |
|----------------------------------|----------------------|---------|---------|----------|---------|--------|---------------------|
| Saint Kitts and Nevis            | Osteoarthritis other | 263.79  | 738.67  | 535.78   | 788.39  | 103.11 | 0.24 (0.21-0.27)    |
| Saint Lucia                      | Osteoarthritis       | 4679.97 | 5417.83 | 12787.05 | 5818.13 | 173.23 | 0.23 (0.21-0.25)    |
| Saint Lucia                      | Osteoarthritis knee  | 3639.79 | 4202.31 | 10101.73 | 4593.58 | 177.54 | 0.29 (0.26-0.31)    |
| Saint Lucia                      | Osteoarthritis hip   | 242.36  | 276.50  | 730.27   | 336.95  | 201.31 | 0.63 (0.56-0.69)    |
| Saint Lucia                      | Osteoarthritis hand  | 674.88  | 788.44  | 1680.46  | 770.24  | 149.00 | -0.08 (-0.09--0.08) |
| Saint Lucia                      | Osteoarthritis other | 610.25  | 710.84  | 1651.57  | 760.29  | 170.64 | 0.21 (0.18-0.24)    |
| Saint Vincent and the Grenadines | Osteoarthritis       | 3729.65 | 5347.70 | 7893.69  | 5734.13 | 111.65 | 0.27 (0.25-0.29)    |
| Saint Vincent and the Grenadines | Osteoarthritis knee  | 2893.28 | 4138.07 | 6232.86  | 4518.39 | 115.43 | 0.34 (0.32-0.36)    |
| Saint Vincent and the Grenadines | Osteoarthritis hip   | 188.79  | 265.55  | 451.44   | 331.84  | 139.13 | 0.84 (0.79-0.89)    |
| Saint Vincent and the Grenadines | Osteoarthritis hand  | 545.99  | 785.87  | 1025.27  | 750.77  | 87.78  | -0.16 (-0.17--0.16) |
| Saint Vincent and the Grenadines | Osteoarthritis other | 491.74  | 703.89  | 1028.29  | 755.21  | 109.11 | 0.29 (0.26-0.32)    |
| Samoa                            | Osteoarthritis       | 4562.46 | 5106.78 | 8254.09  | 5384.35 | 80.91  | 0.13 (0.07-0.18)    |
| Samoa                            | Osteoarthritis knee  | 3758.58 | 4177.59 | 6891.68  | 4460.09 | 83.36  | 0.16 (0.10-0.22)    |
| Samoa                            | Osteoarthritis hip   | 275.91  | 313.14  | 503.59   | 340.49  | 82.52  | 0.12 (-0.03-0.26)   |
| Samoa                            | Osteoarthritis hand  | 243.52  | 286.90  | 412.44   | 284.88  | 69.36  | -0.03 (-0.03--0.02) |
| Samoa                            | Osteoarthritis other | 659.63  | 771.20  | 1155.53  | 793.41  | 75.18  | 0.07 (0.02-0.11)    |
| San Marino                       | Osteoarthritis       | 2233.42 | 7004.60 | 4194.83  | 7290.44 | 87.82  | 0.13 (0.12-0.15)    |
| San Marino                       | Osteoarthritis knee  | 1300.66 | 4038.04 | 2490.35  | 4289.86 | 91.47  | 0.20 (0.17-0.22)    |
| San Marino                       | Osteoarthritis hip   | 215.80  | 667.85  | 446.30   | 757.05  | 106.81 | 0.44 (0.38-0.50)    |
| San Marino                       | Osteoarthritis hand  | 859.67  | 2688.78 | 1553.33  | 2677.53 | 80.69  | -0.02 (-0.03--0.02) |
| San Marino                       | Osteoarthritis other | 225.83  | 701.09  | 443.92   | 739.72  | 96.57  | 0.19 (0.16-0.21)    |
| Sao Tome and Principe            | Osteoarthritis       | 3711.07 | 5709.02 | 6859.94  | 6027.59 | 84.85  | 0.18 (0.17-0.19)    |
| Sao Tome and Principe            | Osteoarthritis knee  | 2420.82 | 3703.72 | 4535.70  | 4001.27 | 87.36  | 0.26 (0.25-0.27)    |
| Sao Tome and Principe            | Osteoarthritis hip   | 182.57  | 282.37  | 370.79   | 333.96  | 103.09 | 0.56 (0.54-0.58)    |

|                       |                      |           |         |            |         |        |                     |
|-----------------------|----------------------|-----------|---------|------------|---------|--------|---------------------|
| Sao Tome and Principe | Osteoarthritis hand  | 1071.38   | 1661.09 | 1873.13    | 1652.79 | 74.83  | -0.02 (-0.02--0.01) |
| Sao Tome and Principe | Osteoarthritis other | 431.56    | 683.96  | 775.95     | 736.01  | 79.80  | 0.22 (0.20-0.24)    |
| Saudi Arabia          | Osteoarthritis       | 388330.24 | 6017.80 | 1500332.12 | 6601.32 | 286.35 | 0.10 (0.01-0.19)    |
| Saudi Arabia          | Osteoarthritis knee  | 220177.74 | 3462.45 | 889494.03  | 4020.53 | 303.99 | 0.49 (0.47-0.52)    |
| Saudi Arabia          | Osteoarthritis hip   | 15617.01  | 240.79  | 72901.86   | 330.15  | 366.81 | 1.06 (1.02-1.09)    |
| Saudi Arabia          | Osteoarthritis hand  | 144821.77 | 2244.55 | 507203.92  | 2226.26 | 250.23 | -0.70 (-0.96--0.43) |
| Saudi Arabia          | Osteoarthritis other | 46395.58  | 783.92  | 174287.31  | 883.70  | 275.65 | 0.45 (0.43-0.47)    |
| Senegal               | Osteoarthritis       | 189312.55 | 5671.87 | 463206.28  | 5884.55 | 144.68 | 0.10 (0.09-0.12)    |
| Senegal               | Osteoarthritis knee  | 122494.49 | 3667.88 | 304353.84  | 3869.86 | 148.46 | 0.15 (0.13-0.17)    |
| Senegal               | Osteoarthritis hip   | 9343.59   | 282.74  | 23853.76   | 307.78  | 155.30 | 0.23 (0.19-0.26)    |
| Senegal               | Osteoarthritis hand  | 54466.11  | 1638.24 | 129771.28  | 1654.84 | 138.26 | 0.04 (0.03-0.04)    |
| Senegal               | Osteoarthritis other | 21924.85  | 696.54  | 52986.27   | 714.65  | 141.67 | 0.06 (0.04-0.07)    |
| Serbia                | Osteoarthritis       | 564452.82 | 4840.12 | 767867.24  | 5108.33 | 36.04  | 0.20 (0.19-0.21)    |
| Serbia                | Osteoarthritis knee  | 370326.97 | 3165.03 | 511860.57  | 3393.21 | 38.22  | 0.25 (0.24-0.27)    |
| Serbia                | Osteoarthritis hip   | 45142.50  | 391.62  | 68374.23   | 448.15  | 51.46  | 0.51 (0.49-0.54)    |
| Serbia                | Osteoarthritis hand  | 116227.76 | 1003.15 | 151852.22  | 1001.82 | 30.65  | 0.00 (0.00-0.00)    |
| Serbia                | Osteoarthritis other | 84908.51  | 741.76  | 119719.31  | 781.01  | 41.00  | 0.19 (0.18-0.21)    |
| Seychelles            | Osteoarthritis       | 2270.75   | 4113.23 | 5191.31    | 4421.72 | 128.62 | 0.22 (0.21-0.23)    |
| Seychelles            | Osteoarthritis knee  | 1817.71   | 3298.81 | 4246.10    | 3584.99 | 133.60 | 0.26 (0.25-0.27)    |
| Seychelles            | Osteoarthritis hip   | 144.64    | 257.41  | 335.16     | 295.78  | 131.72 | 0.42 (0.38-0.46)    |
| Seychelles            | Osteoarthritis hand  | 69.10     | 124.42  | 132.14     | 120.73  | 91.23  |                     |
| Seychelles            | Osteoarthritis other | 401.47    | 721.07  | 841.38     | 751.16  | 109.58 | 0.11 (0.09-0.13)    |
| Sierra Leone          | Osteoarthritis       | 106588.45 | 5504.03 | 217182.16  | 5747.61 | 103.76 | 0.13 (0.12-0.14)    |
| Sierra Leone          | Osteoarthritis knee  | 68241.03  | 3522.45 | 141295.90  | 3751.17 | 107.05 | 0.19 (0.18-0.20)    |

|                 |                      |           |         |           |         |        |                     |
|-----------------|----------------------|-----------|---------|-----------|---------|--------|---------------------|
| Sierra Leone    | Osteoarthritis hip   | 4974.11   | 256.50  | 10828.99  | 289.45  | 117.71 | 0.37 (0.34-0.40)    |
| Sierra Leone    | Osteoarthritis hand  | 31511.05  | 1631.76 | 61728.08  | 1638.23 | 95.89  | 0.01 (0.00-0.02)    |
| Sierra Leone    | Osteoarthritis other | 12437.24  | 667.88  | 24730.65  | 701.68  | 98.84  | 0.15 (0.12-0.18)    |
| Singapore       | Osteoarthritis       | 197902.00 | 8445.63 | 696424.61 | 8564.60 | 251.90 | 0.11 (0.09-0.13)    |
| Singapore       | Osteoarthritis knee  | 129095.63 | 5611.18 | 473477.09 | 5850.36 | 266.76 | 0.14 (0.11-0.16)    |
| Singapore       | Osteoarthritis hip   | 9386.89   | 409.20  | 39500.23  | 491.96  | 320.80 | 0.62 (0.57-0.68)    |
| Singapore       | Osteoarthritis hand  | 82854.19  | 3580.45 | 274660.45 | 3383.04 | 231.50 | 0.10 (0.00-0.20)    |
| Singapore       | Osteoarthritis other | 14264.59  | 639.92  | 54882.94  | 687.36  | 284.75 | 0.27 (0.25-0.29)    |
| Slovakia        | Osteoarthritis       | 289630.50 | 4914.46 | 460482.63 | 5147.31 | 58.99  | 0.13 (0.11-0.14)    |
| Slovakia        | Osteoarthritis knee  | 190215.10 | 3221.11 | 306894.11 | 3424.57 | 61.34  | 0.17 (0.15-0.19)    |
| Slovakia        | Osteoarthritis hip   | 24008.97  | 404.68  | 40831.16  | 453.10  | 70.07  | 0.31 (0.27-0.34)    |
| Slovakia        | Osteoarthritis hand  | 59363.91  | 1008.37 | 90623.22  | 1007.48 | 52.66  | 0.00 (-0.01-0.00)   |
| Slovakia        | Osteoarthritis other | 44591.01  | 757.10  | 71336.58  | 788.05  | 59.98  | 0.10 (0.07-0.12)    |
| Slovenia        | Osteoarthritis       | 118930.08 | 4877.65 | 203788.93 | 5150.99 | 71.35  | 0.19 (0.17-0.20)    |
| Slovenia        | Osteoarthritis knee  | 78203.84  | 3202.39 | 135256.58 | 3424.42 | 72.95  | 0.22 (0.21-0.24)    |
| Slovenia        | Osteoarthritis hip   | 9569.08   | 392.92  | 18370.87  | 458.42  | 91.98  | 0.55 (0.50-0.59)    |
| Slovenia        | Osteoarthritis hand  | 24667.55  | 1012.35 | 40447.86  | 1002.90 | 63.97  | -0.03 (-0.04--0.03) |
| Slovenia        | Osteoarthritis other | 18086.80  | 742.75  | 32427.08  | 789.87  | 79.29  | 0.23 (0.21-0.25)    |
| Solomon Islands | Osteoarthritis       | 6592.03   | 4520.07 | 16732.21  | 4943.26 | 153.83 | 0.27 (0.20-0.34)    |
| Solomon Islands | Osteoarthritis knee  | 5418.49   | 3639.11 | 14023.03  | 4070.40 | 158.80 | 0.35 (0.28-0.43)    |
| Solomon Islands | Osteoarthritis hip   | 340.53    | 246.58  | 880.22    | 277.19  | 158.48 | 0.29 (0.12-0.46)    |
| Solomon Islands | Osteoarthritis hand  | 359.43    | 272.81  | 849.28    | 281.29  | 136.28 | 0.11 (0.11-0.11)    |
| Solomon Islands | Osteoarthritis other | 914.29    | 705.79  | 2161.35   | 728.03  | 136.40 | 0.07 (0.01-0.13)    |
| Somalia         | Osteoarthritis       | 146767.98 | 5324.35 | 387321.61 | 5474.13 | 163.90 | 0.11 (0.10-0.12)    |

|              |                      |            |         |            |         |        |                  |
|--------------|----------------------|------------|---------|------------|---------|--------|------------------|
| Somalia      | Osteoarthritis knee  | 89704.38   | 3278.41 | 239687.92  | 3407.86 | 167.20 | 0.15 (0.14-0.16) |
| Somalia      | Osteoarthritis hip   | 7346.63    | 276.34  | 20044.51   | 287.95  | 172.84 | 0.20 (0.18-0.22) |
| Somalia      | Osteoarthritis hand  | 46015.47   | 1665.12 | 119706.80  | 1700.40 | 160.14 | 0.08 (0.07-0.09) |
| Somalia      | Osteoarthritis other | 15910.66   | 651.32  | 42093.29   | 659.49  | 164.56 | 0.06 (0.05-0.07) |
| South Africa | Osteoarthritis       | 1352471.42 | 6348.61 | 3086043.50 | 6632.56 | 128.18 | 0.16 (0.15-0.17) |
| South Africa | Osteoarthritis knee  | 805942.20  | 3801.03 | 1885916.36 | 4064.00 | 134.00 | 0.24 (0.23-0.25) |
| South Africa | Osteoarthritis hip   | 88659.88   | 416.70  | 219022.04  | 473.90  | 147.04 | 0.49 (0.45-0.53) |
| South Africa | Osteoarthritis hand  | 453491.62  | 2128.57 | 988547.21  | 2132.13 | 117.99 | 0.01 (0.00-0.01) |
| South Africa | Osteoarthritis other | 162312.81  | 793.52  | 371226.29  | 830.00  | 128.71 | 0.17 (0.15-0.19) |
| South Sudan  | Osteoarthritis       | 129302.22  | 5287.56 | 232954.99  | 5506.09 | 80.16  | 0.15 (0.14-0.15) |
| South Sudan  | Osteoarthritis knee  | 79970.27   | 3275.28 | 146048.51  | 3472.62 | 82.63  | 0.21 (0.20-0.22) |
| South Sudan  | Osteoarthritis hip   | 7002.90    | 287.89  | 12818.79   | 316.21  | 83.05  | 0.36 (0.34-0.38) |
| South Sudan  | Osteoarthritis hand  | 39082.89   | 1600.39 | 68913.14   | 1620.45 | 76.33  | 0.04 (0.04-0.05) |
| South Sudan  | Osteoarthritis other | 15323.31   | 664.33  | 26016.84   | 676.90  | 69.79  | 0.08 (0.07-0.09) |
| Spain        | Osteoarthritis       | 3599307.44 | 6845.06 | 6594480.97 | 7686.61 | 83.22  | 0.63 (0.53-0.73) |
| Spain        | Osteoarthritis knee  | 2118596.19 | 3989.06 | 3664703.59 | 4231.91 | 72.98  | 0.17 (0.14-0.19) |
| Spain        | Osteoarthritis hip   | 360466.48  | 676.58  | 682455.59  | 777.81  | 89.33  | 0.37 (0.23-0.51) |
| Spain        | Osteoarthritis hand  | 1353854.43 | 2562.52 | 2934386.27 | 3380.22 | 116.74 | 1.88 (1.47-2.30) |
| Spain        | Osteoarthritis other | 369979.86  | 696.97  | 658256.64  | 735.39  | 77.92  | 0.15 (0.12-0.19) |
| Sri Lanka    | Osteoarthritis       | 427205.41  | 3752.48 | 1075077.85 | 4117.82 | 151.65 | 0.34 (0.33-0.35) |
| Sri Lanka    | Osteoarthritis knee  | 344151.14  | 2984.44 | 874391.77  | 3334.66 | 154.07 | 0.41 (0.39-0.42) |
| Sri Lanka    | Osteoarthritis hip   | 23897.09   | 213.79  | 62355.04   | 241.42  | 160.93 | 0.45 (0.43-0.47) |
| Sri Lanka    | Osteoarthritis hand  | 12406.76   | 116.85  | 31049.78   | 123.54  | 150.27 | 0.20 (0.19-0.22) |
| Sri Lanka    | Osteoarthritis other | 71915.07   | 677.23  | 180621.07  | 704.15  | 151.16 | 0.15 (0.14-0.16) |

|                      |                      |           |         |            |         |        |                     |
|----------------------|----------------------|-----------|---------|------------|---------|--------|---------------------|
| Sudan                | Osteoarthritis       | 427067.09 | 4518.00 | 1005517.30 | 5081.94 | 135.45 | 0.40 (0.37-0.43)    |
| Sudan                | Osteoarthritis knee  | 297295.36 | 3134.28 | 722690.62  | 3653.40 | 143.09 | 0.52 (0.49-0.56)    |
| Sudan                | Osteoarthritis hip   | 17241.11  | 180.86  | 49246.53   | 248.97  | 185.63 | 1.11 (1.03-1.20)    |
| Sudan                | Osteoarthritis hand  | 84754.16  | 907.33  | 174430.18  | 893.00  | 105.81 | -0.07 (-0.08--0.06) |
| Sudan                | Osteoarthritis other | 61811.15  | 685.51  | 144414.19  | 776.77  | 133.64 | 0.44 (0.41-0.47)    |
| Suriname             | Osteoarthritis       | 14472.88  | 5436.88 | 36636.83   | 5903.35 | 153.14 | 0.29 (0.28-0.31)    |
| Suriname             | Osteoarthritis knee  | 11218.54  | 4214.53 | 29013.06   | 4672.16 | 158.62 | 0.37 (0.35-0.38)    |
| Suriname             | Osteoarthritis hip   | 755.68    | 287.16  | 2117.03    | 347.42  | 180.15 | 0.69 (0.67-0.72)    |
| Suriname             | Osteoarthritis hand  | 2023.07   | 768.95  | 4763.19    | 776.94  | 135.44 | 0.04 (0.04-0.04)    |
| Suriname             | Osteoarthritis other | 1888.61   | 728.12  | 4675.01    | 768.94  | 147.54 | 0.22 (0.20-0.24)    |
| Sweden               | Osteoarthritis       | 722504.51 | 5231.68 | 1048054.83 | 5679.87 | 45.06  | 0.24 (0.18-0.31)    |
| Sweden               | Osteoarthritis knee  | 435332.24 | 3117.46 | 634211.22  | 3413.39 | 45.68  | 0.21 (0.10-0.32)    |
| Sweden               | Osteoarthritis hip   | 66815.33  | 480.95  | 135053.83  | 718.97  | 102.13 | 1.56 (1.19-1.93)    |
| Sweden               | Osteoarthritis hand  | 209631.27 | 1506.67 | 279638.39  | 1487.39 | 33.40  | -0.26 (-0.67-0.15)  |
| Sweden               | Osteoarthritis other | 102652.12 | 723.27  | 146800.53  | 764.59  | 43.01  | 0.19 (0.17-0.20)    |
| Switzerland          | Osteoarthritis       | 673677.22 | 6891.86 | 1108960.61 | 7064.57 | 64.61  | 0.08 (0.08-0.09)    |
| Switzerland          | Osteoarthritis knee  | 389024.13 | 3940.61 | 650651.28  | 4108.06 | 67.25  | 0.14 (0.13-0.14)    |
| Switzerland          | Osteoarthritis hip   | 61470.04  | 617.00  | 109107.24  | 678.78  | 77.50  | 0.34 (0.32-0.35)    |
| Switzerland          | Osteoarthritis hand  | 265271.07 | 2709.90 | 423666.04  | 2676.35 | 59.71  | -0.05 (-0.05--0.04) |
| Switzerland          | Osteoarthritis other | 68363.47  | 682.26  | 115368.07  | 706.68  | 68.76  | 0.14 (0.13-0.15)    |
| Syrian Arab Republic | Osteoarthritis       | 266253.71 | 4894.53 | 698432.87  | 5218.67 | 162.32 | 0.18 (0.16-0.21)    |
| Syrian Arab Republic | Osteoarthritis knee  | 188539.58 | 3462.71 | 505410.09  | 3768.26 | 168.07 | 0.24 (0.21-0.28)    |
| Syrian Arab Republic | Osteoarthritis hip   | 12419.44  | 228.86  | 34270.22   | 264.98  | 175.94 | 0.38 (0.30-0.46)    |
| Syrian Arab Republic | Osteoarthritis hand  | 48907.39  | 906.22  | 120885.12  | 909.17  | 147.17 | 0.01 (-0.01-0.03)   |

|                            |                      |            |         |            |         |        |                     |
|----------------------------|----------------------|------------|---------|------------|---------|--------|---------------------|
| Syrian Arab Republic       | Osteoarthritis other | 39010.60   | 753.41  | 100441.84  | 792.81  | 157.47 | 0.14 (0.10-0.18)    |
| Taiwan (Province of China) | Osteoarthritis       | 960051.51  | 5818.76 | 2535730.56 | 6452.51 | 164.12 | 0.42 (0.39-0.45)    |
| Taiwan (Province of China) | Osteoarthritis knee  | 765585.04  | 4607.87 | 2090238.73 | 5321.82 | 173.03 | 0.57 (0.53-0.61)    |
| Taiwan (Province of China) | Osteoarthritis hip   | 34632.97   | 211.18  | 96075.48   | 245.45  | 177.41 | 0.67 (0.59-0.75)    |
| Taiwan (Province of China) | Osteoarthritis hand  | 139126.74  | 866.76  | 344721.14  | 865.28  | 147.77 | -0.01 (-0.01--0.01) |
| Taiwan (Province of China) | Osteoarthritis other | 112694.75  | 718.75  | 296726.30  | 743.14  | 163.30 | 0.21 (0.17-0.25)    |
| Tajikistan                 | Osteoarthritis       | 141354.23  | 5020.36 | 281164.05  | 5098.86 | 98.91  | 0.03 (0.01-0.05)    |
| Tajikistan                 | Osteoarthritis knee  | 70984.08   | 2525.76 | 144414.10  | 2624.62 | 103.45 | 0.10 (0.07-0.13)    |
| Tajikistan                 | Osteoarthritis hip   | 8709.22    | 308.70  | 17593.07   | 329.19  | 102.01 | 0.16 (0.12-0.20)    |
| Tajikistan                 | Osteoarthritis hand  | 56872.96   | 2025.30 | 108224.05  | 1985.78 | 90.29  | -0.08 (-0.10--0.05) |
| Tajikistan                 | Osteoarthritis other | 19048.54   | 685.30  | 35277.67   | 695.13  | 85.20  | 0.03 (0.01-0.04)    |
| Thailand                   | Osteoarthritis       | 1493563.31 | 3938.08 | 4830195.78 | 4586.85 | 223.40 | 0.56 (0.54-0.57)    |
| Thailand                   | Osteoarthritis knee  | 1229368.55 | 3199.26 | 4010730.97 | 3795.73 | 226.24 | 0.63 (0.61-0.65)    |
| Thailand                   | Osteoarthritis hip   | 78242.22   | 211.92  | 288865.16  | 279.95  | 269.19 | 1.00 (0.97-1.03)    |
| Thailand                   | Osteoarthritis hand  | 41635.45   | 119.55  | 125643.20  | 121.88  | 201.77 | 0.09 (0.07-0.11)    |
| Thailand                   | Osteoarthritis other | 234377.59  | 668.07  | 771238.17  | 740.90  | 229.06 | 0.37 (0.35-0.38)    |
| Timor-Leste                | Osteoarthritis       | 11481.15   | 3607.42 | 31255.34   | 3768.44 | 172.23 | 0.16 (0.14-0.18)    |
| Timor-Leste                | Osteoarthritis knee  | 9337.92    | 2862.64 | 25324.26   | 3029.18 | 171.20 | 0.21 (0.19-0.23)    |
| Timor-Leste                | Osteoarthritis hip   | 596.90     | 195.62  | 1672.58    | 203.67  | 180.21 | 0.16 (0.13-0.19)    |
| Timor-Leste                | Osteoarthritis hand  | 327.40     | 116.83  | 923.03     | 116.95  | 181.93 | 0.03 (0.01-0.05)    |
| Timor-Leste                | Osteoarthritis other | 1807.28    | 653.22  | 5237.29    | 658.37  | 189.79 | 0.01 (-0.01-0.03)   |
| Togo                       | Osteoarthritis       | 73556.68   | 5565.43 | 233893.09  | 5856.25 | 217.98 | 0.15 (0.14-0.17)    |
| Togo                       | Osteoarthritis knee  | 47018.12   | 3564.76 | 152716.74  | 3834.70 | 224.80 | 0.22 (0.20-0.24)    |
| Togo                       | Osteoarthritis hip   | 3365.42    | 258.28  | 11307.31   | 290.84  | 235.98 | 0.34 (0.30-0.38)    |

|                     |                      |            |         |            |         |        |                     |
|---------------------|----------------------|------------|---------|------------|---------|--------|---------------------|
| Togo                | Osteoarthritis hand  | 21896.13   | 1661.96 | 67085.37   | 1694.87 | 206.38 | 0.08 (0.07-0.08)    |
| Togo                | Osteoarthritis other | 8100.40    | 670.15  | 25272.29   | 694.95  | 211.99 | 0.09 (0.07-0.11)    |
| Tokelau             | Osteoarthritis       | 63.51      | 4874.57 | 72.73      | 5373.58 | 14.51  | 0.32 (0.27-0.37)    |
| Tokelau             | Osteoarthritis knee  | 51.79      | 3984.95 | 60.35      | 4439.11 | 16.53  | 0.36 (0.30-0.41)    |
| Tokelau             | Osteoarthritis hip   | 3.58       | 268.68  | 4.54       | 340.08  | 26.84  | 0.74 (0.62-0.86)    |
| Tokelau             | Osteoarthritis hand  | 3.85       | 292.39  | 3.75       | 282.61  | -2.70  | -0.11 (-0.13--0.10) |
| Tokelau             | Osteoarthritis other | 9.69       | 729.12  | 10.63      | 800.47  | 9.76   | 0.31 (0.26-0.35)    |
| Tonga               | Osteoarthritis       | 2893.80    | 5012.92 | 4389.56    | 5445.81 | 51.69  | 0.20 (0.11-0.30)    |
| Tonga               | Osteoarthritis knee  | 2384.56    | 4094.13 | 3662.99    | 4532.04 | 53.61  | 0.26 (0.16-0.37)    |
| Tonga               | Osteoarthritis hip   | 167.60     | 298.17  | 271.25     | 341.83  | 61.84  | 0.23 (-0.02-0.48)   |
| Tonga               | Osteoarthritis hand  | 157.28     | 287.39  | 228.59     | 289.51  | 45.34  | 0.03 (0.02-0.03)    |
| Tonga               | Osteoarthritis other | 415.05     | 755.47  | 621.00     | 786.41  | 49.62  | 0.07 (-0.02-0.16)   |
| Trinidad and Tobago | Osteoarthritis       | 46952.59   | 5551.66 | 110840.86  | 5919.57 | 136.07 | 0.26 (0.24-0.29)    |
| Trinidad and Tobago | Osteoarthritis knee  | 36640.22   | 4324.02 | 88017.18   | 4689.89 | 140.22 | 0.33 (0.30-0.36)    |
| Trinidad and Tobago | Osteoarthritis hip   | 2586.92    | 303.82  | 6618.19    | 354.20  | 155.83 | 0.63 (0.57-0.69)    |
| Trinidad and Tobago | Osteoarthritis hand  | 6420.86    | 771.60  | 14317.74   | 767.16  | 122.99 | -0.02 (-0.02--0.01) |
| Trinidad and Tobago | Osteoarthritis other | 6128.85    | 740.42  | 14451.24   | 774.36  | 135.79 | 0.21 (0.17-0.24)    |
| Tunisia             | Osteoarthritis       | 249952.74  | 4846.91 | 684102.71  | 5268.93 | 173.69 | 0.28 (0.27-0.28)    |
| Tunisia             | Osteoarthritis knee  | 176861.22  | 3417.02 | 495378.67  | 3810.28 | 180.09 | 0.36 (0.35-0.37)    |
| Tunisia             | Osteoarthritis hip   | 11352.48   | 220.34  | 34232.19   | 266.17  | 201.54 | 0.62 (0.60-0.64)    |
| Tunisia             | Osteoarthritis hand  | 46706.68   | 915.93  | 120386.30  | 933.31  | 157.75 | 0.06 (0.06-0.07)    |
| Tunisia             | Osteoarthritis other | 36783.30   | 740.64  | 100426.42  | 789.67  | 173.02 | 0.22 (0.22-0.23)    |
| Turkey              | Osteoarthritis       | 1709749.35 | 4613.17 | 4606240.98 | 5089.53 | 169.41 | 0.31 (0.30-0.32)    |
| Turkey              | Osteoarthritis knee  | 1388716.24 | 3738.22 | 3785117.64 | 4179.01 | 172.56 | 0.36 (0.35-0.37)    |

|                      |                      |            |         |            |         |         |                     |
|----------------------|----------------------|------------|---------|------------|---------|---------|---------------------|
| Turkey               | Osteoarthritis hip   | 87348.57   | 236.27  | 262927.12  | 292.26  | 201.01  | 0.67 (0.63-0.70)    |
| Turkey               | Osteoarthritis hand  | 92640.48   | 259.24  | 231148.68  | 259.99  | 149.51  | -0.11 (-0.27-0.06)  |
| Turkey               | Osteoarthritis other | 272082.22  | 762.29  | 734647.55  | 824.57  | 170.01  | 0.25 (0.24-0.26)    |
| Turkmenistan         | Osteoarthritis       | 90867.38   | 4724.54 | 209718.66  | 5111.81 | 130.80  | 0.26 (0.24-0.29)    |
| Turkmenistan         | Osteoarthritis knee  | 51692.99   | 2687.46 | 119812.69  | 2923.44 | 131.78  | 0.28 (0.26-0.29)    |
| Turkmenistan         | Osteoarthritis hip   | 6788.02    | 352.49  | 16797.38   | 418.75  | 147.46  | 0.55 (0.52-0.57)    |
| Turkmenistan         | Osteoarthritis hand  | 27098.23   | 1416.99 | 62739.97   | 1543.81 | 131.53  | 0.33 (0.23-0.43)    |
| Turkmenistan         | Osteoarthritis other | 13262.75   | 713.67  | 29500.73   | 751.43  | 122.43  | 0.13 (0.10-0.15)    |
| Tuvalu               | Osteoarthritis       | 337.62     | 4823.77 | 549.96     | 5229.54 | 62.89   | 0.24 (0.18-0.30)    |
| Tuvalu               | Osteoarthritis knee  | 278.61     | 3946.28 | 458.14     | 4326.87 | 64.44   | 0.28 (0.21-0.34)    |
| Tuvalu               | Osteoarthritis hip   | 17.80      | 257.73  | 32.05      | 310.60  | 80.06   | 0.51 (0.37-0.66)    |
| Tuvalu               | Osteoarthritis hand  | 19.63      | 298.31  | 29.11      | 288.59  | 48.27   | -0.12 (-0.12--0.12) |
| Tuvalu               | Osteoarthritis other | 47.65      | 716.58  | 78.00      | 768.96  | 63.72   | 0.20 (0.14-0.25)    |
| Uganda               | Osteoarthritis       | 356336.12  | 5325.98 | 837816.72  | 5583.56 | 135.12  | 0.18 (0.17-0.19)    |
| Uganda               | Osteoarthritis knee  | 219944.80  | 3288.68 | 524060.22  | 3510.46 | 138.27  | 0.25 (0.24-0.27)    |
| Uganda               | Osteoarthritis hip   | 18456.54   | 279.05  | 45973.40   | 311.82  | 149.09  | 0.44 (0.42-0.46)    |
| Uganda               | Osteoarthritis hand  | 110366.24  | 1652.89 | 252536.63  | 1686.63 | 128.82  | 0.07 (0.06-0.08)    |
| Uganda               | Osteoarthritis other | 40948.09   | 653.28  | 93879.52   | 678.03  | 129.26  | 0.15 (0.14-0.15)    |
| Ukraine              | Osteoarthritis       | 4055559.28 | 5702.31 | 4351117.75 | 5868.40 | 7.29    | 0.17 (0.13-0.21)    |
| Ukraine              | Osteoarthritis knee  | 2414178.70 | 3377.12 | 2629589.14 | 3534.63 | 8.92    | 0.17 (0.16-0.18)    |
| Ukraine              | Osteoarthritis hip   | 280940.82  | 396.64  | 320250.60  | 430.66  | 13.99   | 0.30 (0.27-0.32)    |
| Ukraine              | Osteoarthritis hand  | 1309987.62 | 1848.30 | 1375400.29 | 1843.76 | 4.99    | 0.25 (0.09-0.41)    |
| Ukraine              | Osteoarthritis other | 540180.76  | 759.37  | 588448.25  | 779.16  | 8.94    | 0.09 (0.08-0.10)    |
| United Arab Emirates | Osteoarthritis       | 28991.46   | 4889.03 | 339145.94  | 5318.62 | 1069.81 | 0.30 (0.28-0.32)    |



|                              |                      |             |         |             |         |         |                     |
|------------------------------|----------------------|-------------|---------|-------------|---------|---------|---------------------|
| United Arab Emirates         | Osteoarthritis knee  | 20543.85    | 3483.37 | 245099.34   | 3886.72 | 1093.05 | 0.38 (0.37-0.40)    |
| United Arab Emirates         | Osteoarthritis hip   | 1651.34     | 251.58  | 21270.73    | 330.47  | 1188.09 | 0.96 (0.93-0.99)    |
| United Arab Emirates         | Osteoarthritis hand  | 4501.96     | 827.19  | 44909.36    | 757.75  | 897.55  | -0.32 (-0.34--0.30) |
| United Arab Emirates         | Osteoarthritis other | 4010.40     | 788.57  | 47299.11    | 883.16  | 1079.41 | 0.42 (0.39-0.46)    |
| United Kingdom               | Osteoarthritis       | 5965891.54  | 7064.06 | 8507371.02  | 7504.90 | 42.60   | 0.19 (0.06-0.31)    |
| United Kingdom               | Osteoarthritis knee  | 3637137.04  | 4247.78 | 5258099.86  | 4589.41 | 44.57   | 0.31 (0.23-0.39)    |
| United Kingdom               | Osteoarthritis hip   | 605168.00   | 702.51  | 937189.08   | 807.84  | 54.86   | 0.50 (0.46-0.54)    |
| United Kingdom               | Osteoarthritis hand  | 2119020.51  | 2498.49 | 2970513.41  | 2593.15 | 40.18   | -0.03 (-0.38-0.33)  |
| United Kingdom               | Osteoarthritis other | 632248.23   | 730.40  | 916903.77   | 778.90  | 45.02   | 0.22 (0.20-0.24)    |
| United Republic of Tanzania  | Osteoarthritis       | 613555.99   | 5441.73 | 1493336.59  | 5724.76 | 143.39  | 0.18 (0.17-0.19)    |
| United Republic of Tanzania  | Osteoarthritis knee  | 382214.10   | 3385.80 | 944689.71   | 3638.56 | 147.16  | 0.26 (0.25-0.27)    |
| United Republic of Tanzania  | Osteoarthritis hip   | 33280.64    | 298.96  | 88973.28    | 348.64  | 167.34  | 0.57 (0.54-0.59)    |
| United Republic of Tanzania  | Osteoarthritis hand  | 185833.53   | 1654.38 | 432305.10   | 1657.84 | 132.63  | 0.01 (0.00-0.01)    |
| United Republic of Tanzania  | Osteoarthritis other | 71364.34    | 674.43  | 173632.65   | 713.67  | 143.30  | 0.19 (0.18-0.20)    |
| United States of America     | Osteoarthritis       | 28873208.98 | 9640.82 | 51865888.52 | 9960.88 | 79.63   | 0.06 (-0.08-0.21)   |
| United States of America     | Osteoarthritis knee  | 14591499.28 | 4807.81 | 24739942.69 | 4705.36 | 69.55   | -0.26 (-0.46--0.06) |
| United States of America     | Osteoarthritis hip   | 2557288.55  | 827.02  | 5519541.19  | 1031.12 | 115.84  | 0.70 (0.60-0.80)    |
| United States of America     | Osteoarthritis hand  | 15748311.76 | 5264.77 | 30362507.83 | 5721.76 | 92.80   | 0.30 (0.05-0.56)    |
| United States of America     | Osteoarthritis other | 2321706.25  | 751.87  | 4212913.90  | 806.24  | 81.46   | 0.26 (0.24-0.29)    |
| United States Virgin Islands | Osteoarthritis       | 5365.51     | 5934.90 | 11304.24    | 6296.88 | 110.68  | 0.20 (0.19-0.22)    |
| United States Virgin Islands | Osteoarthritis knee  | 4225.80     | 4670.23 | 9096.90     | 5034.35 | 115.27  | 0.26 (0.24-0.28)    |
| United States Virgin Islands | Osteoarthritis hip   | 320.29      | 362.99  | 748.97      | 413.15  | 133.84  | 0.45 (0.39-0.50)    |
| United States Virgin Islands | Osteoarthritis hand  | 682.75      | 778.85  | 1415.18     | 785.31  | 107.28  | 0.02 (0.01-0.03)    |
| United States Virgin Islands | Osteoarthritis other | 686.92      | 796.74  | 1495.10     | 819.56  | 117.65  | 0.10 (0.07-0.12)    |

|                                    |                      |            |         |            |         |        |                     |
|------------------------------------|----------------------|------------|---------|------------|---------|--------|---------------------|
| Uruguay                            | Osteoarthritis       | 282329.86  | 7471.05 | 400367.80  | 8059.42 | 41.81  | 0.25 (0.23-0.28)    |
| Uruguay                            | Osteoarthritis knee  | 160729.83  | 4218.91 | 238347.57  | 4763.67 | 48.29  | 0.40 (0.36-0.44)    |
| Uruguay                            | Osteoarthritis hip   | 19627.47   | 512.24  | 34416.43   | 674.44  | 75.35  | 0.95 (0.85-1.06)    |
| Uruguay                            | Osteoarthritis hand  | 126121.78  | 3327.31 | 167559.63  | 3339.92 | 32.86  | 0.02 (0.01-0.02)    |
| Uruguay                            | Osteoarthritis other | 25711.78   | 672.30  | 38670.55   | 747.98  | 50.40  | 0.37 (0.33-0.41)    |
| Uzbekistan                         | Osteoarthritis       | 586243.80  | 5171.65 | 1247288.94 | 5428.77 | 112.76 | 0.16 (0.14-0.17)    |
| Uzbekistan                         | Osteoarthritis knee  | 299029.19  | 2639.65 | 658613.48  | 2870.13 | 120.25 | 0.27 (0.25-0.29)    |
| Uzbekistan                         | Osteoarthritis hip   | 38256.13   | 336.51  | 89018.15   | 400.44  | 132.69 | 0.56 (0.52-0.61)    |
| Uzbekistan                         | Osteoarthritis hand  | 231774.08  | 2055.63 | 458540.19  | 2030.60 | 97.84  | -0.04 (-0.04--0.03) |
| Uzbekistan                         | Osteoarthritis other | 77469.89   | 698.32  | 156985.60  | 741.23  | 102.64 | 0.17 (0.15-0.19)    |
| Vanuatu                            | Osteoarthritis       | 3201.09    | 4629.86 | 9042.38    | 5007.97 | 182.48 | 0.28 (0.26-0.30)    |
| Vanuatu                            | Osteoarthritis knee  | 2619.30    | 3737.42 | 7522.22    | 4124.67 | 187.18 | 0.36 (0.33-0.38)    |
| Vanuatu                            | Osteoarthritis hip   | 174.86     | 259.53  | 506.94     | 288.36  | 189.91 | 0.35 (0.31-0.38)    |
| Vanuatu                            | Osteoarthritis hand  | 175.58     | 273.93  | 472.71     | 279.19  | 169.23 | 0.08 (0.07-0.09)    |
| Vanuatu                            | Osteoarthritis other | 455.76     | 720.41  | 1246.84    | 739.37  | 173.58 | 0.09 (0.09-0.10)    |
| Venezuela (Bolivarian Republic of) | Osteoarthritis       | 506586.31  | 5082.70 | 1634425.65 | 5455.53 | 222.64 | 0.23 (0.22-0.25)    |
| Venezuela (Bolivarian Republic of) | Osteoarthritis knee  | 420471.16  | 4214.87 | 1373762.16 | 4581.67 | 226.72 | 0.27 (0.26-0.29)    |
| Venezuela (Bolivarian Republic of) | Osteoarthritis hip   | 25504.13   | 253.88  | 86745.85   | 292.61  | 240.12 | 0.48 (0.45-0.51)    |
| Venezuela (Bolivarian Republic of) | Osteoarthritis hand  | 34440.19   | 359.53  | 106185.42  | 360.70  | 208.32 | -0.02 (-0.04-0.00)  |
| Venezuela (Bolivarian Republic of) | Osteoarthritis other | 69578.70   | 727.34  | 224759.43  | 763.47  | 223.03 | 0.16 (0.15-0.17)    |
| Viet Nam                           | Osteoarthritis       | 1469494.47 | 3672.14 | 3876620.68 | 3914.20 | 163.81 | 0.24 (0.23-0.26)    |
| Viet Nam                           | Osteoarthritis knee  | 1181628.69 | 2939.33 | 3172729.28 | 3170.44 | 168.50 | 0.29 (0.27-0.31)    |
| Viet Nam                           | Osteoarthritis hip   | 76892.34   | 190.32  | 203392.61  | 212.16  | 164.52 | 0.43 (0.39-0.48)    |
| Viet Nam                           | Osteoarthritis hand  | 49118.48   | 127.18  | 115812.01  | 125.84  | 135.78 | -0.04 (-0.04--0.04) |

|          |                      |           |         |           |         |        |                     |
|----------|----------------------|-----------|---------|-----------|---------|--------|---------------------|
| Viet Nam | Osteoarthritis other | 252309.81 | 644.95  | 624315.46 | 666.82  | 147.44 | 0.12 (0.11-0.14)    |
| Yemen    | Osteoarthritis       | 226788.63 | 4477.71 | 669350.22 | 4770.47 | 195.14 | 0.24 (0.23-0.25)    |
| Yemen    | Osteoarthritis knee  | 156948.96 | 3084.62 | 472304.98 | 3359.77 | 200.93 | 0.32 (0.31-0.33)    |
| Yemen    | Osteoarthritis hip   | 8688.24   | 169.16  | 28344.82  | 199.07  | 226.24 | 0.63 (0.60-0.65)    |
| Yemen    | Osteoarthritis hand  | 46709.30  | 945.47  | 128176.22 | 929.92  | 174.41 | -0.05 (-0.07--0.04) |
| Yemen    | Osteoarthritis other | 31739.94  | 667.12  | 93823.64  | 715.89  | 195.60 | 0.28 (0.27-0.30)    |
| Zambia   | Osteoarthritis       | 162459.16 | 5400.66 | 406981.64 | 5659.86 | 150.51 | 0.15 (0.14-0.16)    |
| Zambia   | Osteoarthritis knee  | 100920.23 | 3361.96 | 256173.27 | 3588.28 | 153.84 | 0.21 (0.20-0.22)    |
| Zambia   | Osteoarthritis hip   | 8828.34   | 301.40  | 23664.39  | 335.85  | 168.05 | 0.34 (0.30-0.38)    |
| Zambia   | Osteoarthritis hand  | 48997.07  | 1624.99 | 119035.74 | 1656.87 | 142.94 | 0.08 (0.08-0.09)    |
| Zambia   | Osteoarthritis other | 18595.93  | 673.00  | 45892.27  | 698.66  | 146.79 | 0.12 (0.09-0.14)    |
| Zimbabwe | Osteoarthritis       | 253138.85 | 5930.52 | 449628.32 | 6070.12 | 77.62  | 0.03 (0.01-0.06)    |
| Zimbabwe | Osteoarthritis knee  | 149678.36 | 3529.22 | 268014.18 | 3660.89 | 79.06  | 0.05 (0.01-0.09)    |
| Zimbabwe | Osteoarthritis hip   | 14364.18  | 341.31  | 25544.63  | 351.74  | 77.84  | -0.07 (-0.15-0.01)  |
| Zimbabwe | Osteoarthritis hand  | 86782.70  | 2020.42 | 153741.37 | 2052.53 | 77.16  | 0.06 (0.06-0.07)    |
| Zimbabwe | Osteoarthritis other | 28108.64  | 705.11  | 48213.90  | 705.63  | 71.53  | -0.06 (-0.09--0.04) |

ASR, age-standardized prevalence rate; EAPC, estimated annual percentage change; UI, uncertainty interval; CI, confidential interval.

\* Change in absolute number (%)

Table S6. The prevalent cases of site-specific OA at different age groups, 1990 and 2019.

| Age groups | OA                                |                                   |              | Knee                              |                                   |              | Hip                               |                                   |              | Hand                              |                                   |              | Other                             |                                   |              |
|------------|-----------------------------------|-----------------------------------|--------------|-----------------------------------|-----------------------------------|--------------|-----------------------------------|-----------------------------------|--------------|-----------------------------------|-----------------------------------|--------------|-----------------------------------|-----------------------------------|--------------|
|            | Case in 1990<br>( $\times 10^5$ ) | Case in 2019<br>( $\times 10^5$ ) | Change * (%) | Case in 1990<br>( $\times 10^5$ ) | Case in 2019<br>( $\times 10^5$ ) | Change * (%) | Case in 1990<br>( $\times 10^5$ ) | Case in 2019<br>( $\times 10^5$ ) | Change * (%) | Case in 1990<br>( $\times 10^5$ ) | Case in 2019<br>( $\times 10^5$ ) | Change * (%) | Case in 1990<br>( $\times 10^5$ ) | Case in 2019<br>( $\times 10^5$ ) | Change * (%) |
| 30 to 34   | 8.1                               | 13.4                              | 65.8         | 4.1                               | 6.9                               | 68.1         | 3.0                               | 5.3                               | 76.2         | 1.8                               | 2.4                               | 38.5         | 0.6                               | 0.9                               | 46.5         |
| 35 to 39   | 56.1                              | 88.3                              | 57.3         | 36.3                              | 58.8                              | 62.2         | 4.6                               | 8.1                               | 77.1         | 12.1                              | 16.4                              | 35.6         | 4.1                               | 6.3                               | 54.4         |
| 40 to 44   | 130.5                             | 228.0                             | 74.7         | 85.6                              | 157.6                             | 84.1         | 6.3                               | 12.2                              | 94.0         | 31.5                              | 45.1                              | 43.3         | 10.1                              | 18.1                              | 79.3         |
| 45 to 49   | 210.5                             | 444.9                             | 111.3        | 141.2                             | 314.6                             | 122.9        | 8.7                               | 19.7                              | 126.4        | 53.0                              | 93.3                              | 76.0         | 17.3                              | 37.6                              | 117.5        |
| 50 to 54   | 309.4                             | 661.7                             | 113.8        | 207.2                             | 473.9                             | 128.8        | 12.9                              | 29.3                              | 126.5        | 85.2                              | 148.4                             | 74.1         | 27.9                              | 61.3                              | 120.0        |
| 55 to 59   | 363.3                             | 762.5                             | 109.9        | 245.2                             | 531.3                             | 116.7        | 17.1                              | 39.0                              | 128.7        | 103.0                             | 198.2                             | 92.3         | 37.1                              | 79.6                              | 114.3        |
| 60 to 64   | 389.1                             | 785.1                             | 101.8        | 258.9                             | 543.3                             | 109.8        | 21.5                              | 46.6                              | 117.2        | 119.2                             | 218.2                             | 83.1         | 43.9                              | 90.9                              | 106.9        |
| 65 to 69   | 344.2                             | 739.0                             | 114.7        | 230.2                             | 513.7                             | 123.2        | 21.9                              | 49.1                              | 124.5        | 107.9                             | 210.0                             | 94.7         | 41.8                              | 92.6                              | 121.7        |
| 70 to 74   | 259.1                             | 586.8                             | 126.5        | 173.5                             | 405.8                             | 133.9        | 17.8                              | 43.3                              | 143.0        | 83.1                              | 173.2                             | 108.4        | 33.8                              | 78.6                              | 132.3        |
| 75 to 79   | 205.3                             | 426.2                             | 107.6        | 134.1                             | 292.1                             | 117.8        | 15.4                              | 33.0                              | 115.1        | 70.7                              | 130.0                             | 83.9         | 28.4                              | 61.3                              | 115.7        |
| 80 to 84   | 124.1                             | 298.2                             | 140.4        | 78.9                              | 198.7                             | 151.7        | 9.6                               | 23.5                              | 143.9        | 44.7                              | 97.0                              | 117.0        | 18.5                              | 46.1                              | 148.4        |
| 85 to 89   | 55.0                              | 160.2                             | 191.4        | 33.0                              | 101.6                             | 207.9        | 4.5                               | 13.2                              | 195.3        | 21.5                              | 57.2                              | 165.9        | 8.9                               | 26.4                              | 197.6        |
| 90 to 94   | 16.5                              | 64.7                              | 291.5        | 9.1                               | 37.5                              | 314.4        | 1.4                               | 5.7                               | 296.4        | 7.2                               | 26.5                              | 269.8        | 2.9                               | 11.2                              | 293.2        |
| 95 plus    | 3.9                               | 19.0                              | 382.1        | 1.9                               | 9.9                               | 416.6        | 0.4                               | 1.8                               | 392.3        | 1.9                               | 8.8                               | 364.6        | 0.7                               | 3.5                               | 375.0        |

\* Change in absolute number (%).

Figure S1. The hierarchical cluster analysis of the temporal trends in ASR of OA at national level.

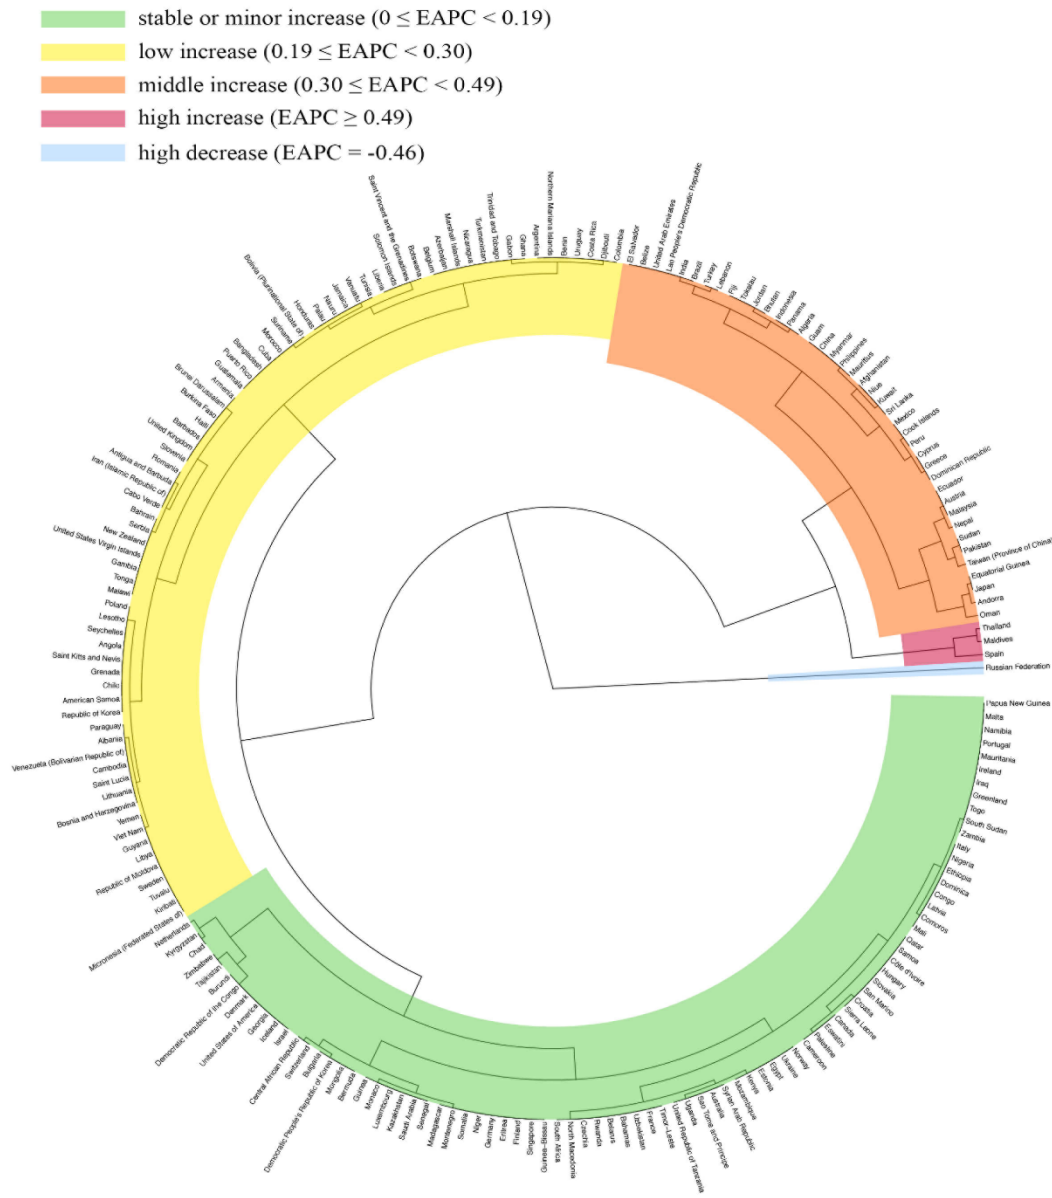

Figure S2. The ASR of OA knee in 2019

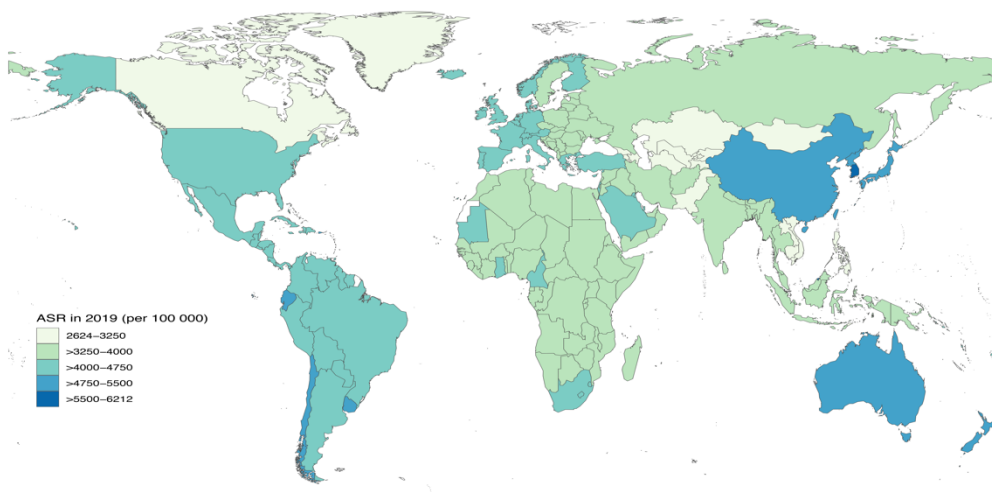

Figure S3. The percentage change in absolute number of OA knee from 1990 to 2019

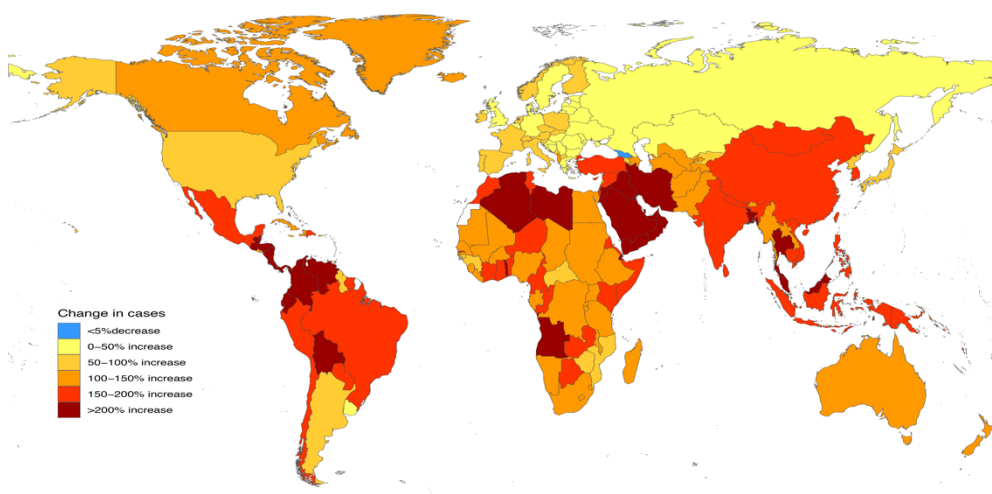

Figure S4. The EAPC in ASR of OA knee from 1990 to 2017

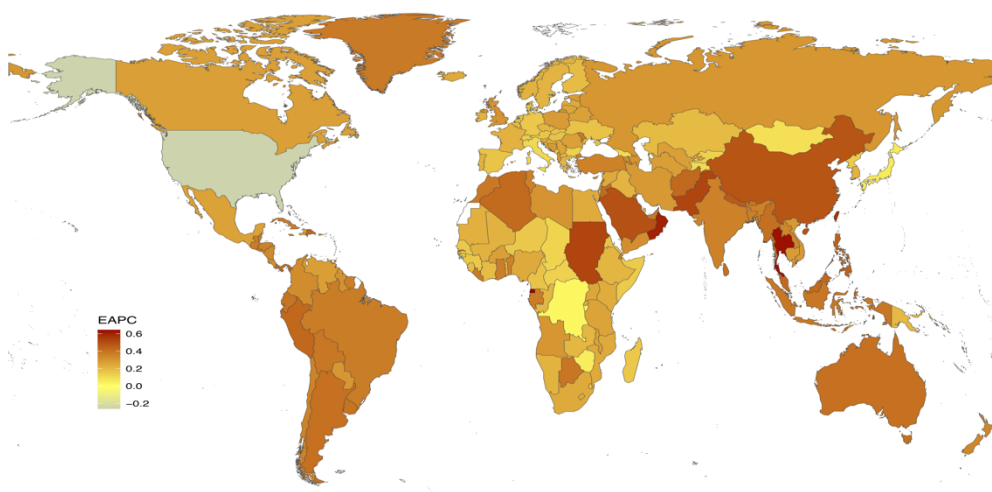

Figure S5. The ASR of OA hip in 2019

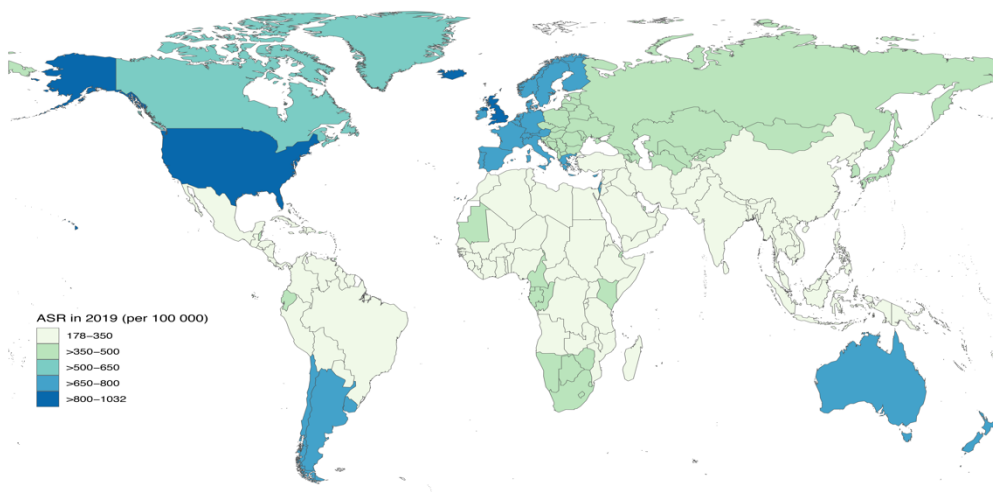

Figure S6. The percentage change in absolute number of OA hip from 1990 to 2019

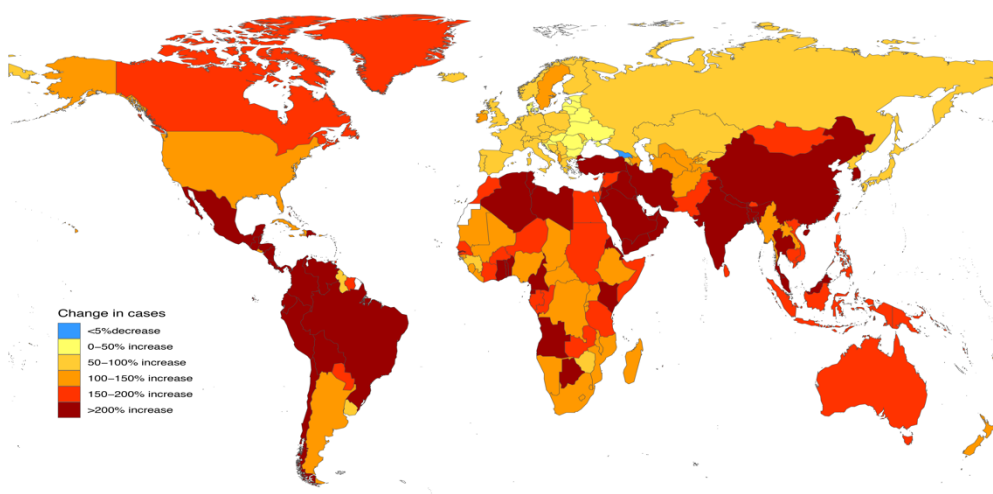

Figure S7. The EAPC in ASR of OA hip from 1990 to 2017

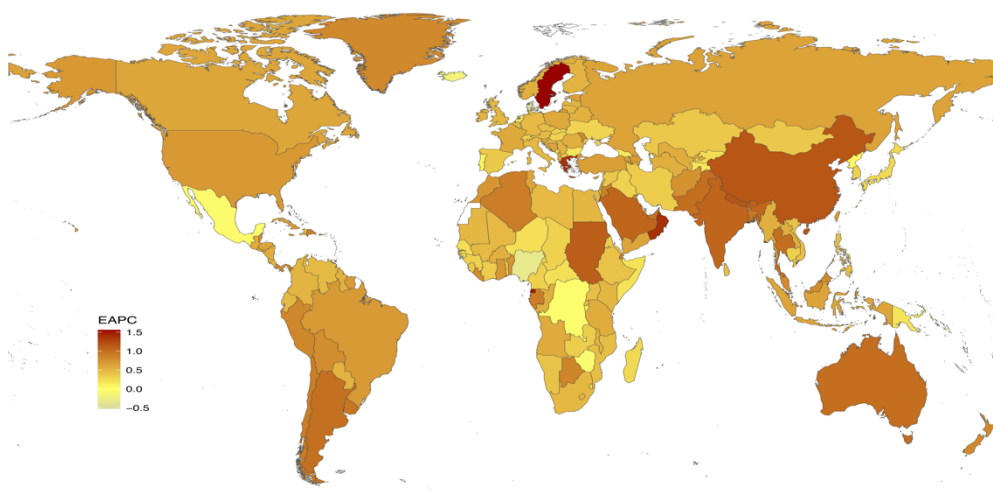

Figure S8. The ASR of OA hand in 2019

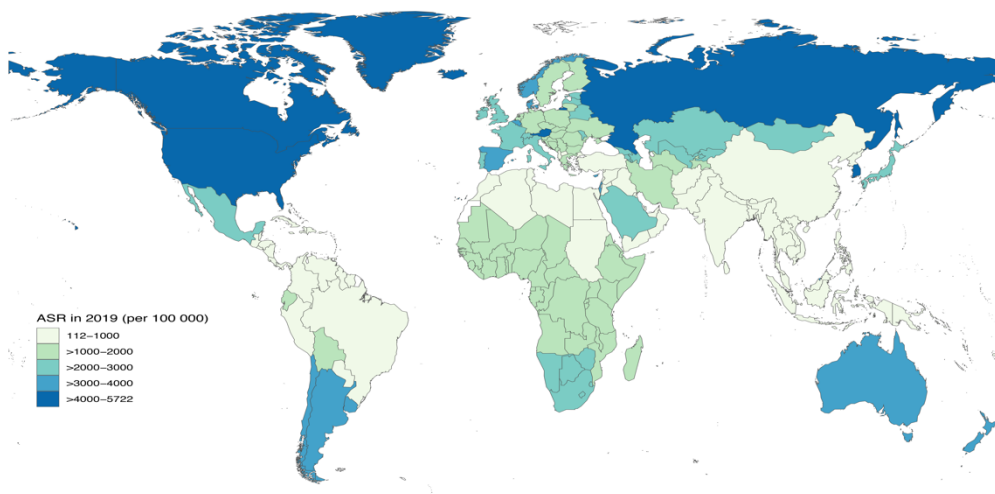

Figure S9. The percentage change in absolute number of OA hand from 1990 to 2019

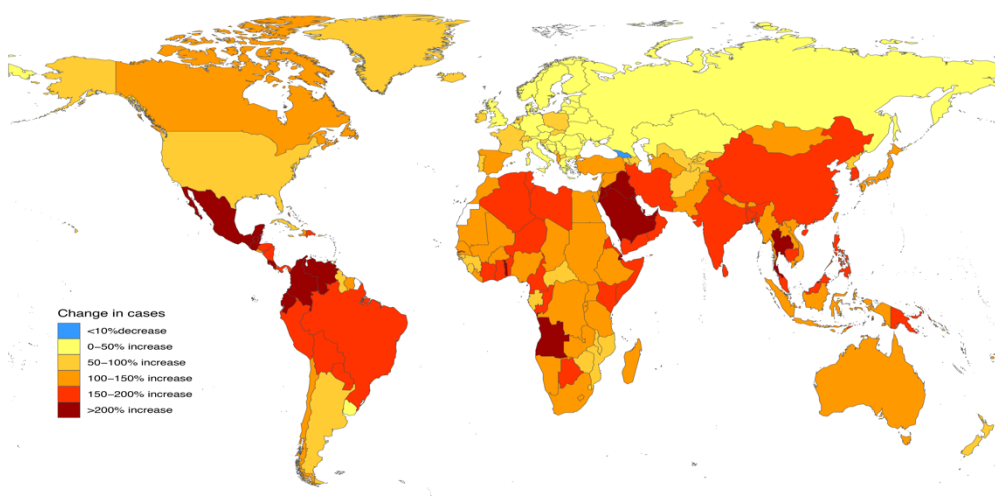

Figure S10. The EAPC in ASR of OA hand from 1990 to 2017

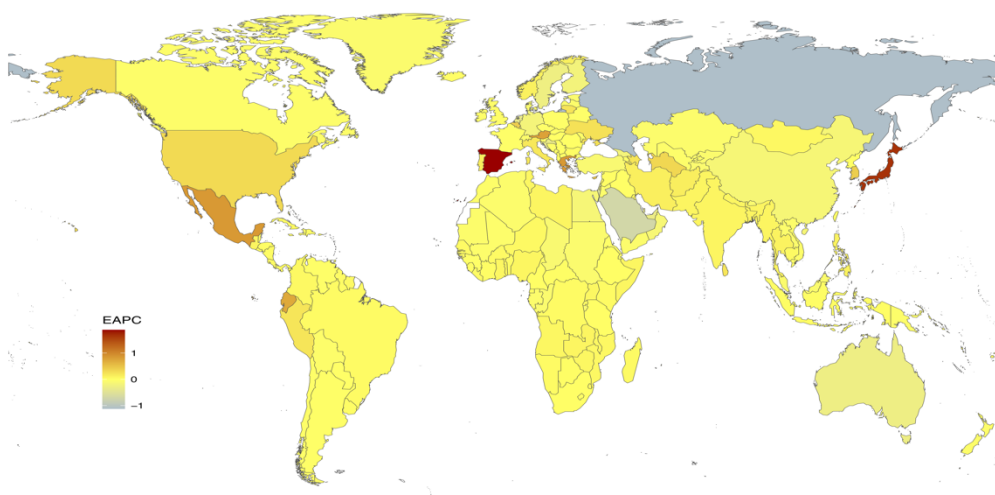



Figure S11. The ASR of OA other in 2019

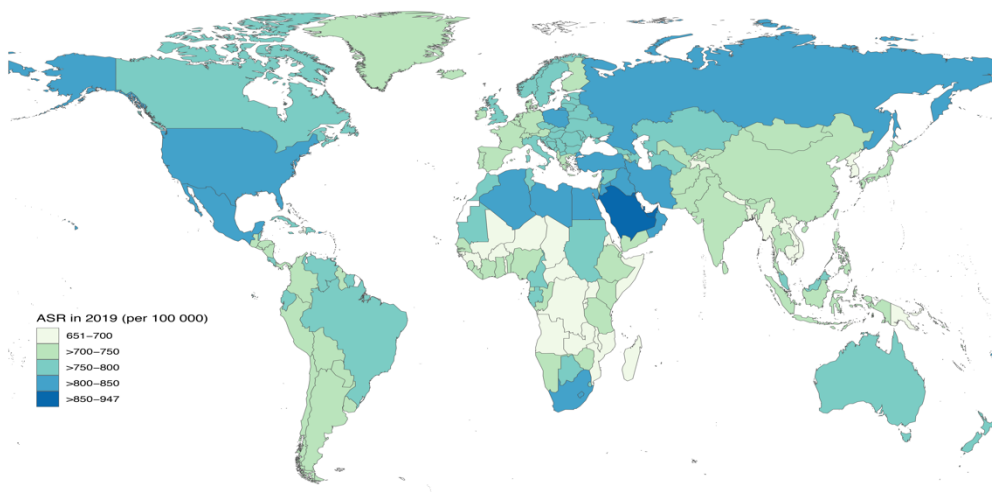

Figure S12. The percentage change in absolute number of OA other from 1990 to 2019

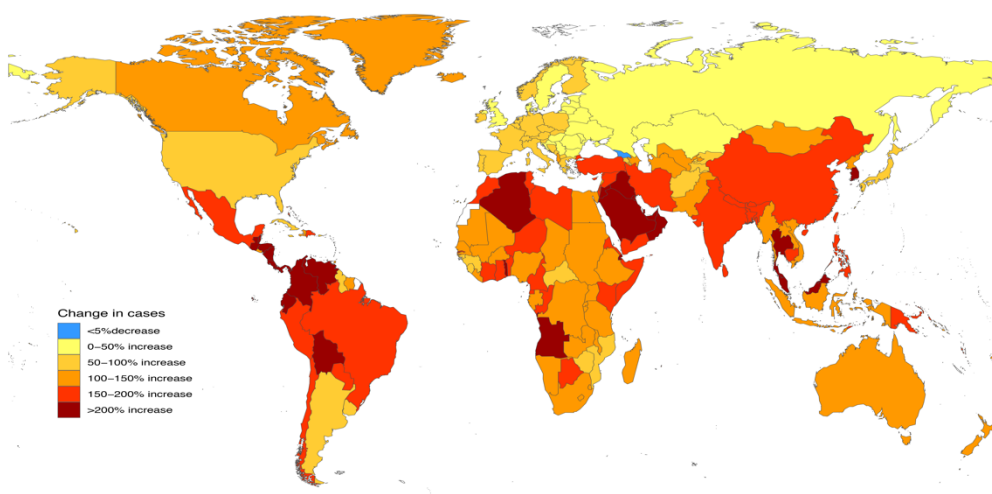

Figure S13. The EAPC in ASR of OA other from 1990 to 2017

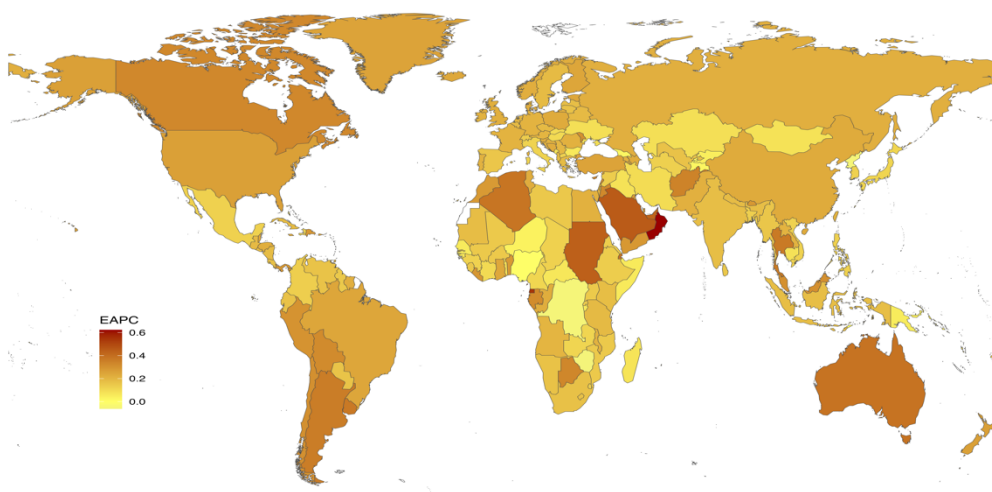

Figure S14. The EAPC in ASR of OA from 1990 to 2019, by specific site, global and regional levels

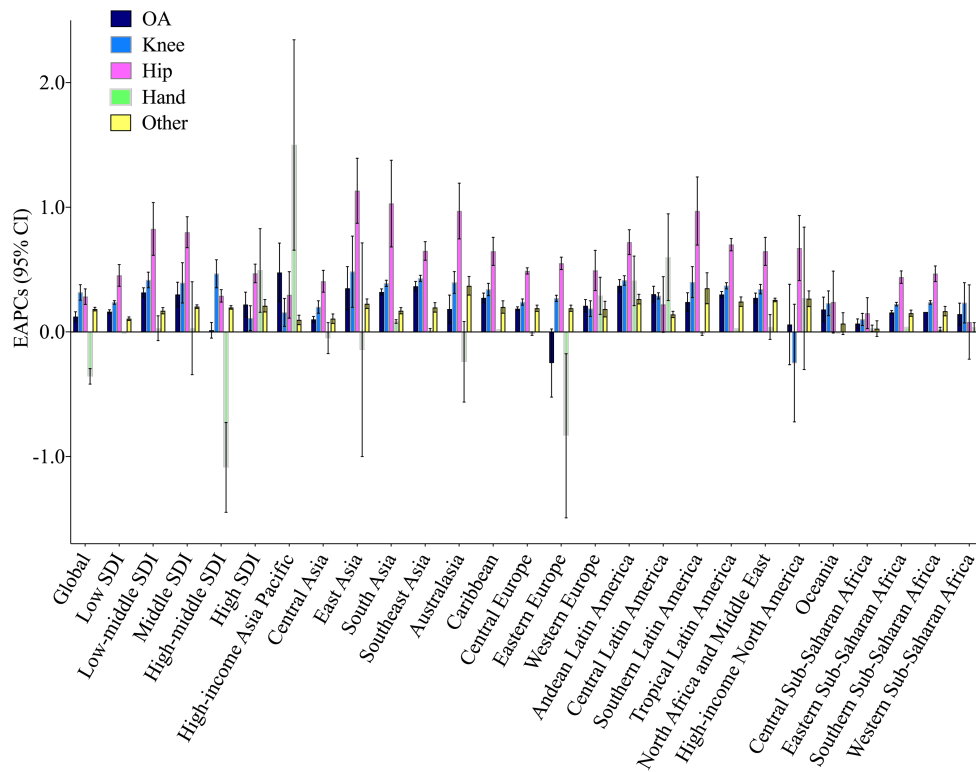

Figure S15. The correlation between ASR and SDI in 1990 (A), and in 2019 (B) for OA knee. The prevalent cases from countries were represented by the circles and its' size and color.

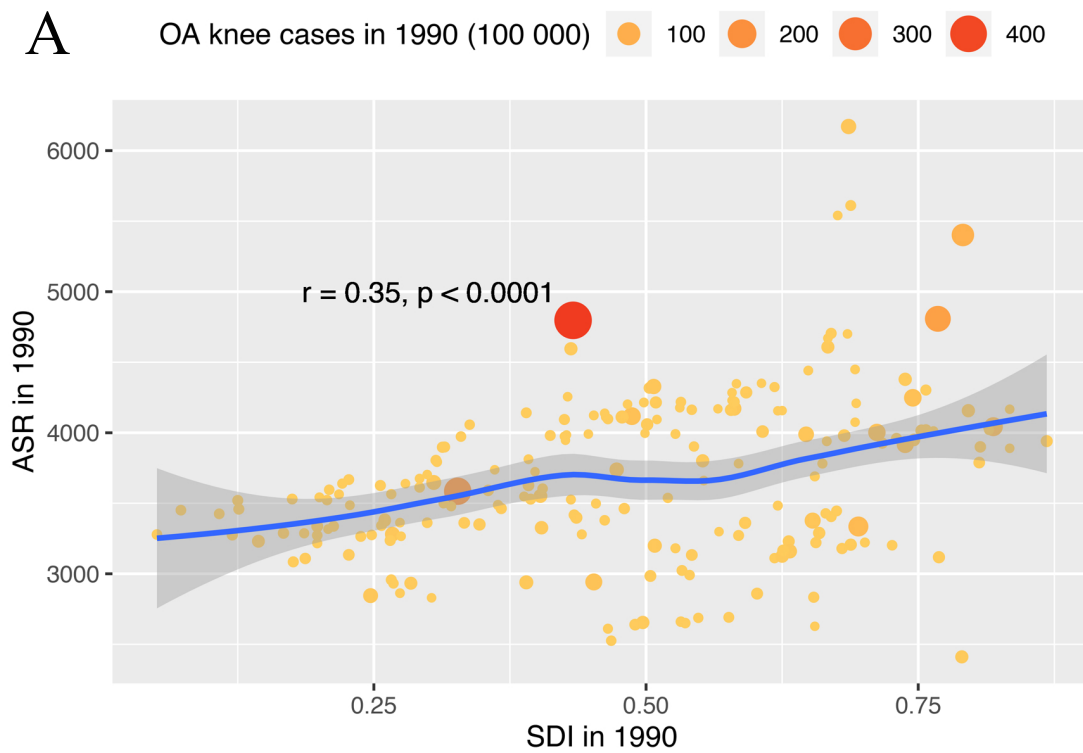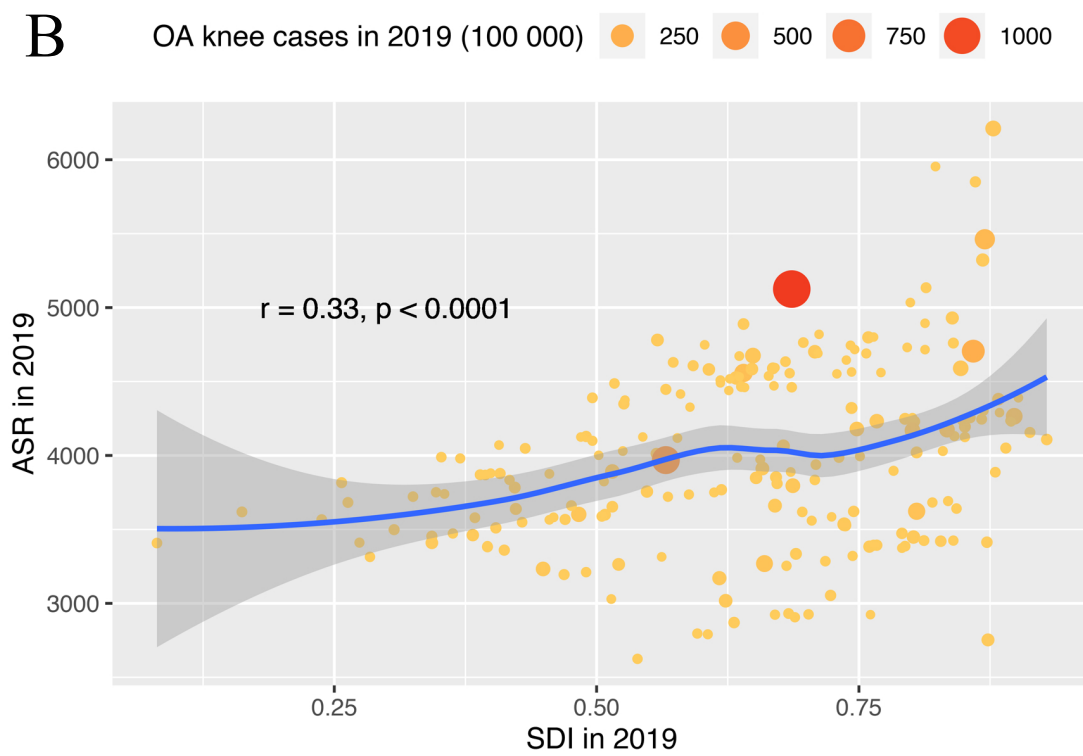

Figure S16. The correlation between ASR and SDI in 1990 (A), and in 2019 (B) for OA hip. The prevalent cases from countries were represented by the circles and its' size and color.

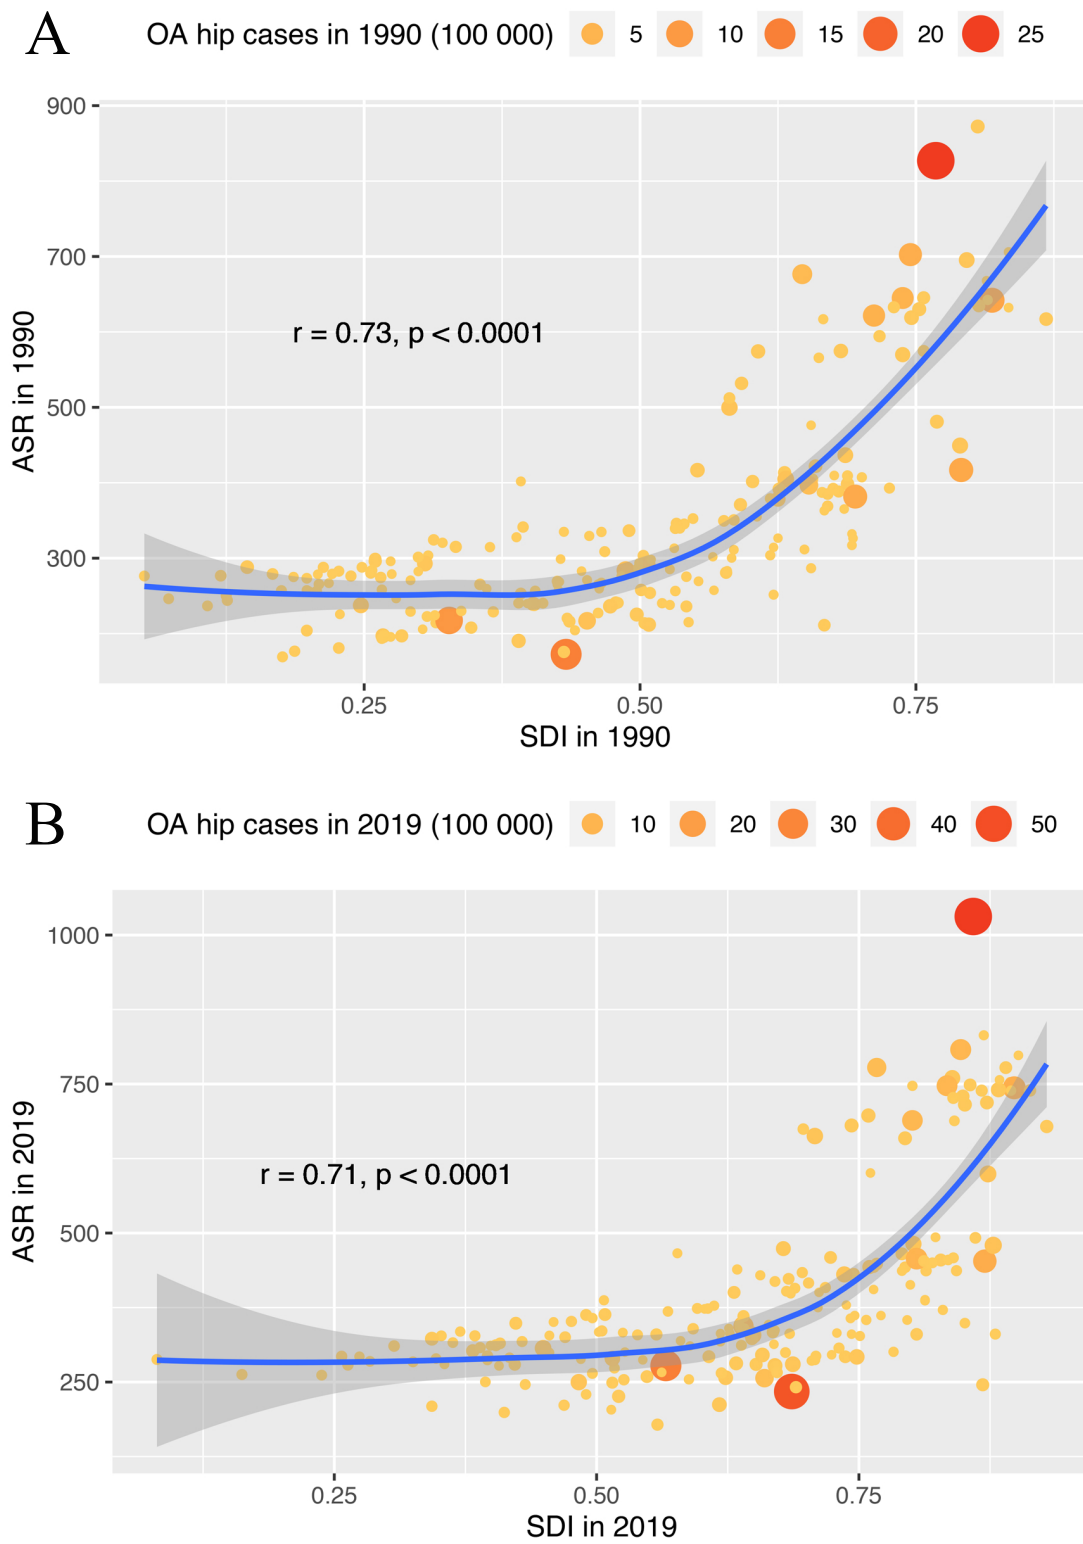

Figure S17. The correlation between ASR and SDI in 1990 (A), and in 2019 (B) for OA hand. The prevalent cases from countries were represented by the circles and its' size and color.

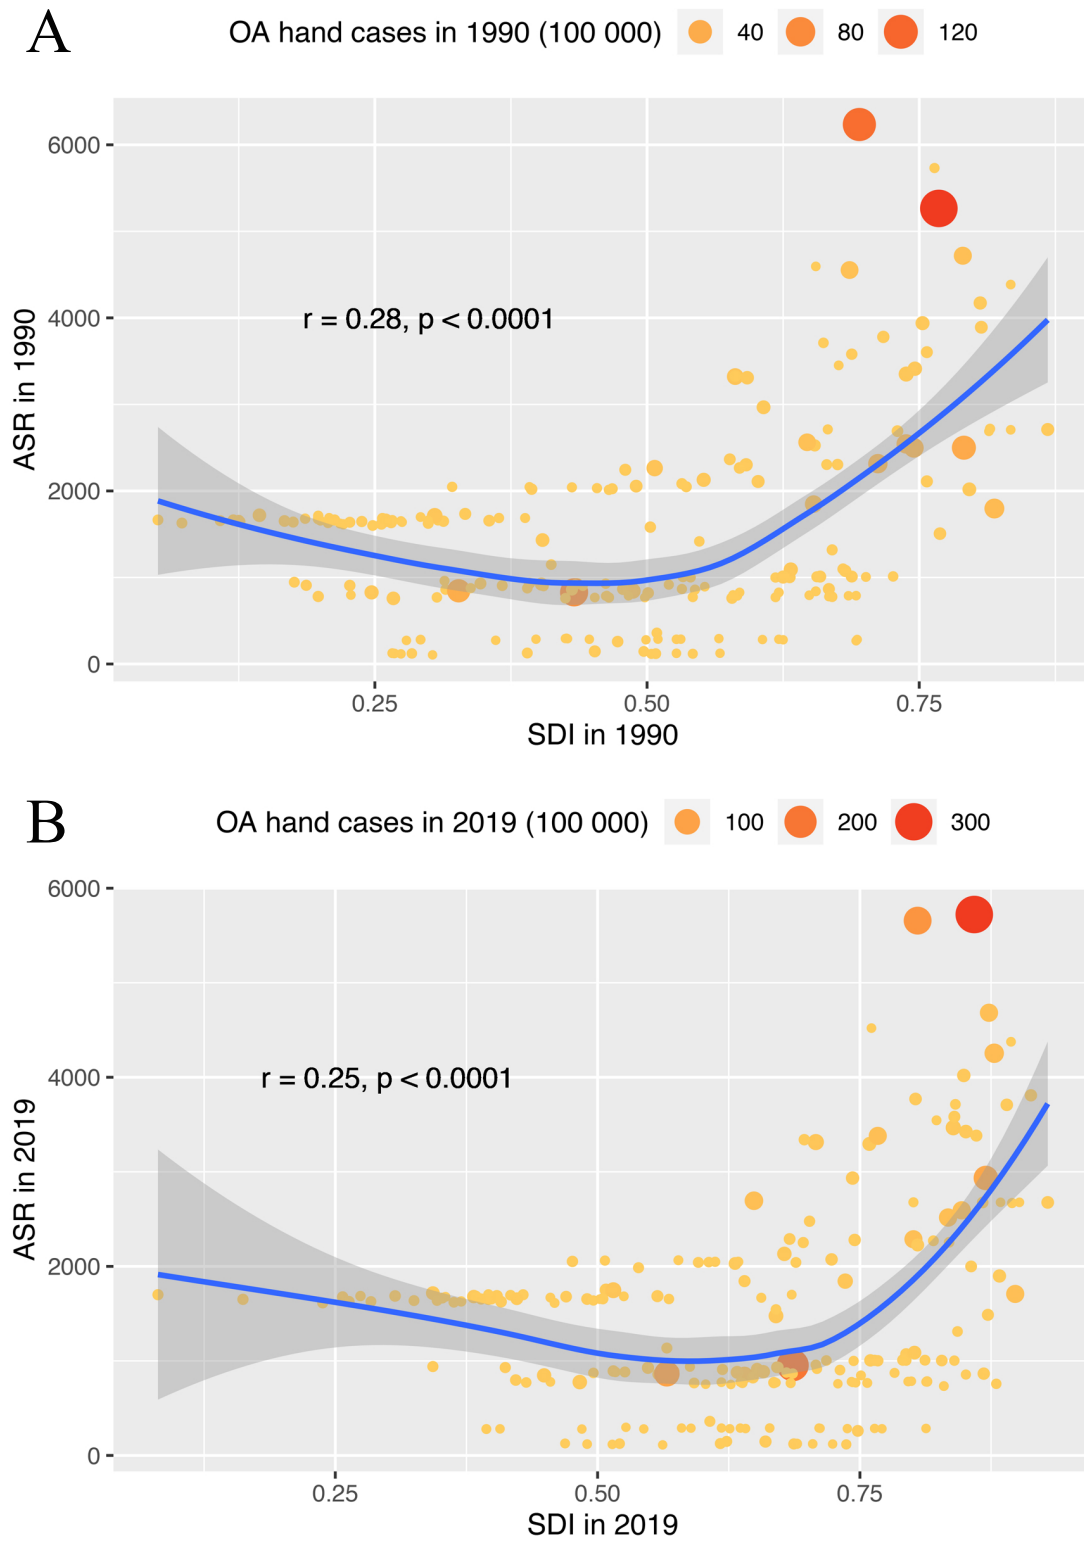

Figure S18. The correlation between ASR and SDI in 1990 (A), and in 2019 (B) for OA other. The prevalent cases from countries were represented by the circles and its' size and color.

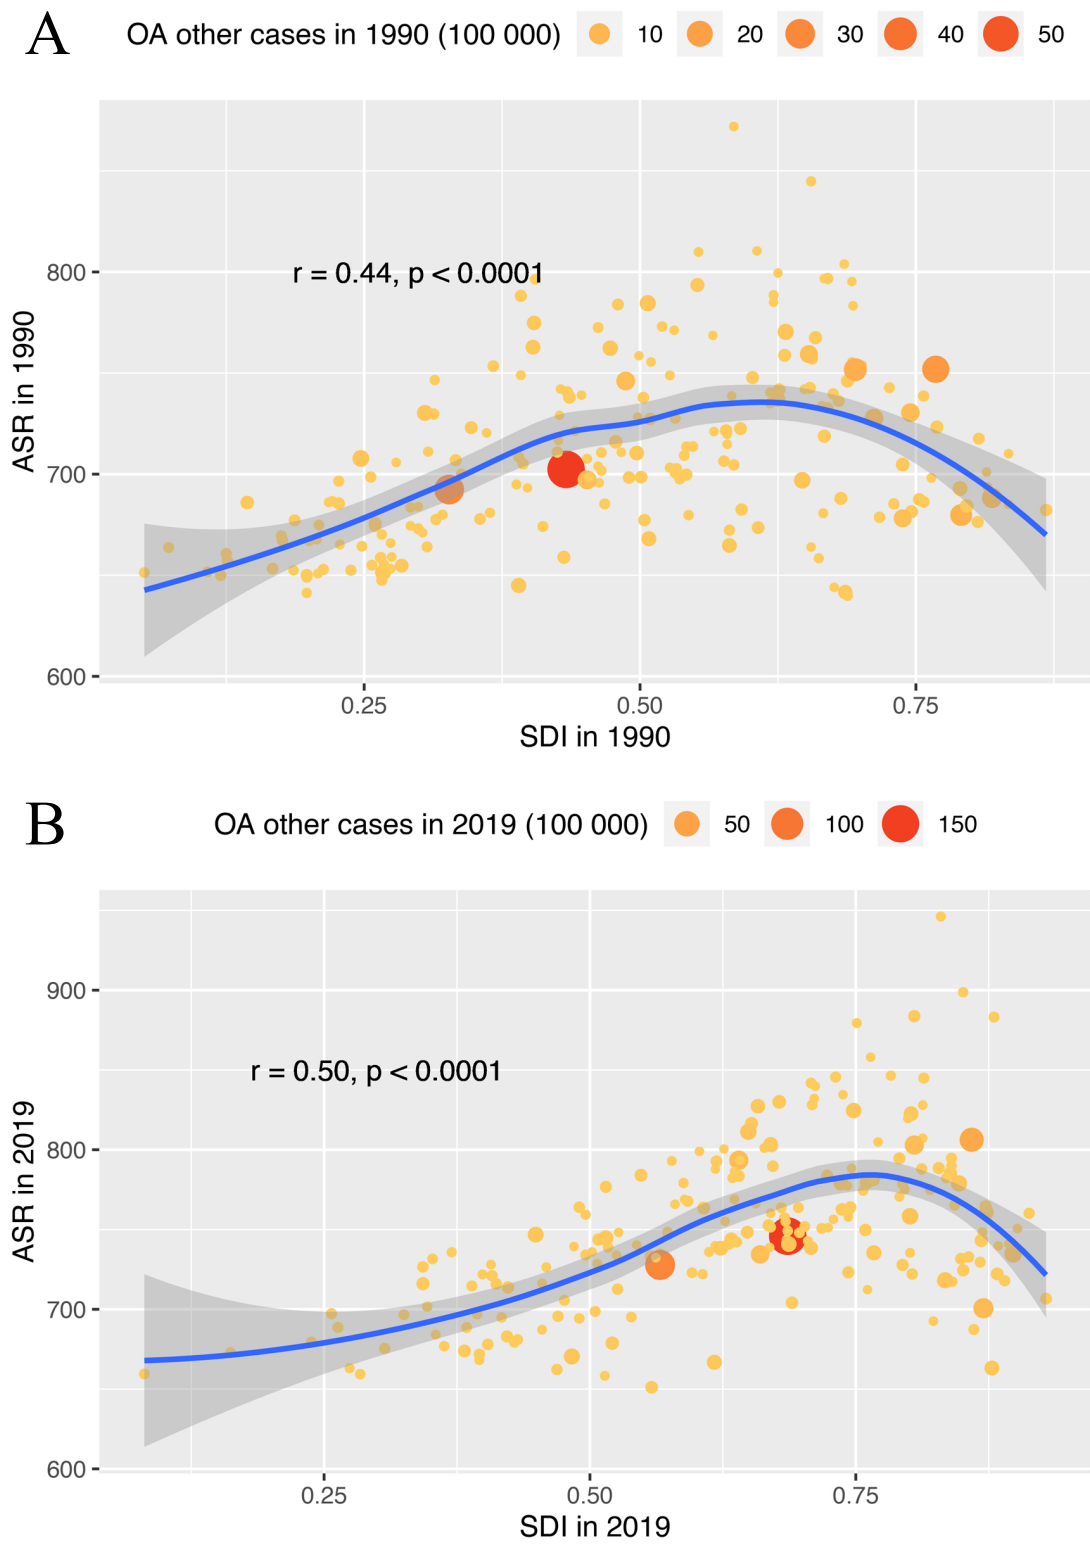

Supplement: ART-74-1172-s001.pdf [file ART-74-1172-s001.pdf]
